# Supplementary material for: Dramatic increase of quench efficiency in “spacerless” dimaleimide fluorogens
Source: Royal Society of Chemistry journal article supplement (doi:10.1039/c0ob00455c), 2010-10-06

# **ELECTRONIC SUPPLEMENTARY INFORMATION**

for

## **Dramatic Increase of Quench Efficiency in “Spacerless” Dimaleimide Fluorogens**

Karine Caron, Virginie Lachapelle and Jeffrey W. Keillor\*

*Département de chimie, Université de Montréal*

*CP 6128, Succursale centre-ville,*

*Montréal, Québec H3C 3J7*

*Canada*

\* Corresponding author: [jw.keillor@umontreal.ca](mailto:jw.keillor@umontreal.ca)

**Contents:** NMR spectra of synthetic intermediates

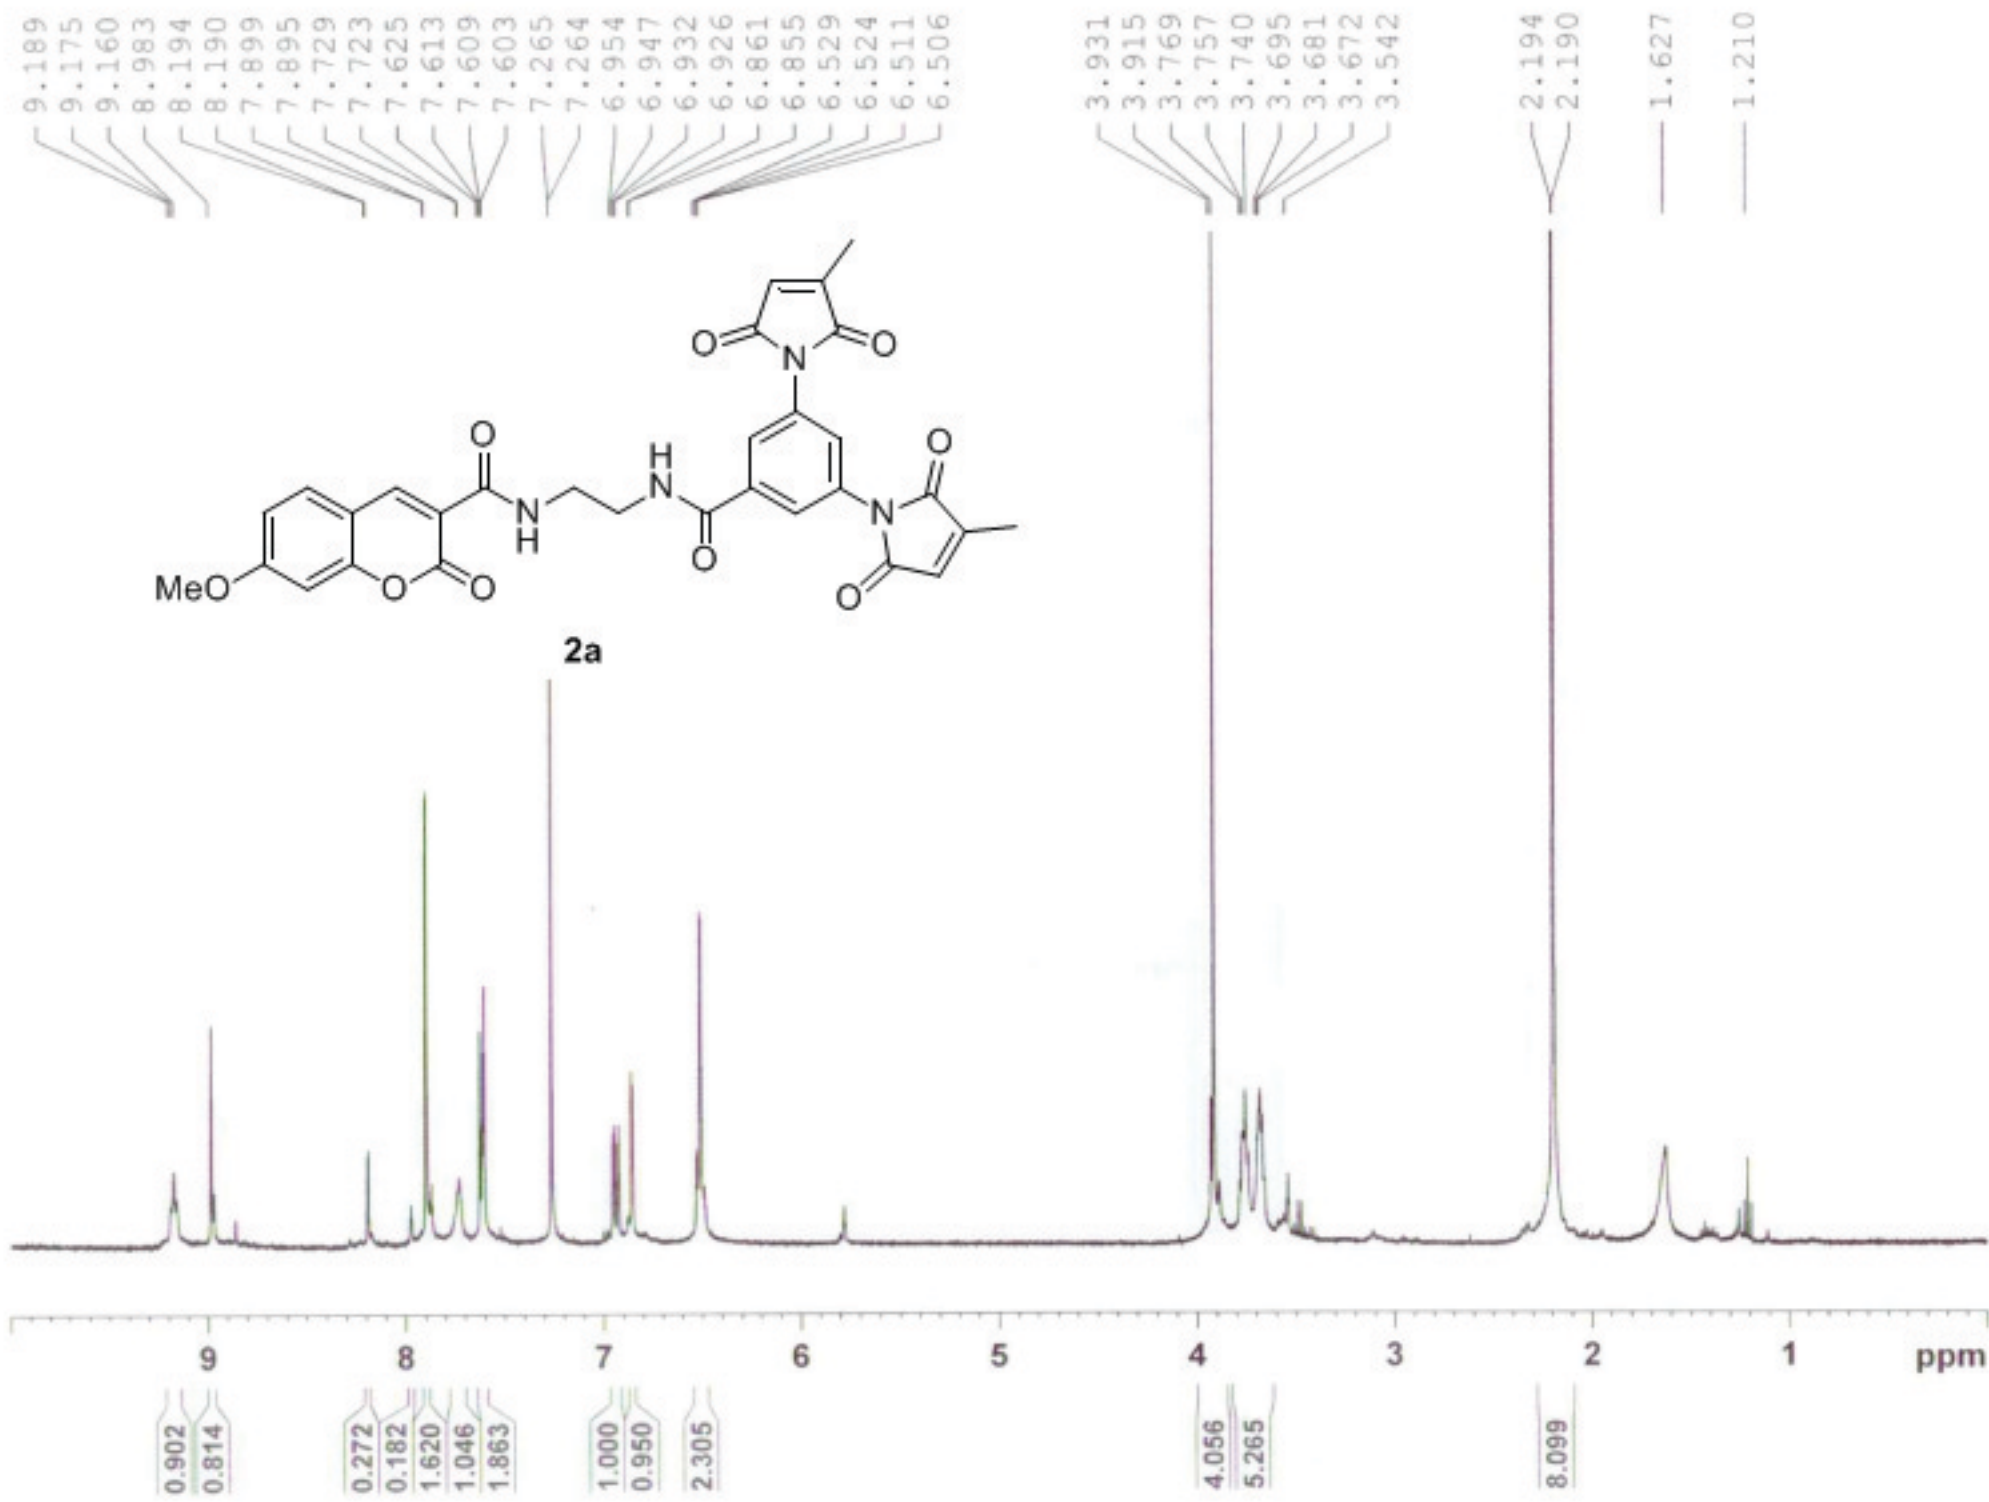

ppm

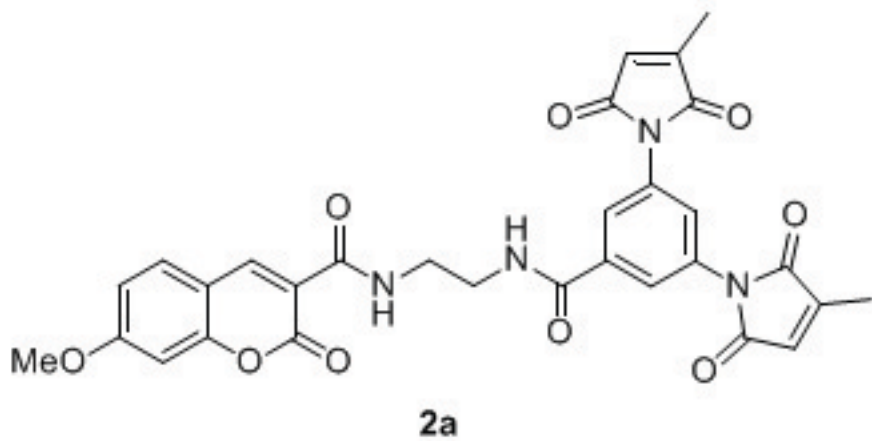

171.476  
170.561  
167.256  
166.077  
165.682  
163.152  
161.931  
157.465  
149.185  
147.249  
137.000  
133.865  
133.603  
132.841  
129.308  
128.918  
128.342  
127.155  
125.762  
116.127  
114.914  
113.391  
101.547

57.540  
41.620  
41.342  
41.064  
40.785  
40.507  
40.229  
39.951

12.152

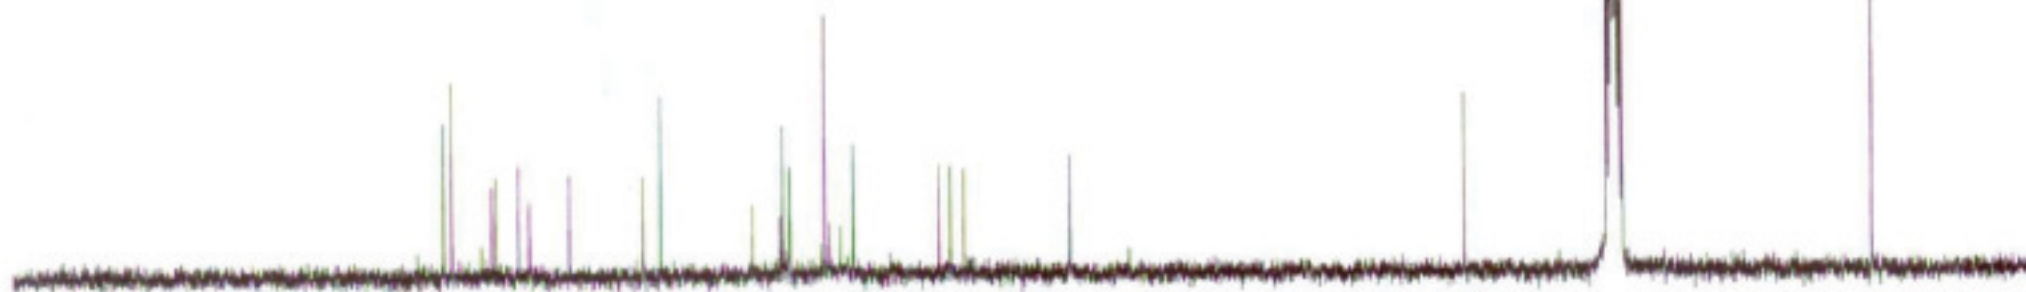

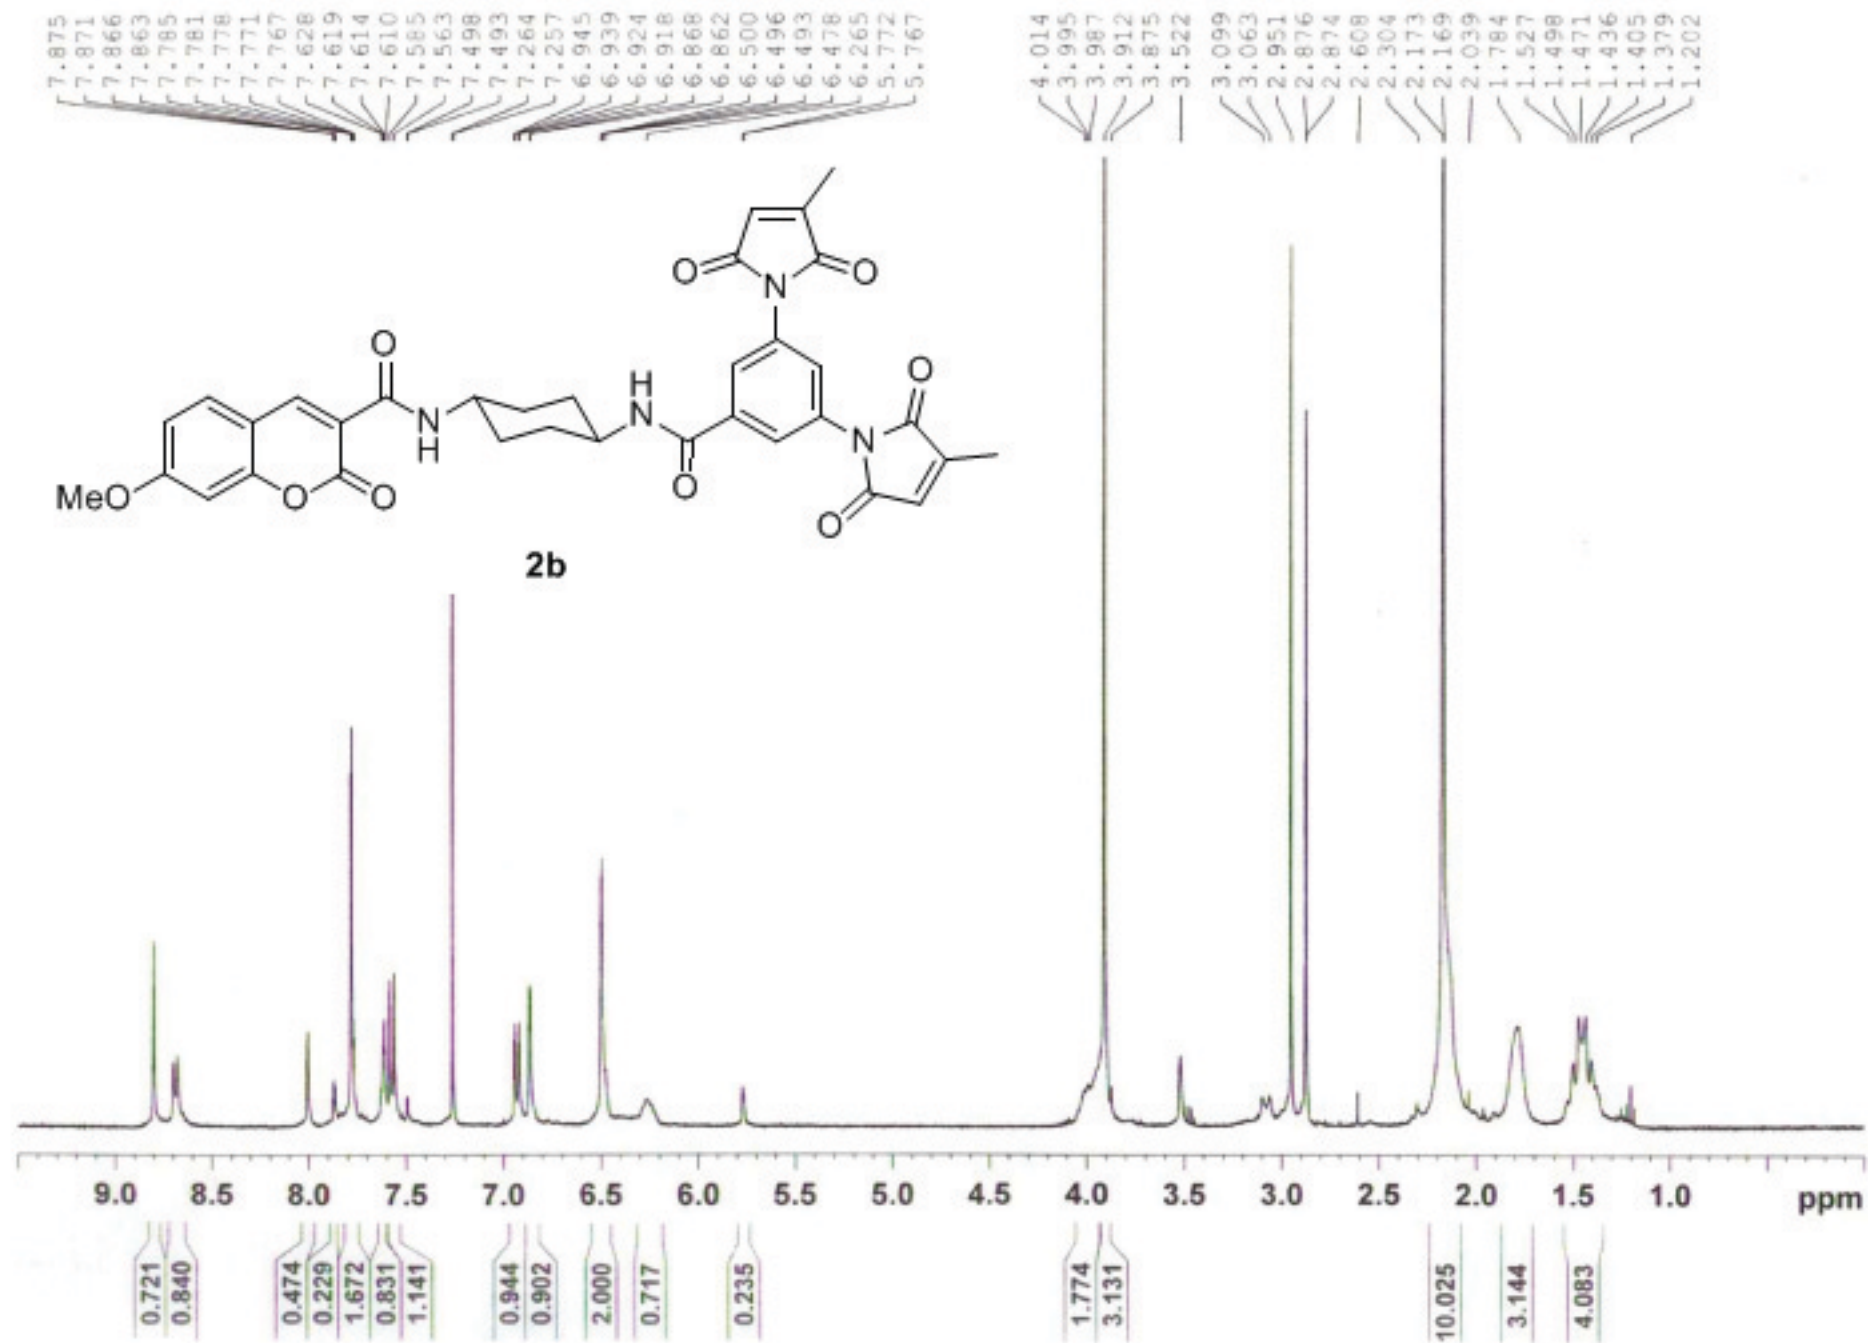



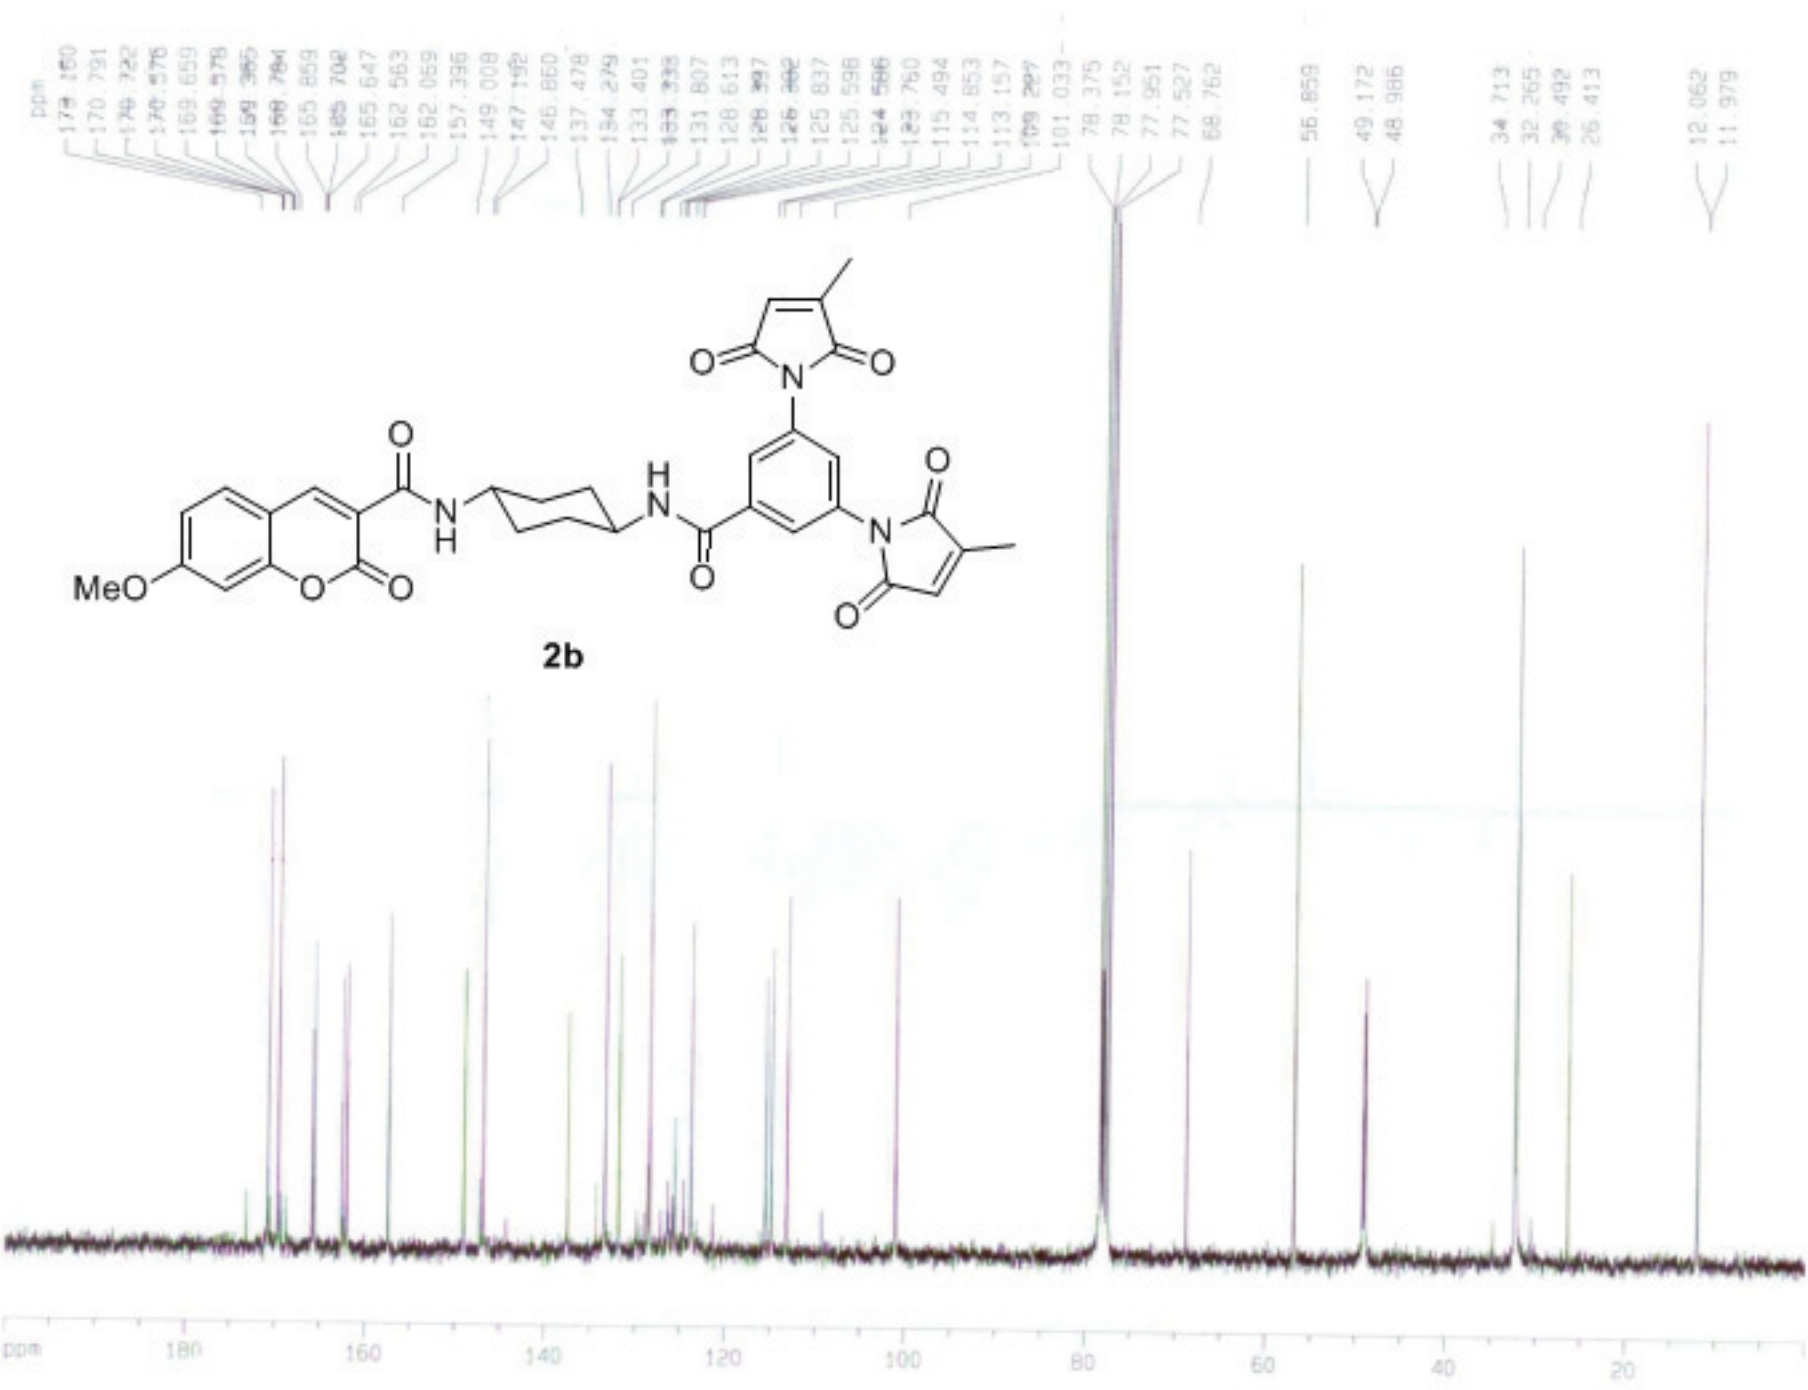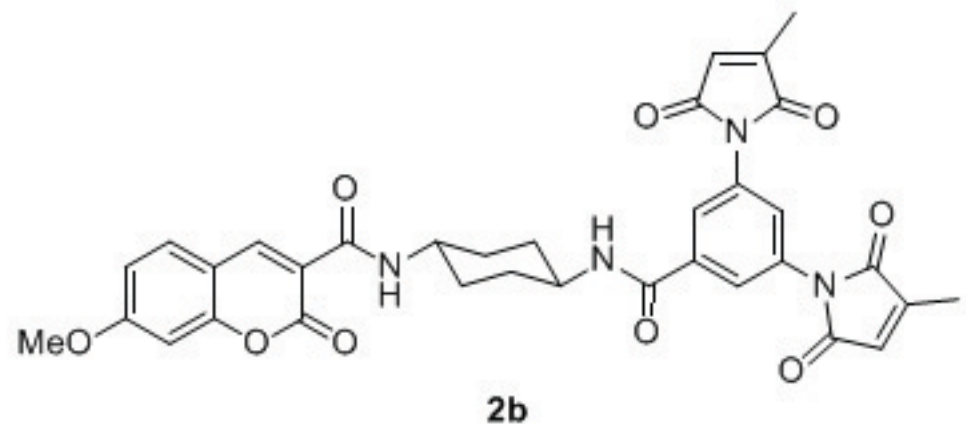

8.961  
8.942  
8.889  
8.863  
7.890  
7.820  
7.813  
7.709  
7.686  
7.603  
7.574  
7.467  
7.460  
7.455  
7.449  
7.442  
7.236  
6.869  
6.861  
6.840  
6.832  
6.779  
6.771  
6.456  
6.450  
6.444

4.018  
4.007  
3.993  
3.981  
3.834

2.336  
2.293  
2.132  
2.127  
1.836  
1.829  
1.807  
1.747  
1.715  
1.525  
1.410  
1.378  
1.348

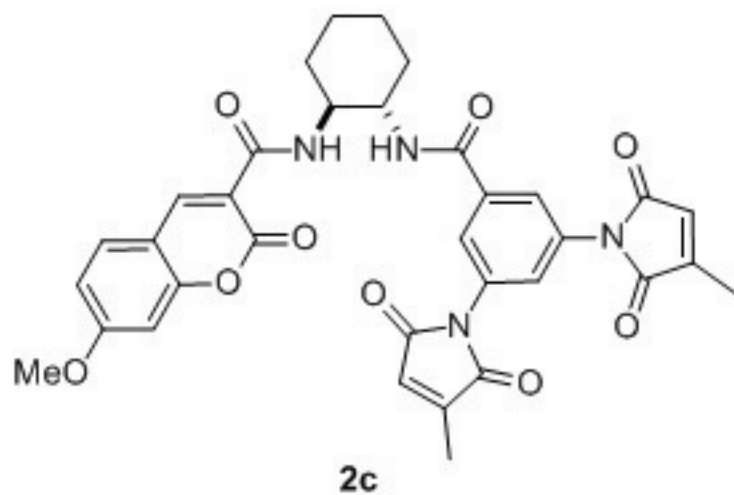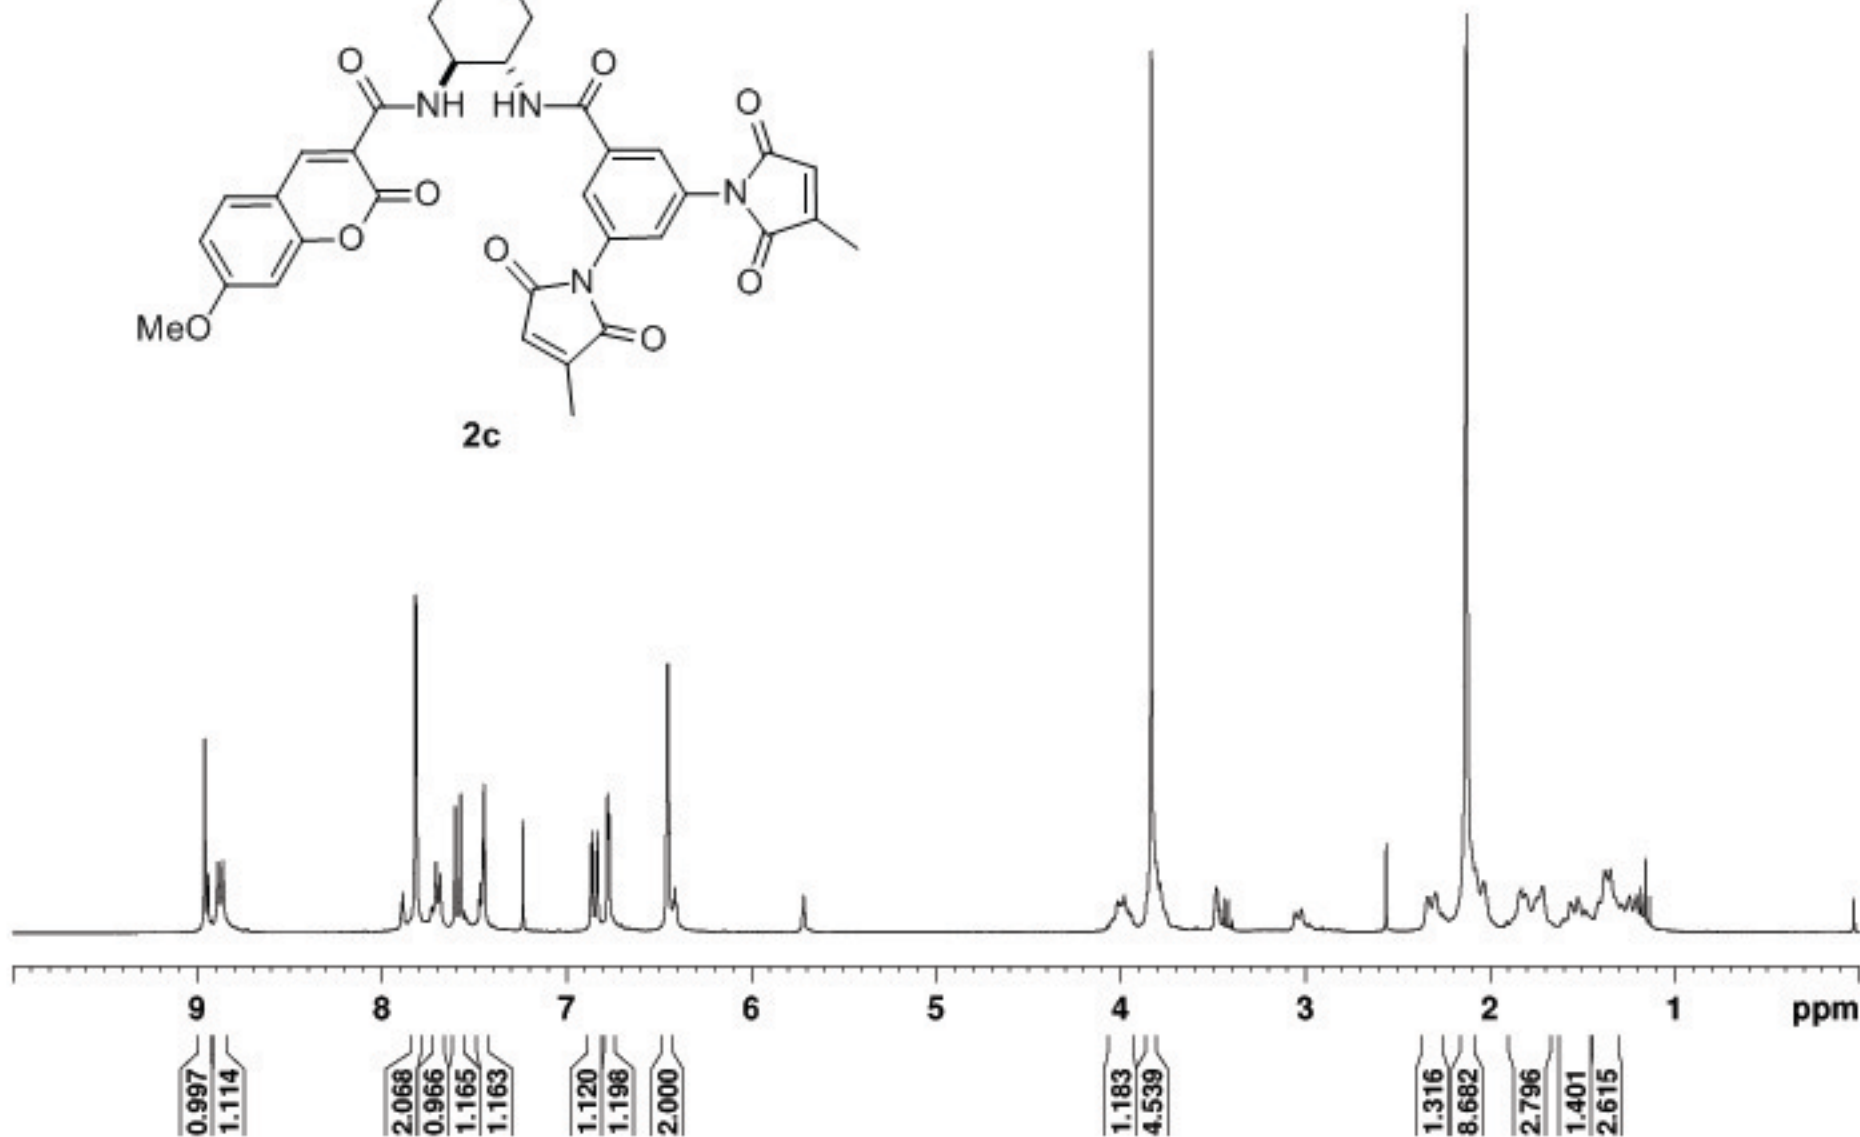

170.826  
169.671  
165.741  
165.414  
164.854  
162.492  
157.632

150.458  
146.811

137.155  
133.289  
133.192  
132.025  
128.437  
126.210  
124.371

114.860  
114.784  
113.417

100.923

58.194  
56.830  
53.029

33.009  
32.666  
25.819  
25.097

12.046

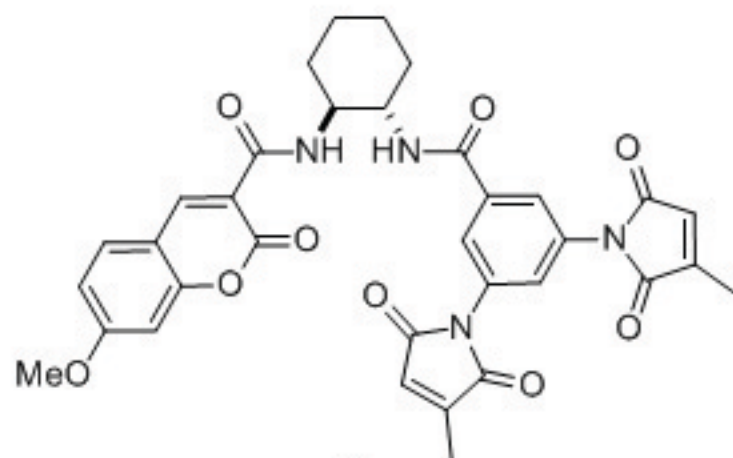

2c

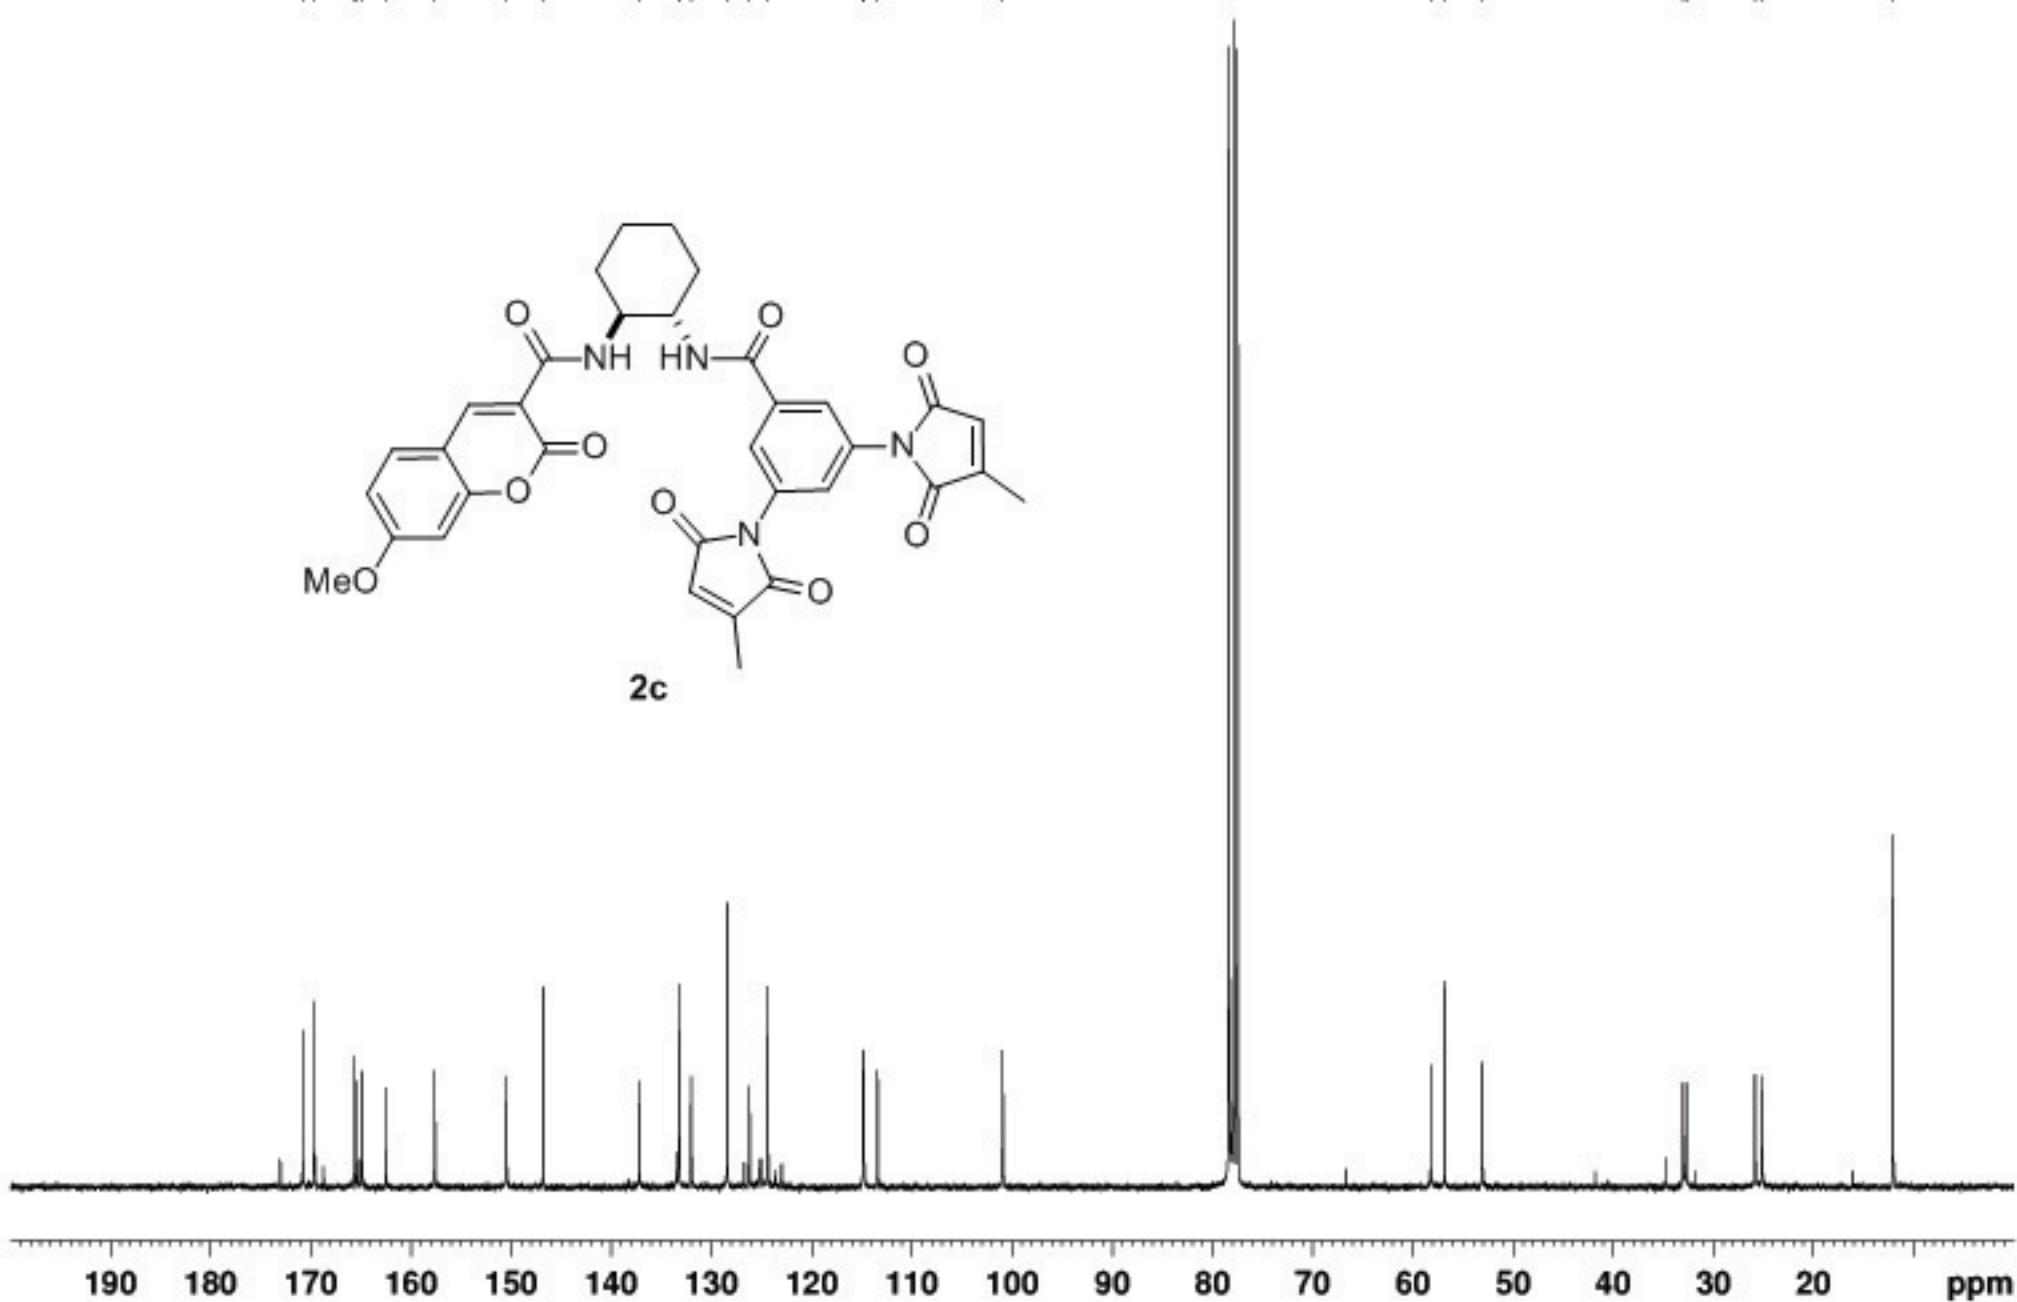

9.346  
 9.322  
 9.040  
 9.023  
 7.976  
 7.972  
 7.897  
 7.891  
 7.633  
 7.625  
 7.618  
 7.609  
 7.603  
 7.597  
 7.519  
 7.512  
 7.272  
 6.987  
 6.979  
 6.958  
 6.950  
 6.908  
 6.901  
 6.505  
 6.487  
 6.481  
 6.476  
 6.467  
 4.144  
 4.120  
 3.942  
 3.928  
 3.918  
 3.904  
 3.527  
 2.192  
 2.186  
 2.179  
 2.172  
 2.055  
 1.922  
 1.837  
 1.811  
 1.757  
 1.713  
 1.608  
 1.547  
 1.521  
 1.293  
 1.269  
 1.246  
 0.092  
 0.080  
 0.068

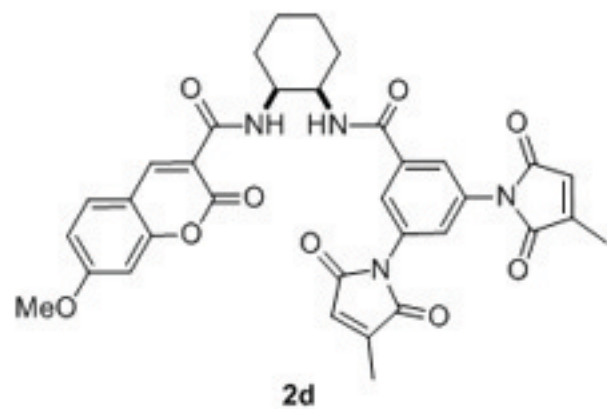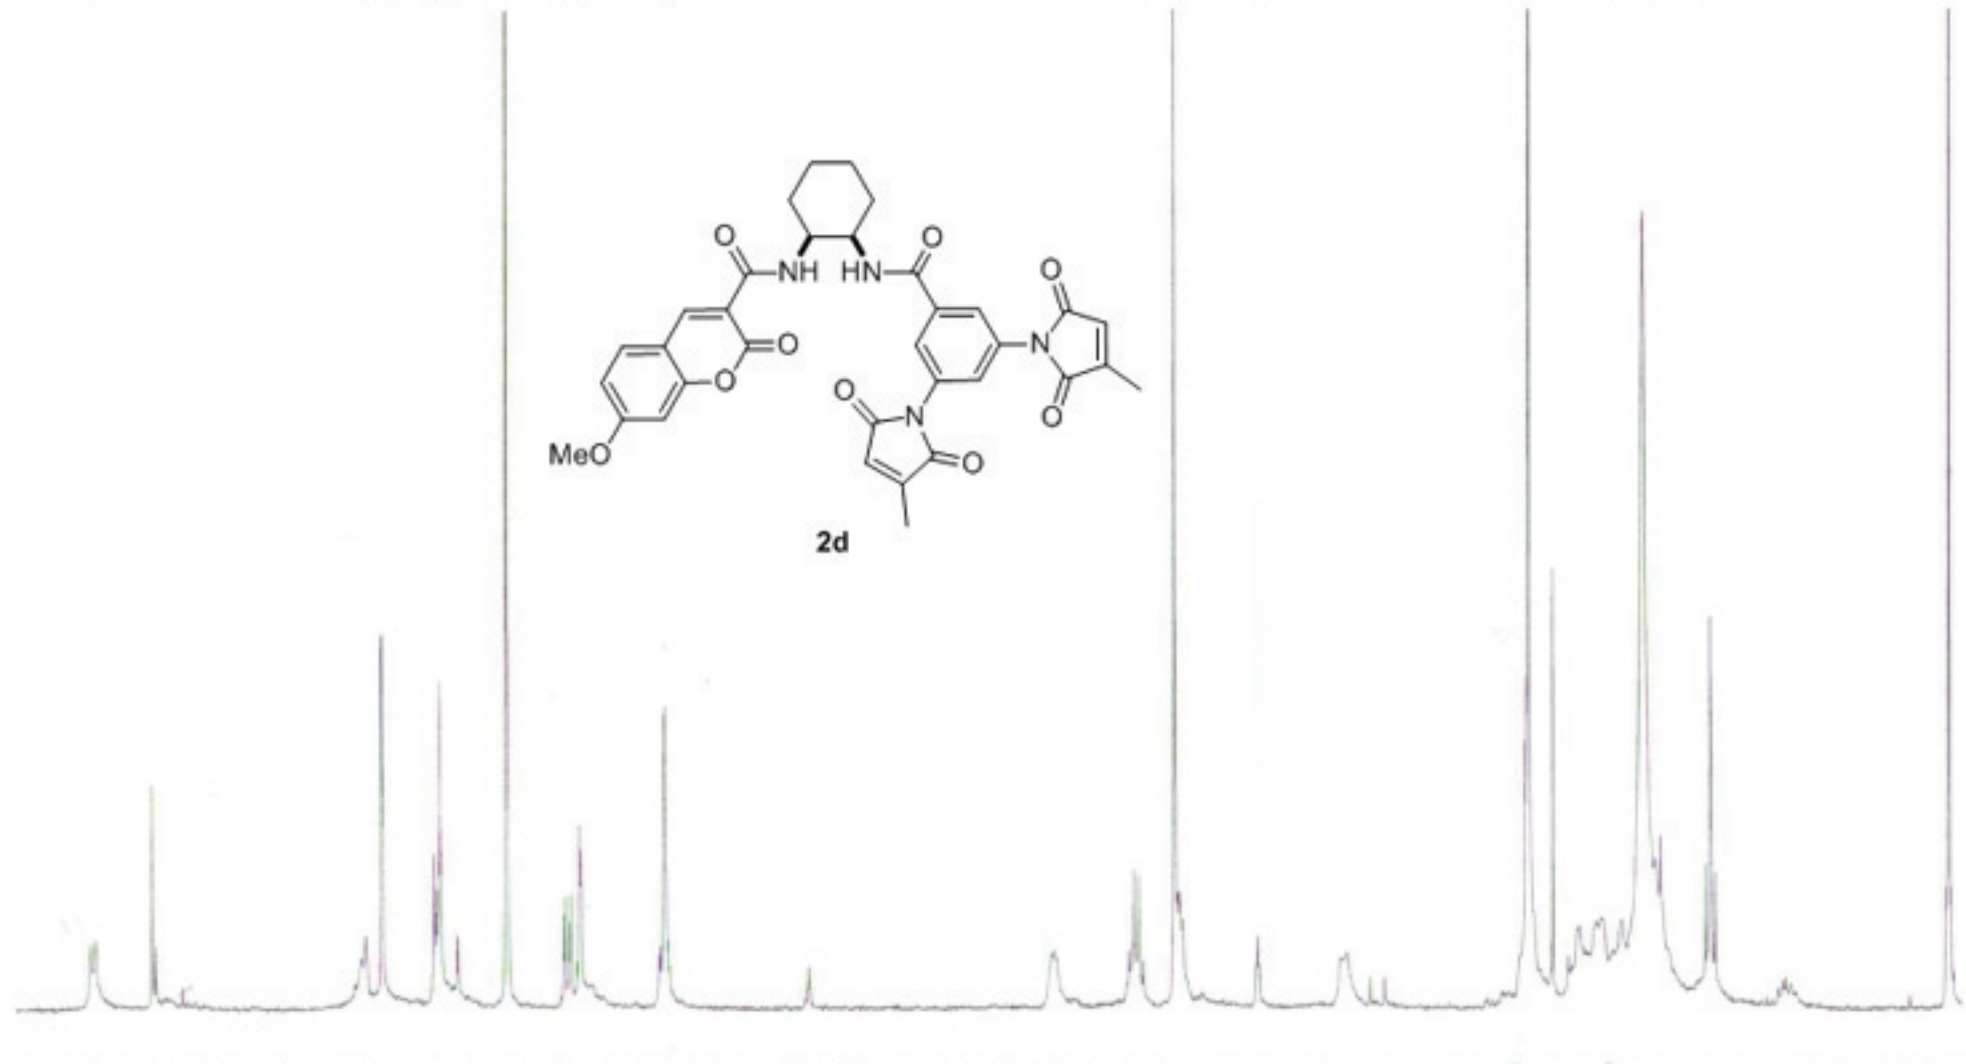

9.5 9.0 8.5 8.0 7.5 7.0 6.5 6.0 5.5 5.0 4.5 4.0 3.5 3.0 2.5 2.0 1.5 1.0 ppm

0.997  
 0.793  
 1.168  
 1.676  
 2.205  
 0.998  
 1.117  
 2.090  
 1.106  
 1.643  
 4.200  
 0.438  
 1.301  
 8.069  
 1.279  
 2.060  
 2.894  
 1.617  
 15.521  
 2.965

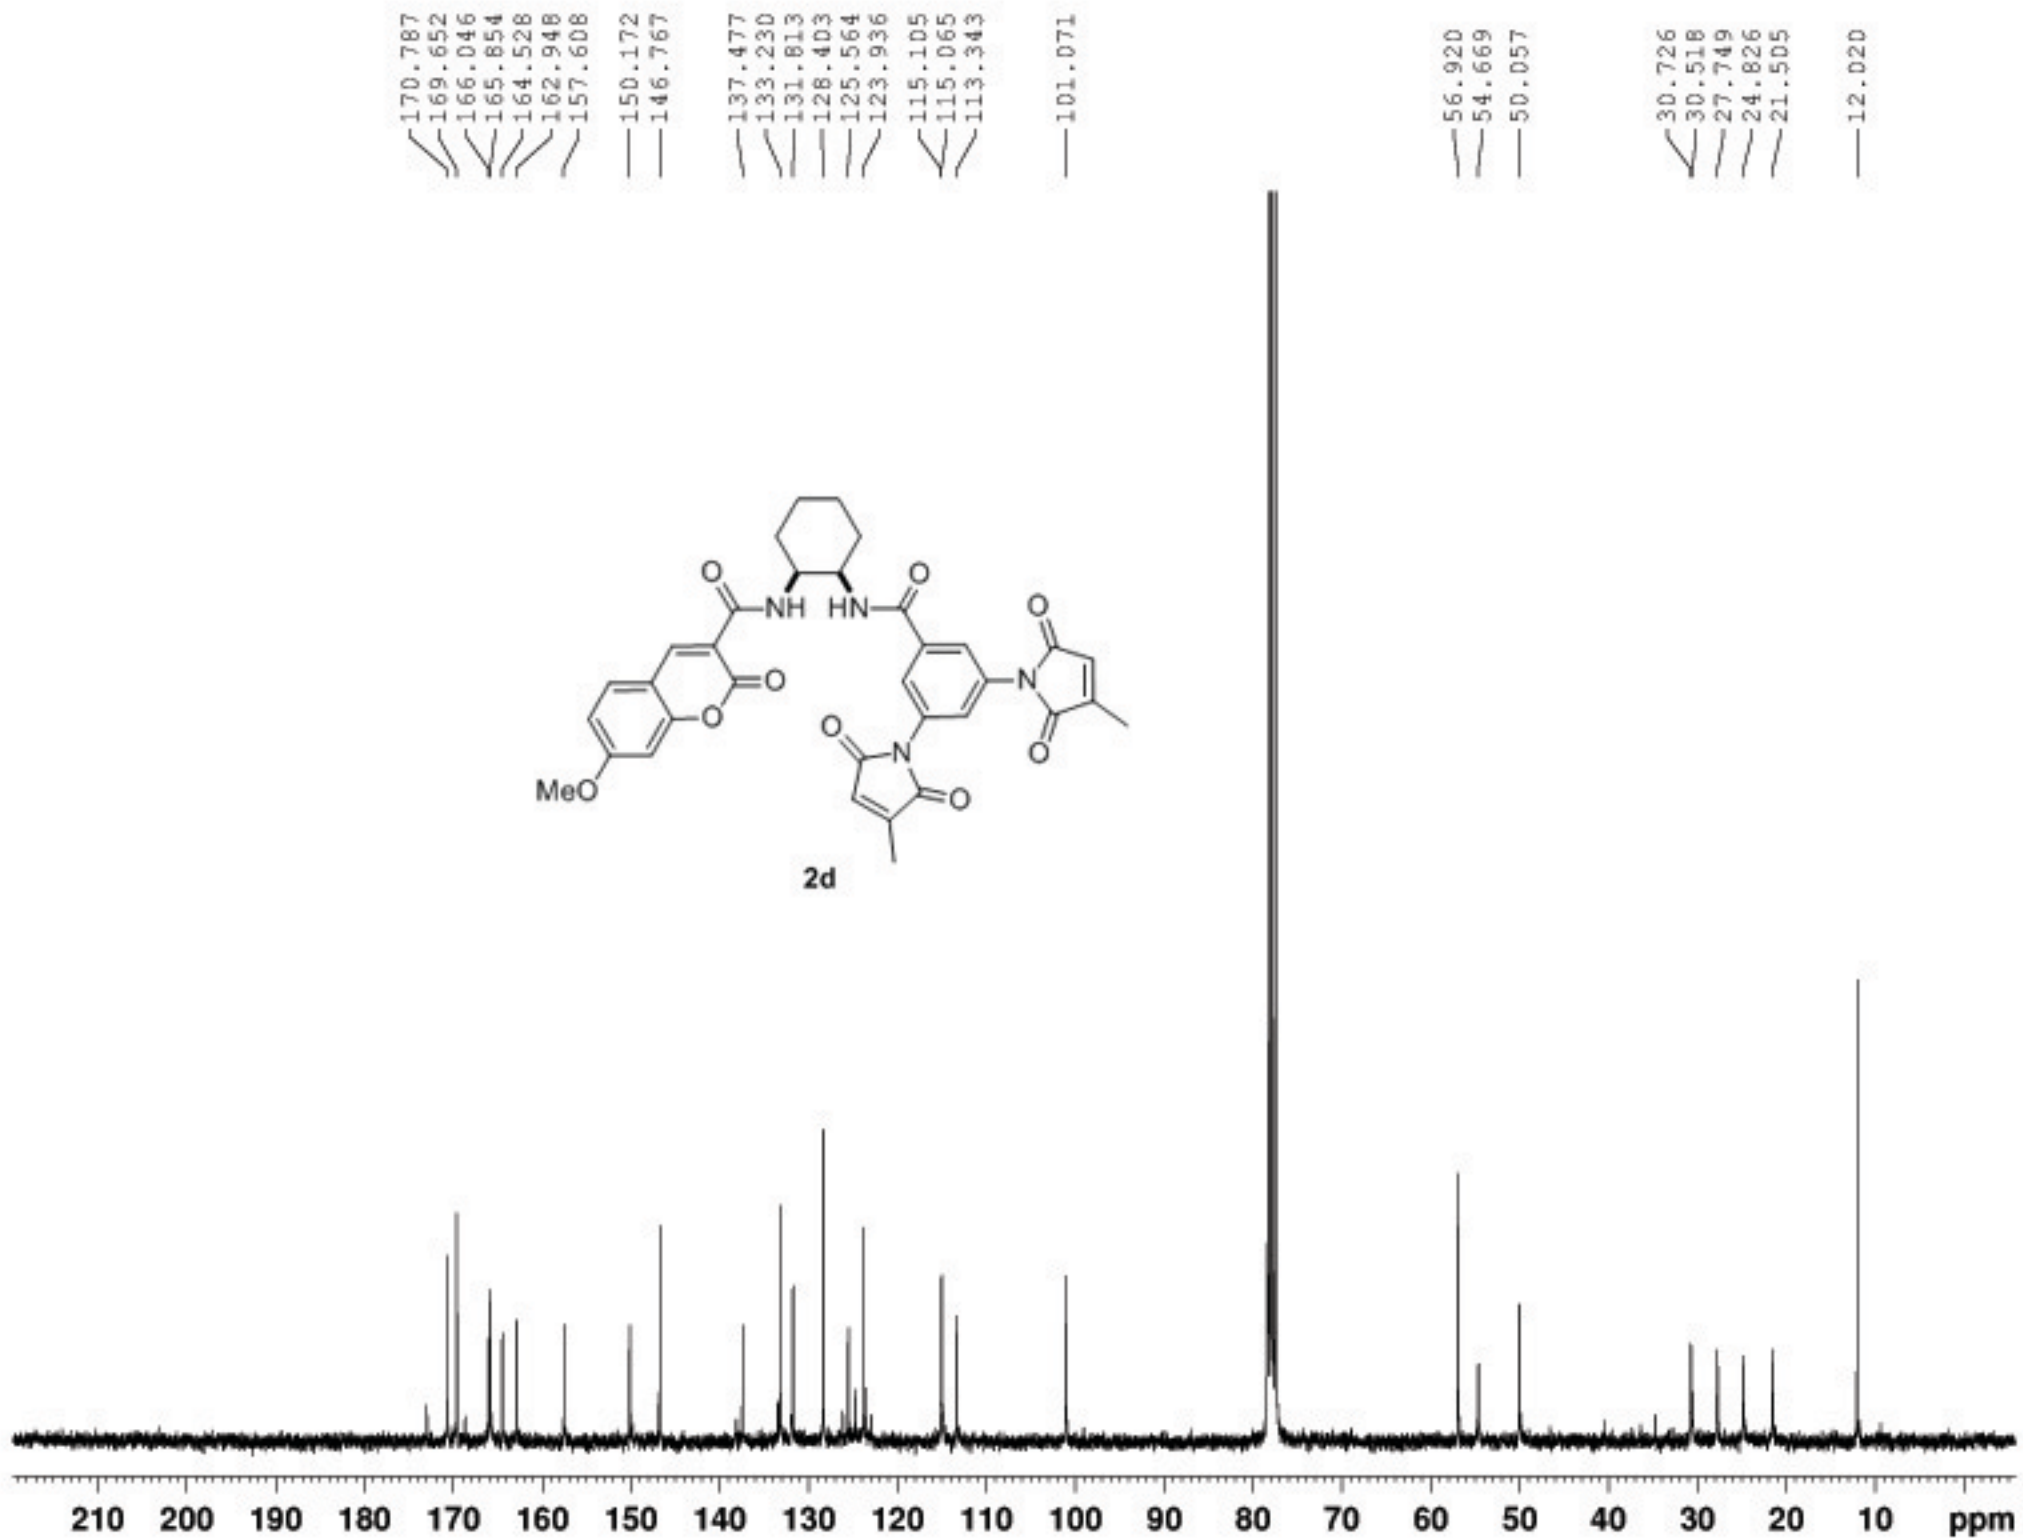

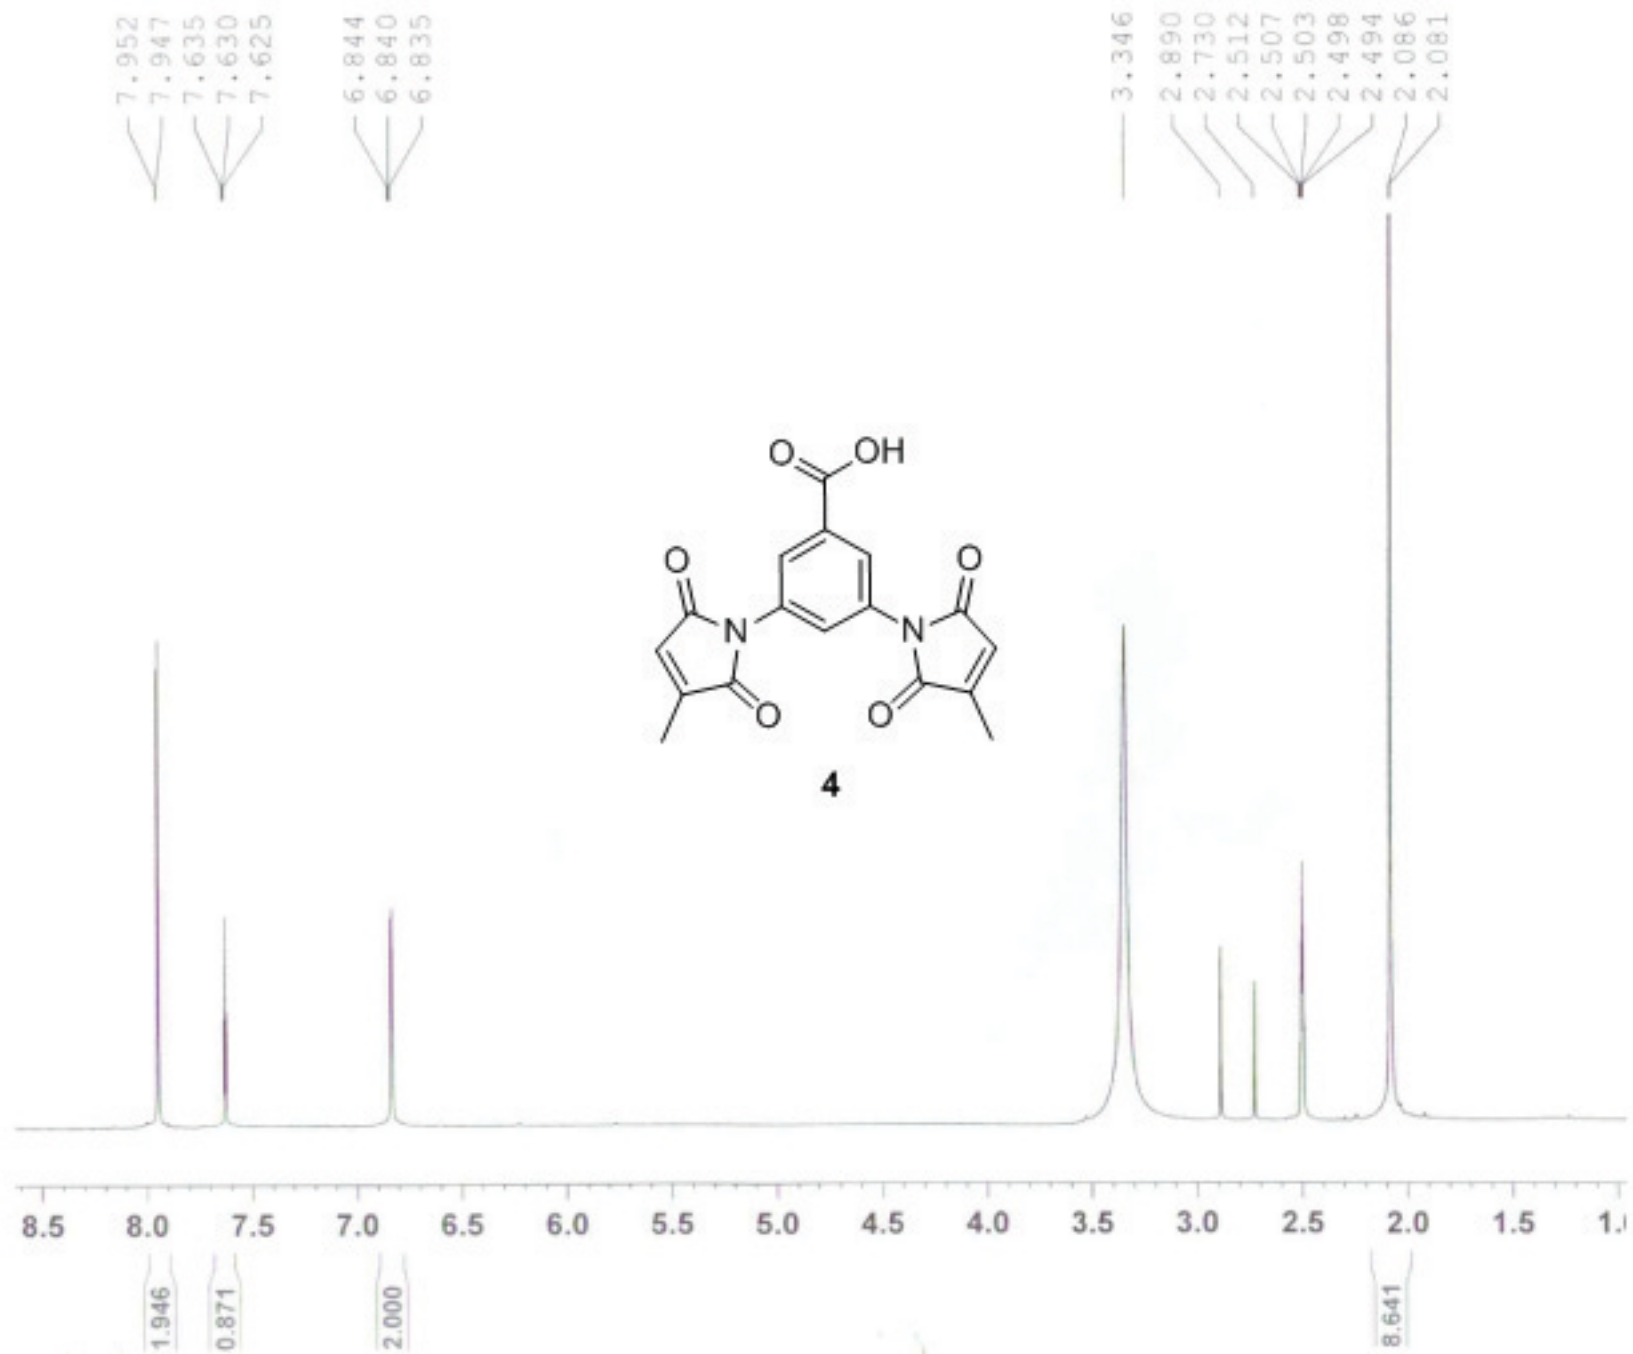



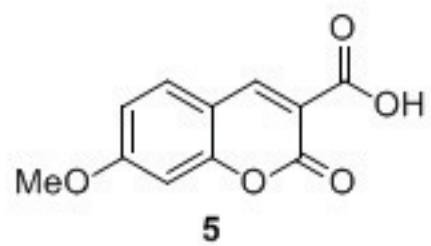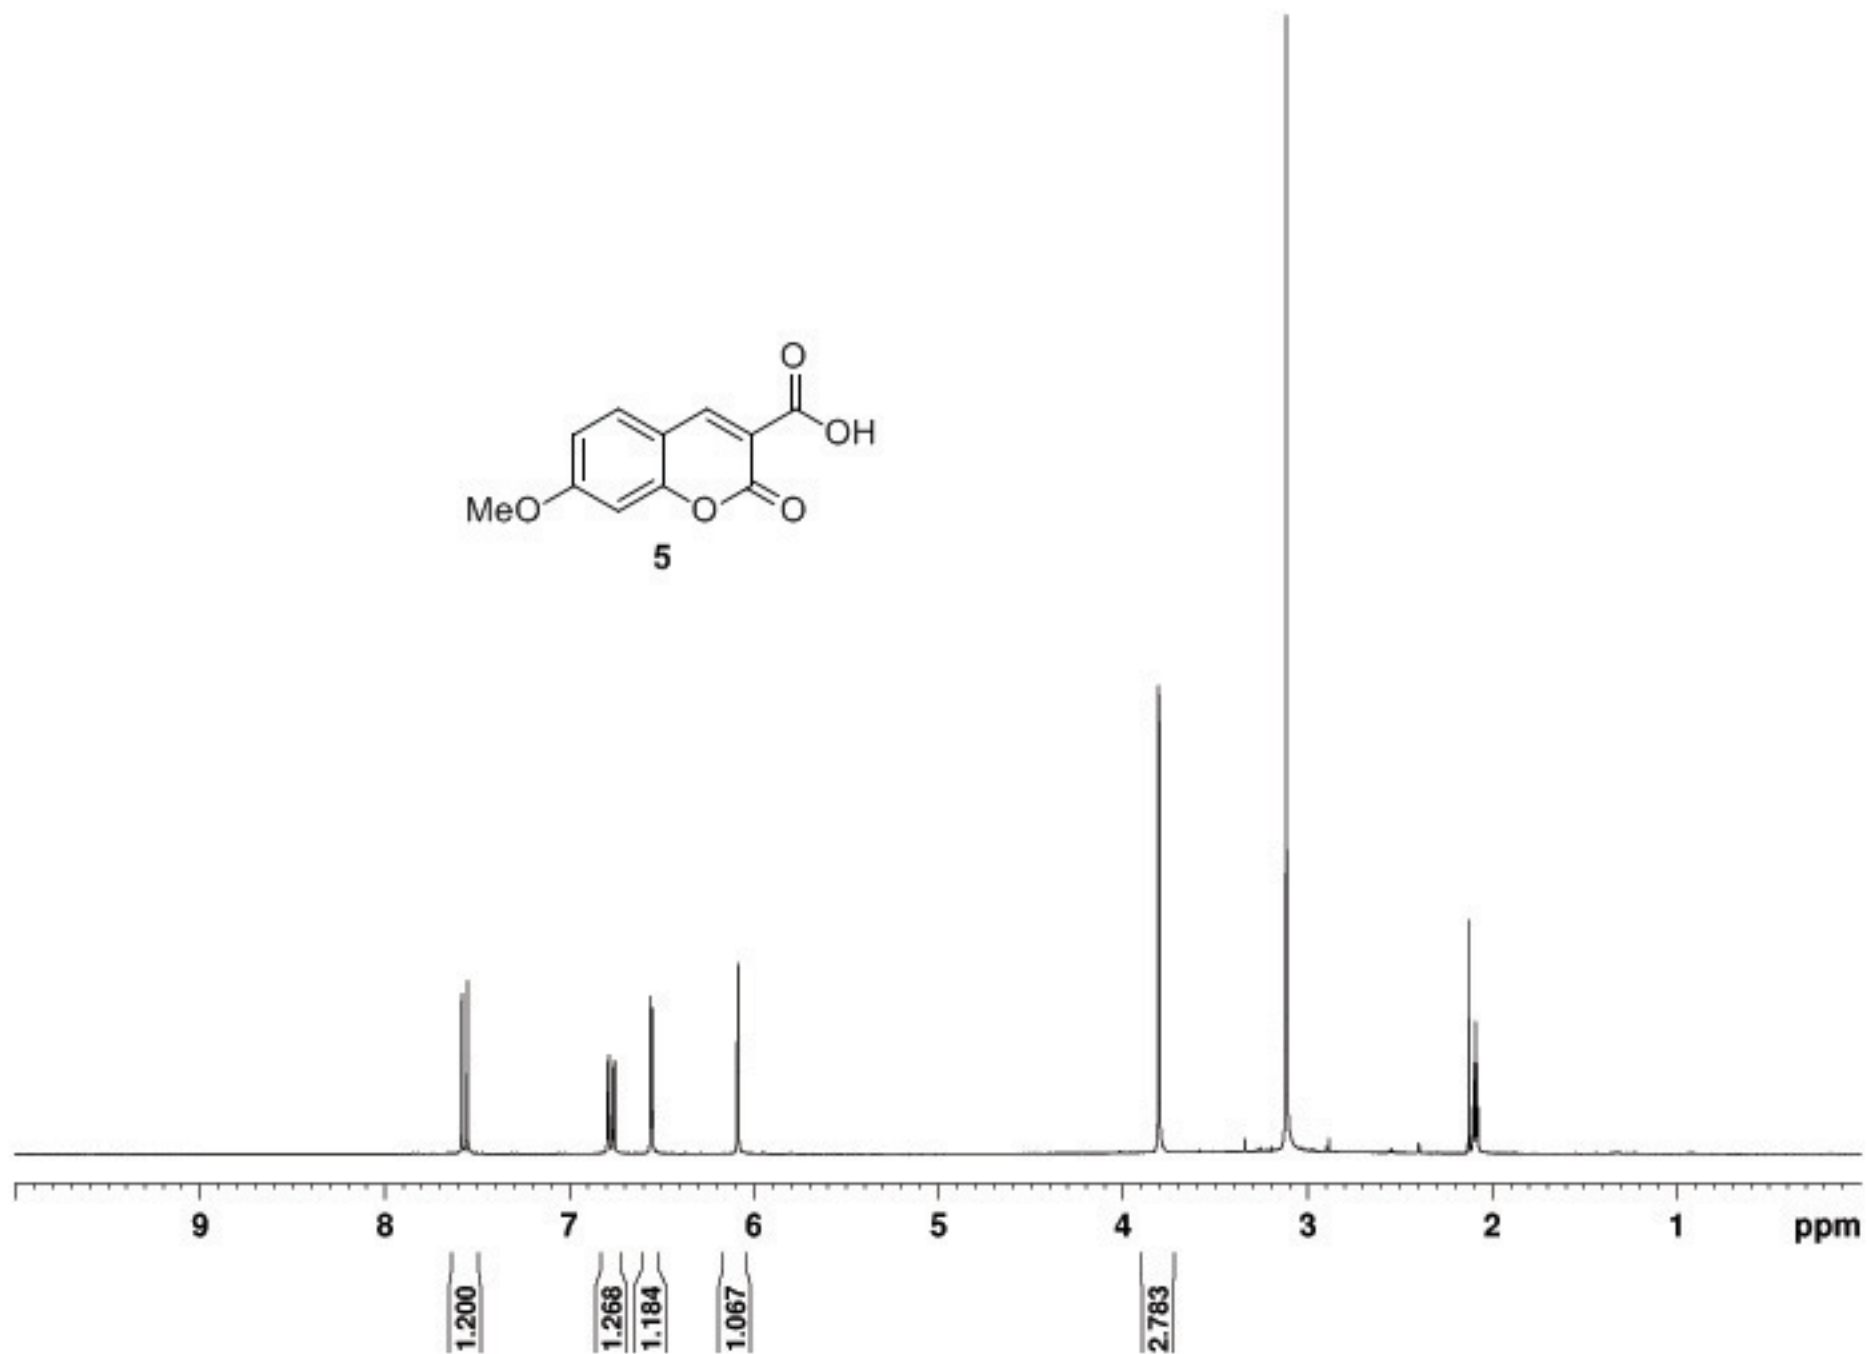

165.925  
165.450  
158.463  
158.173  
150.394

132.835

115.058  
114.583  
112.876

101.525

57.517

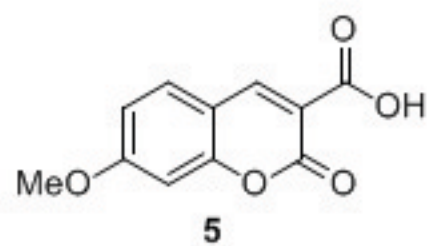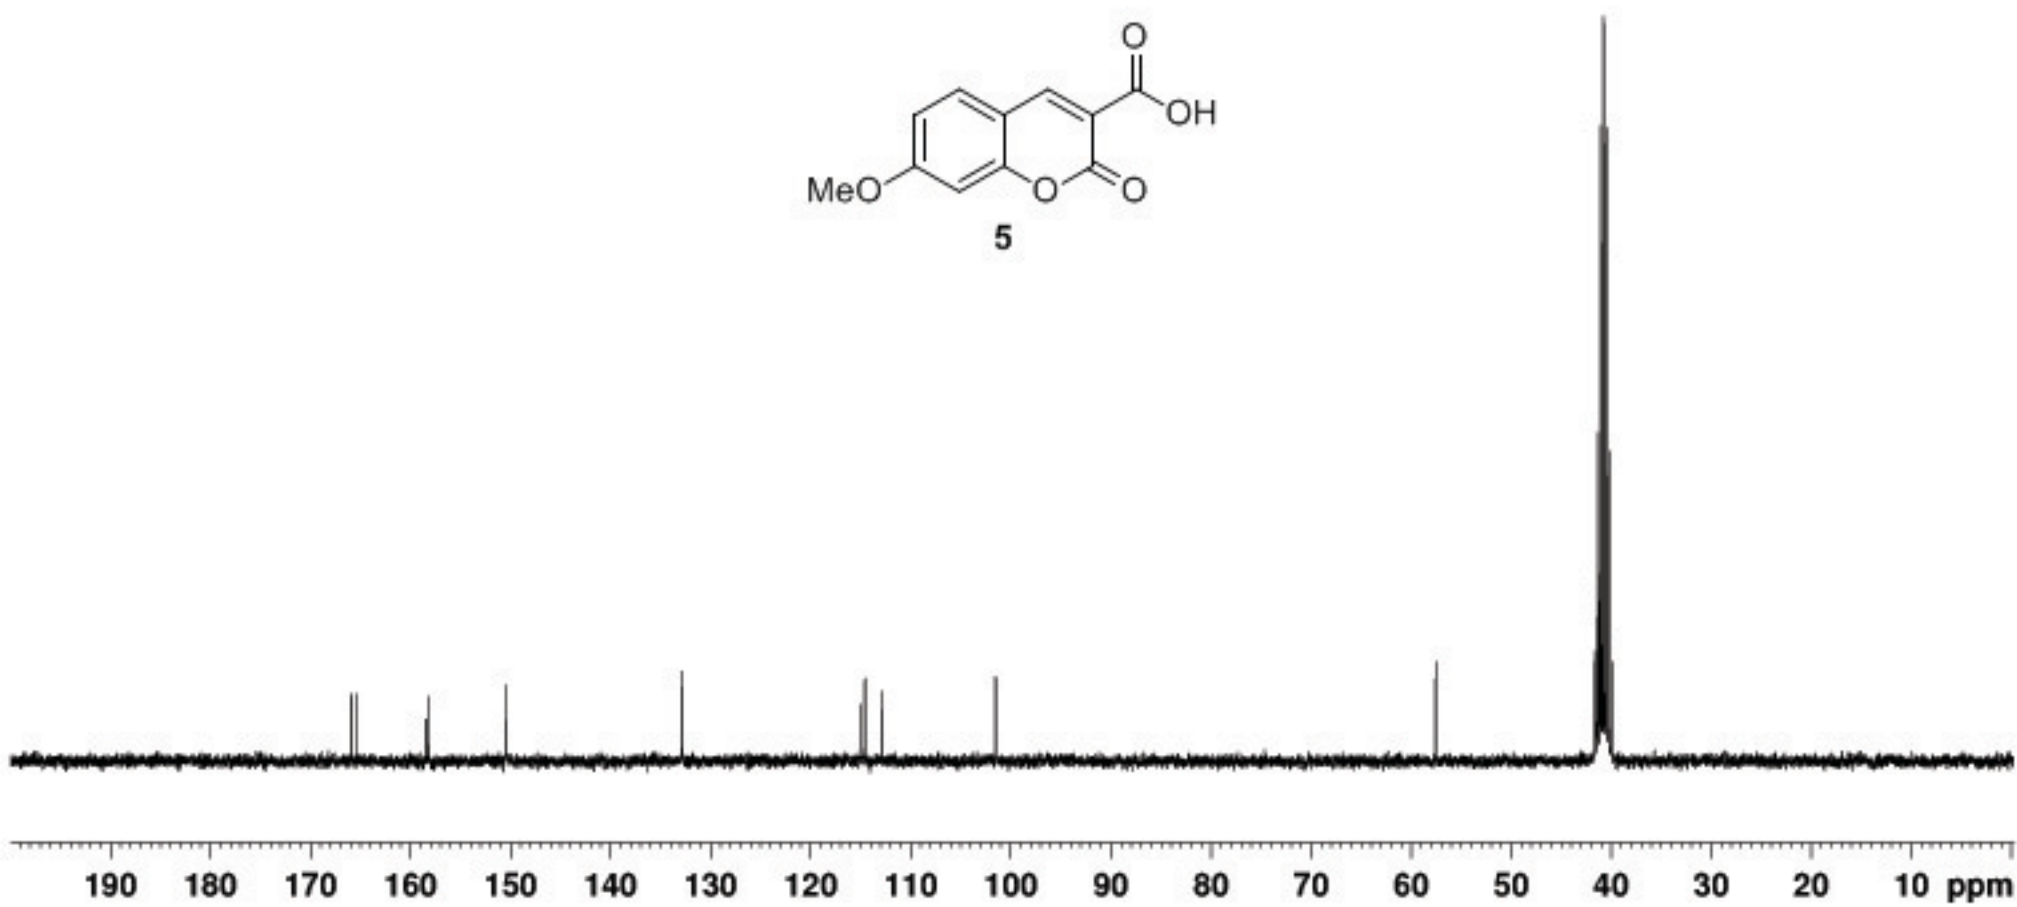

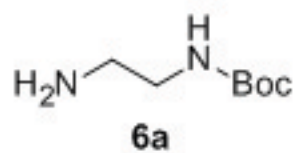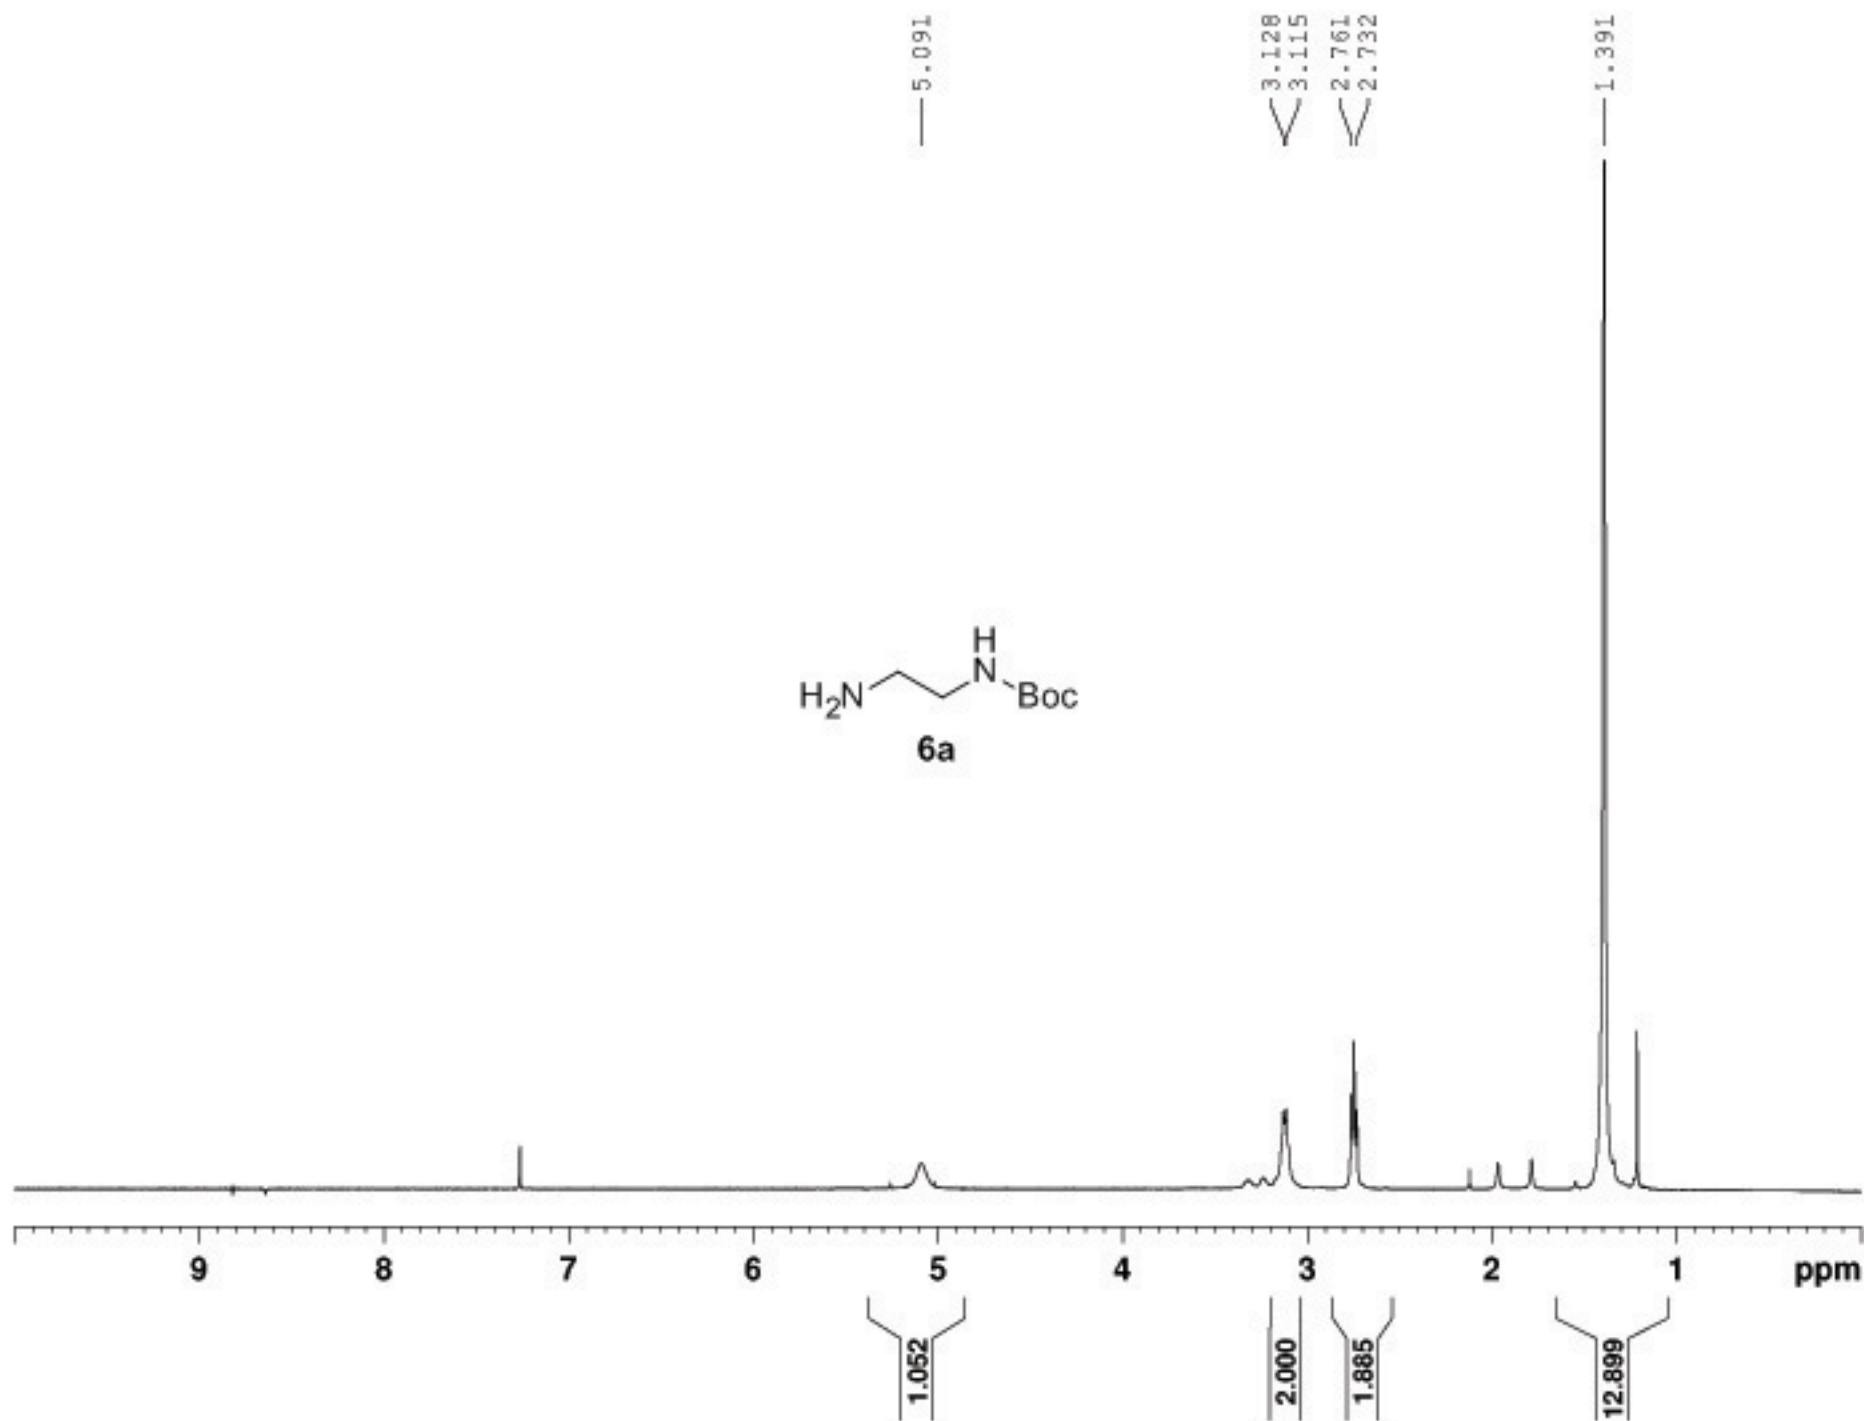

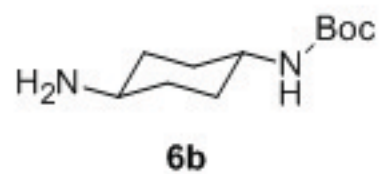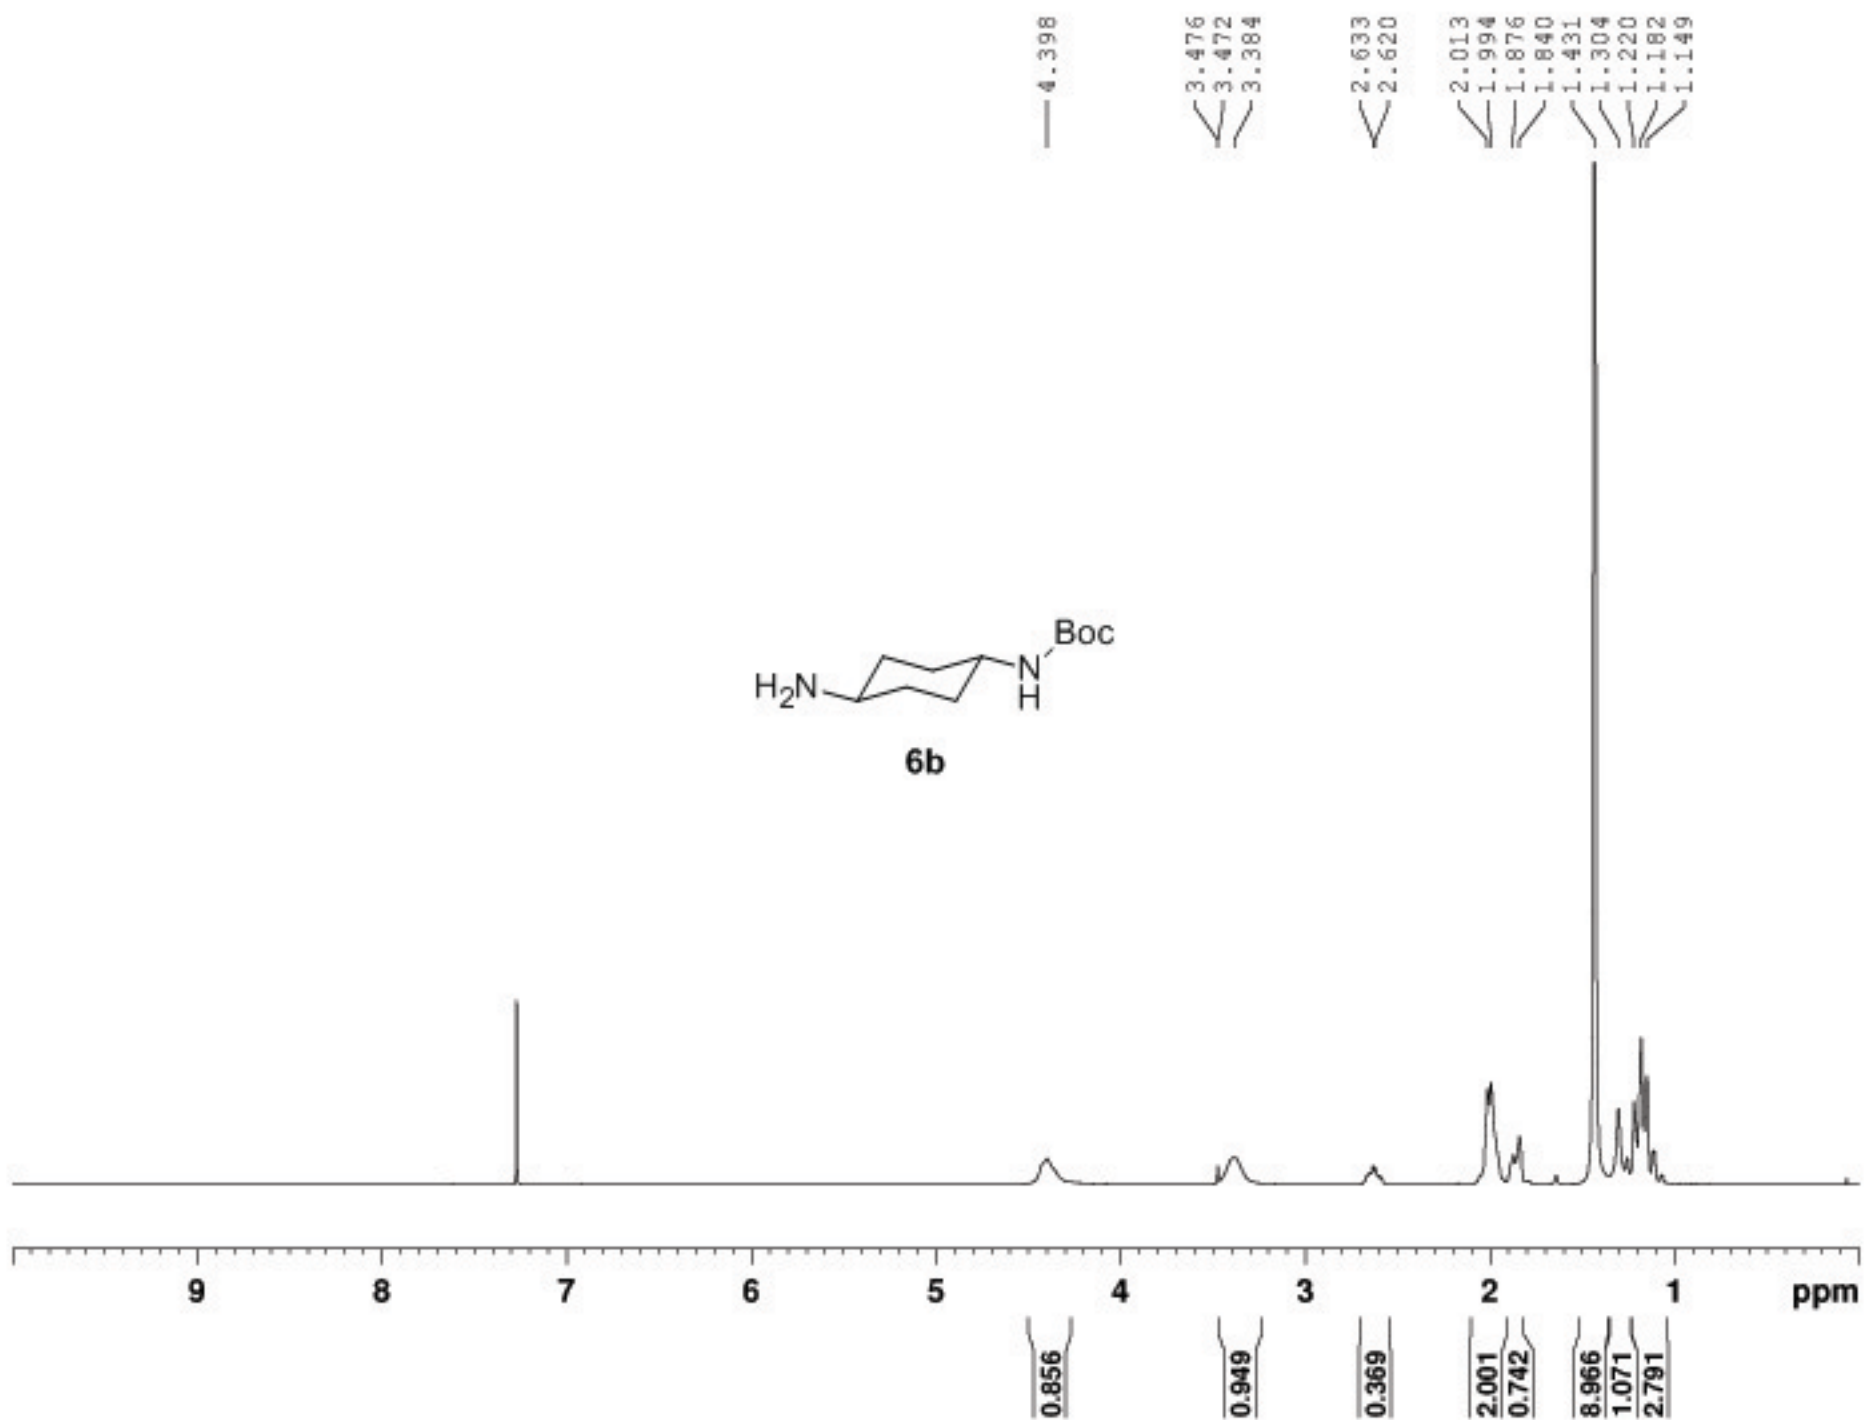

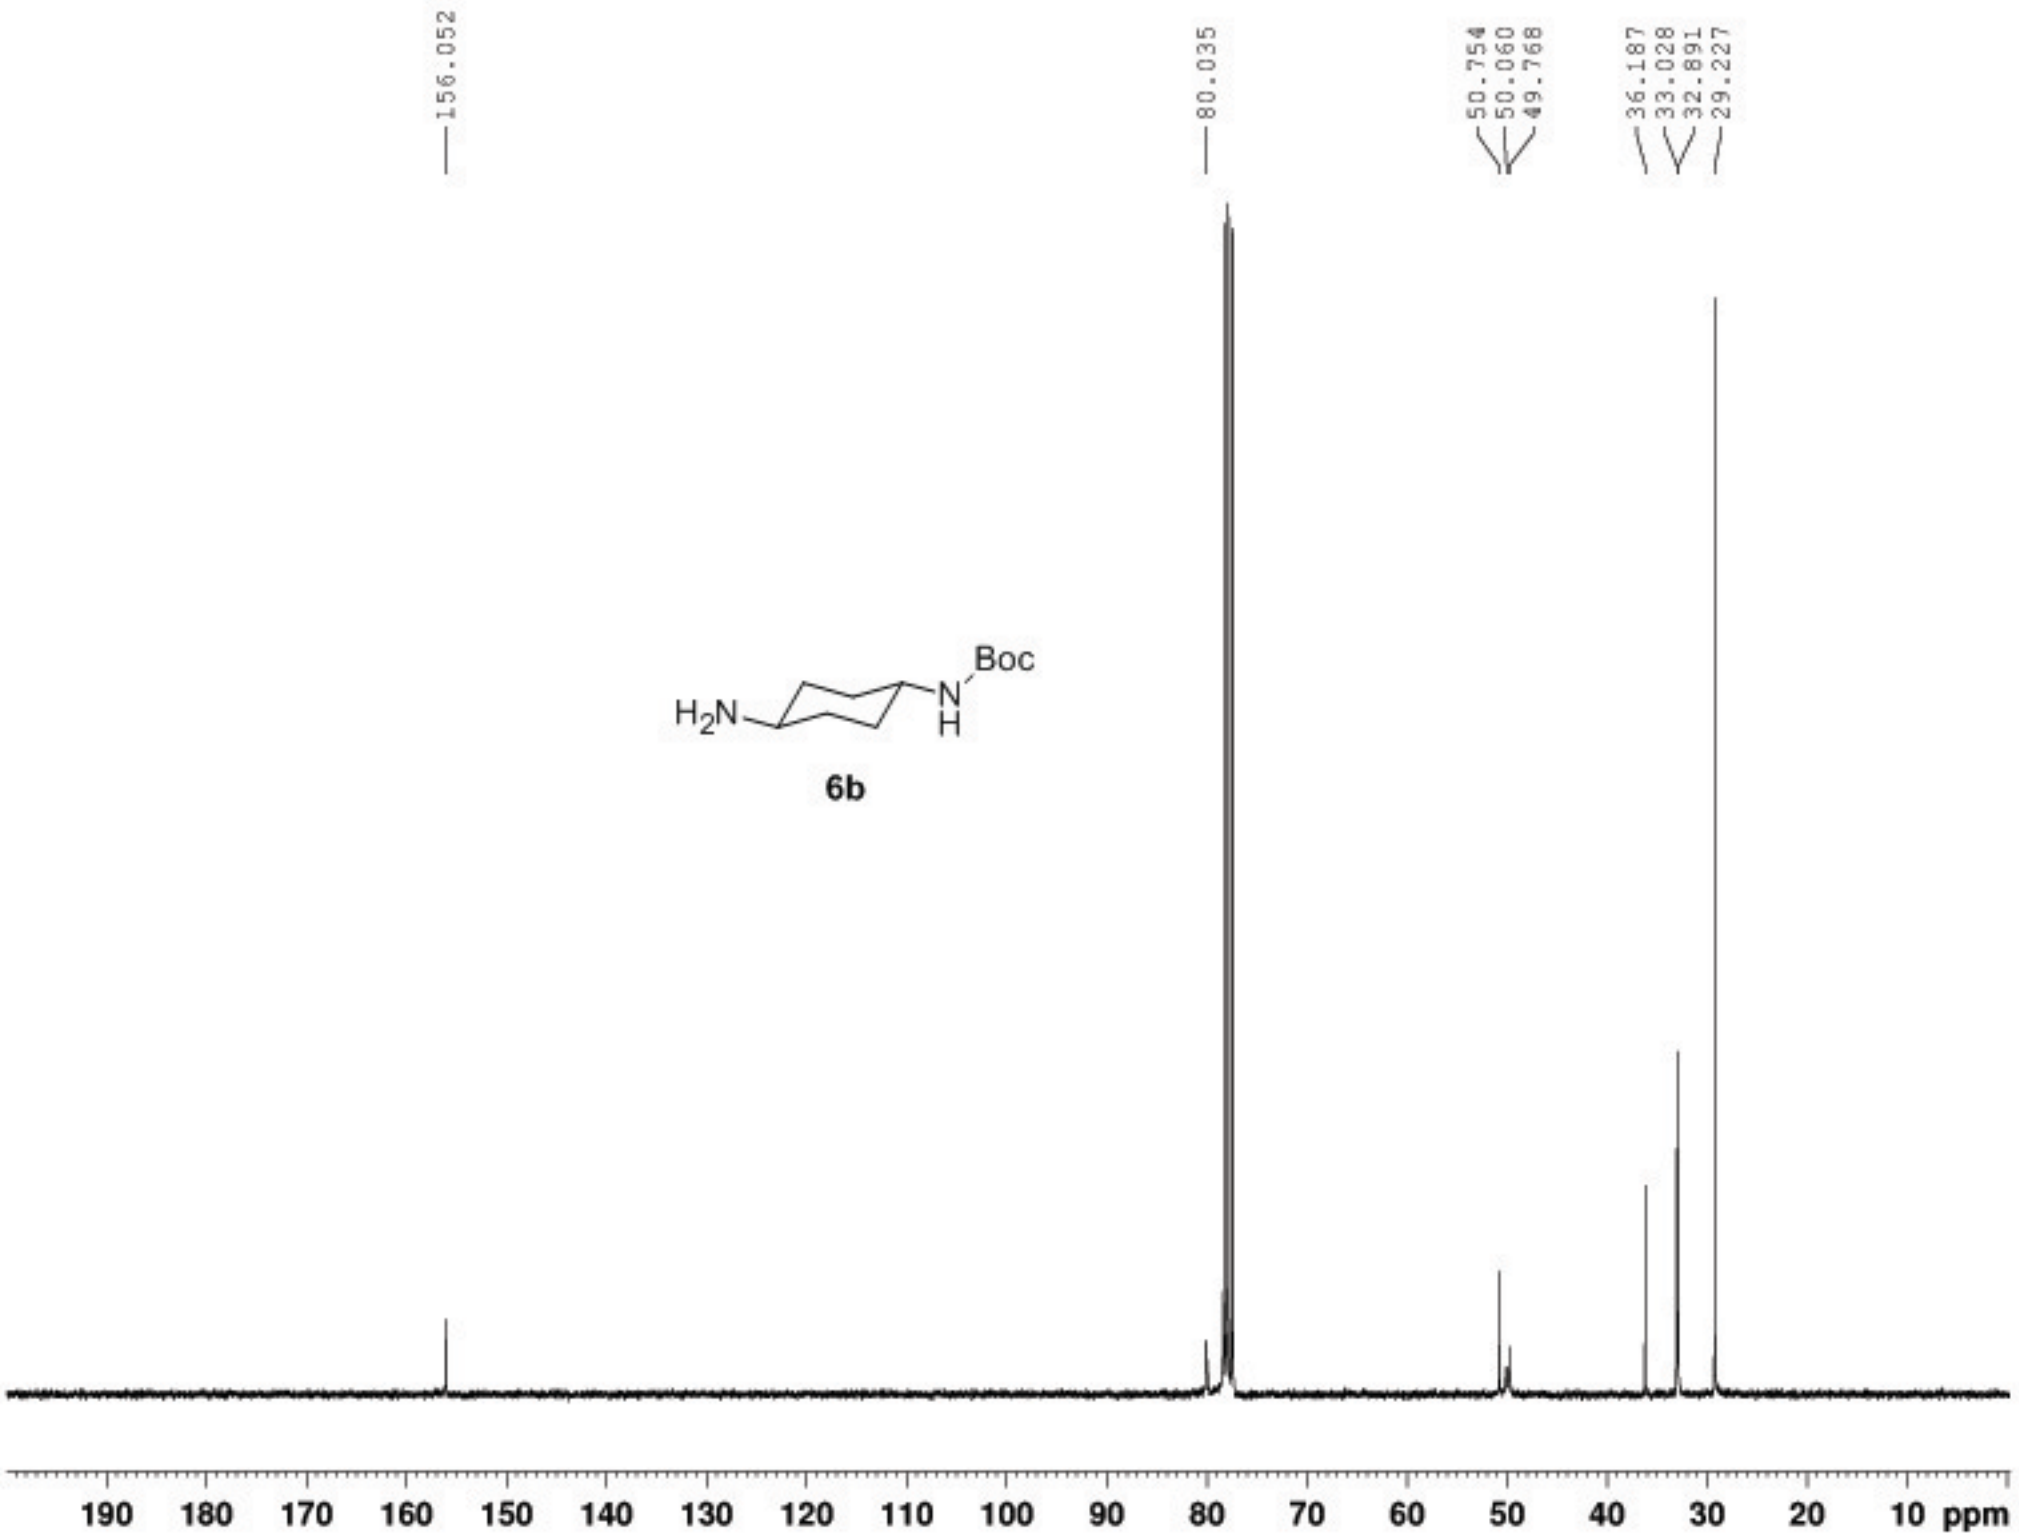

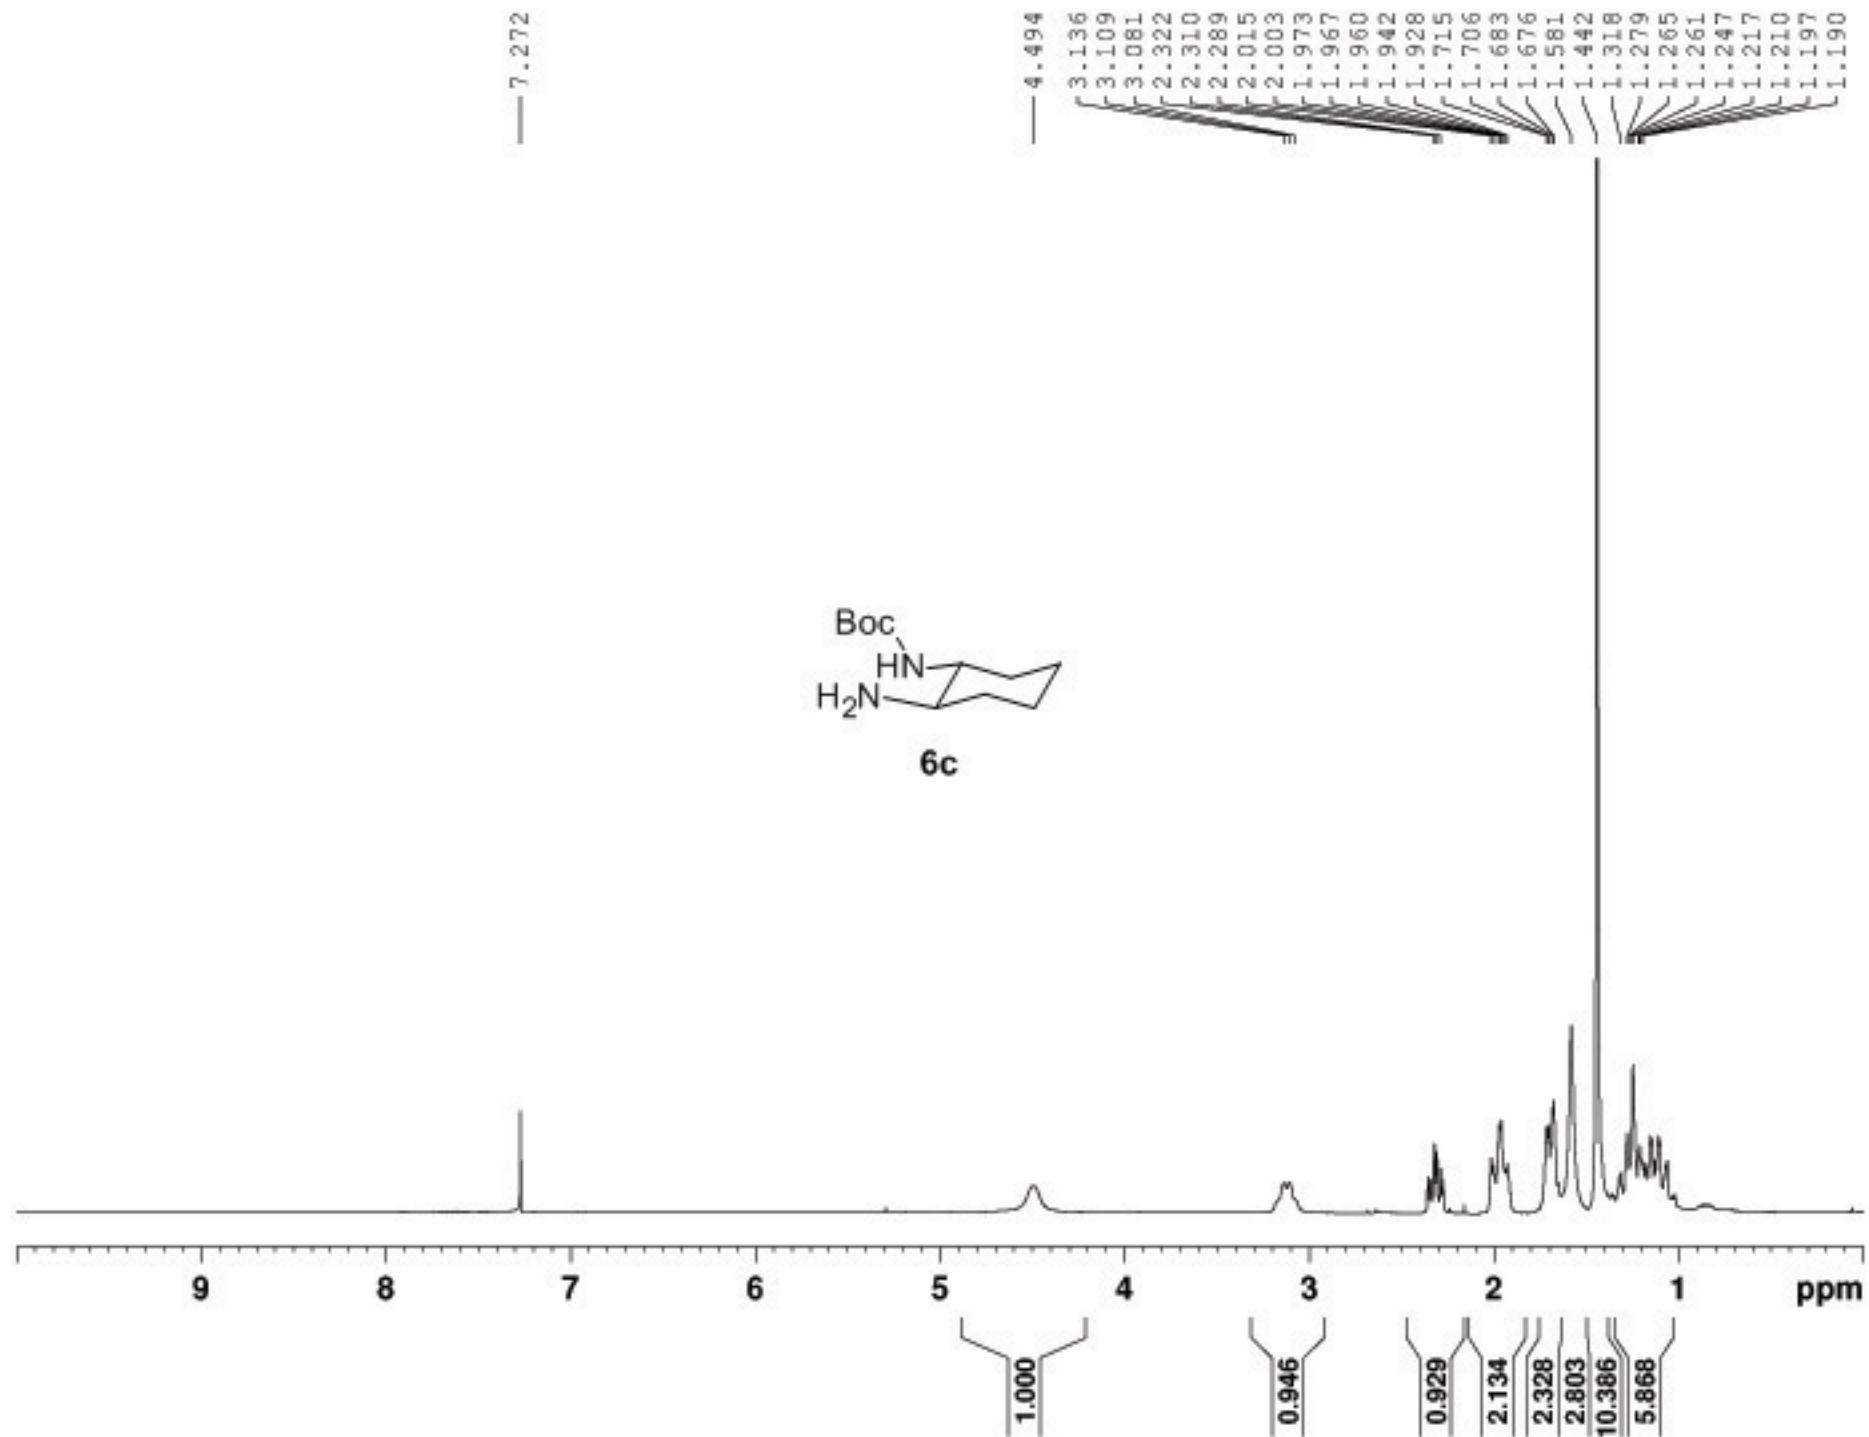



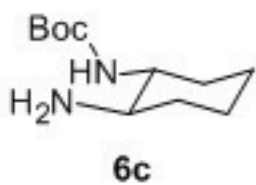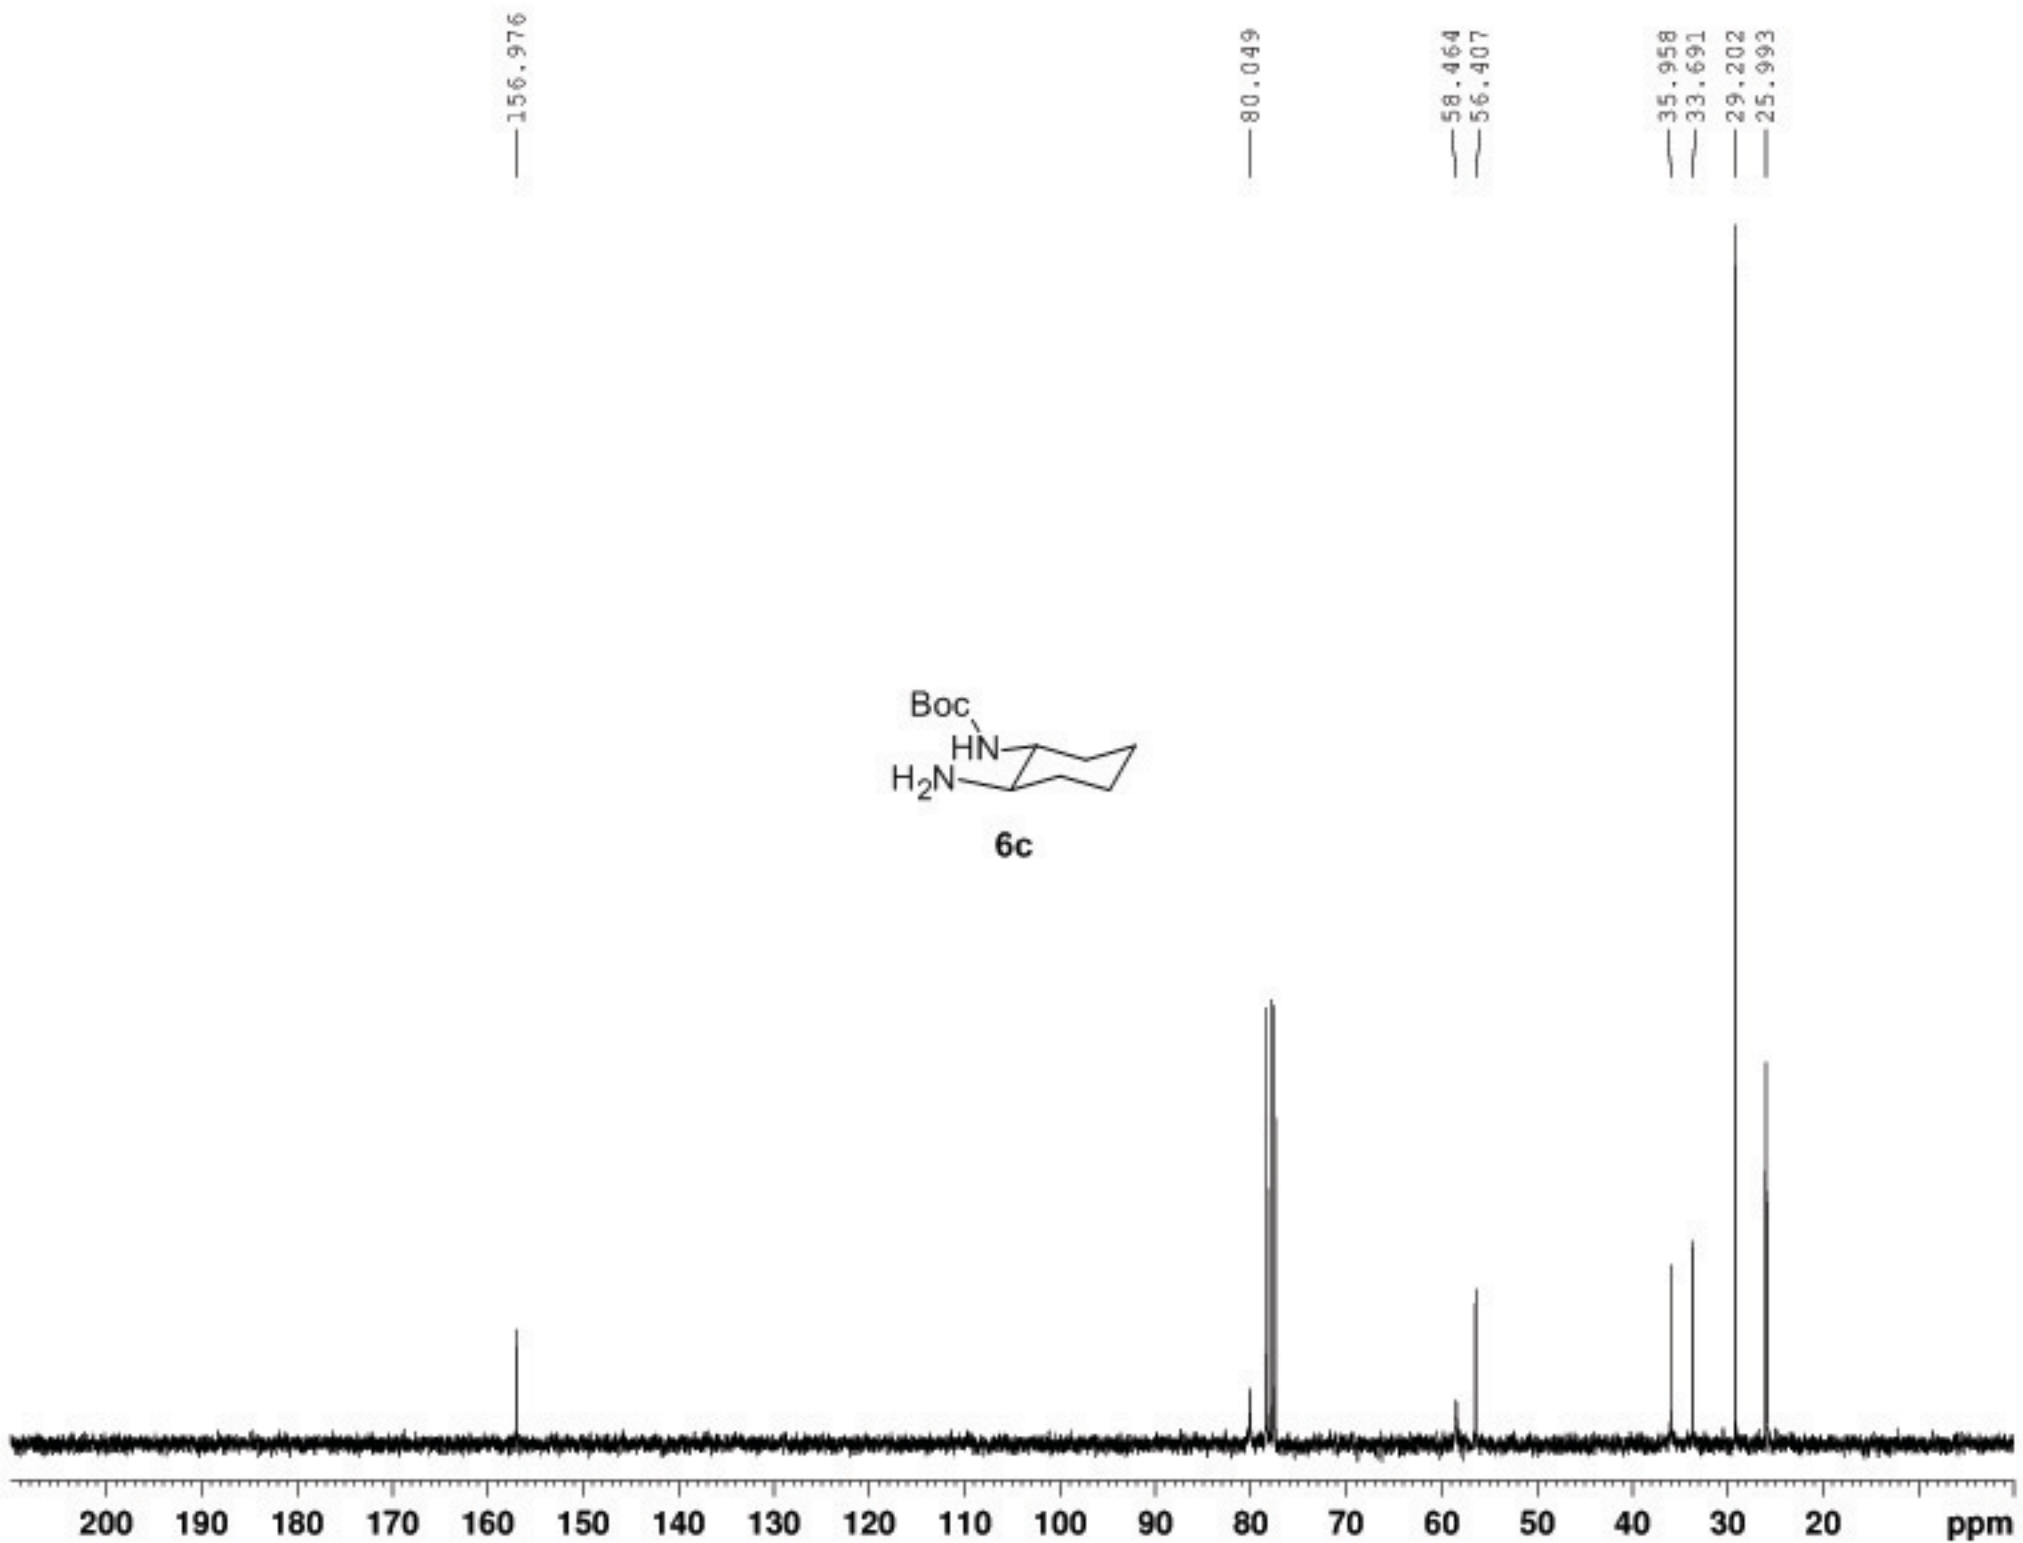

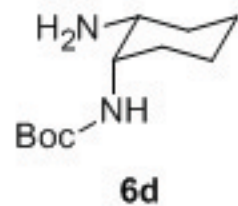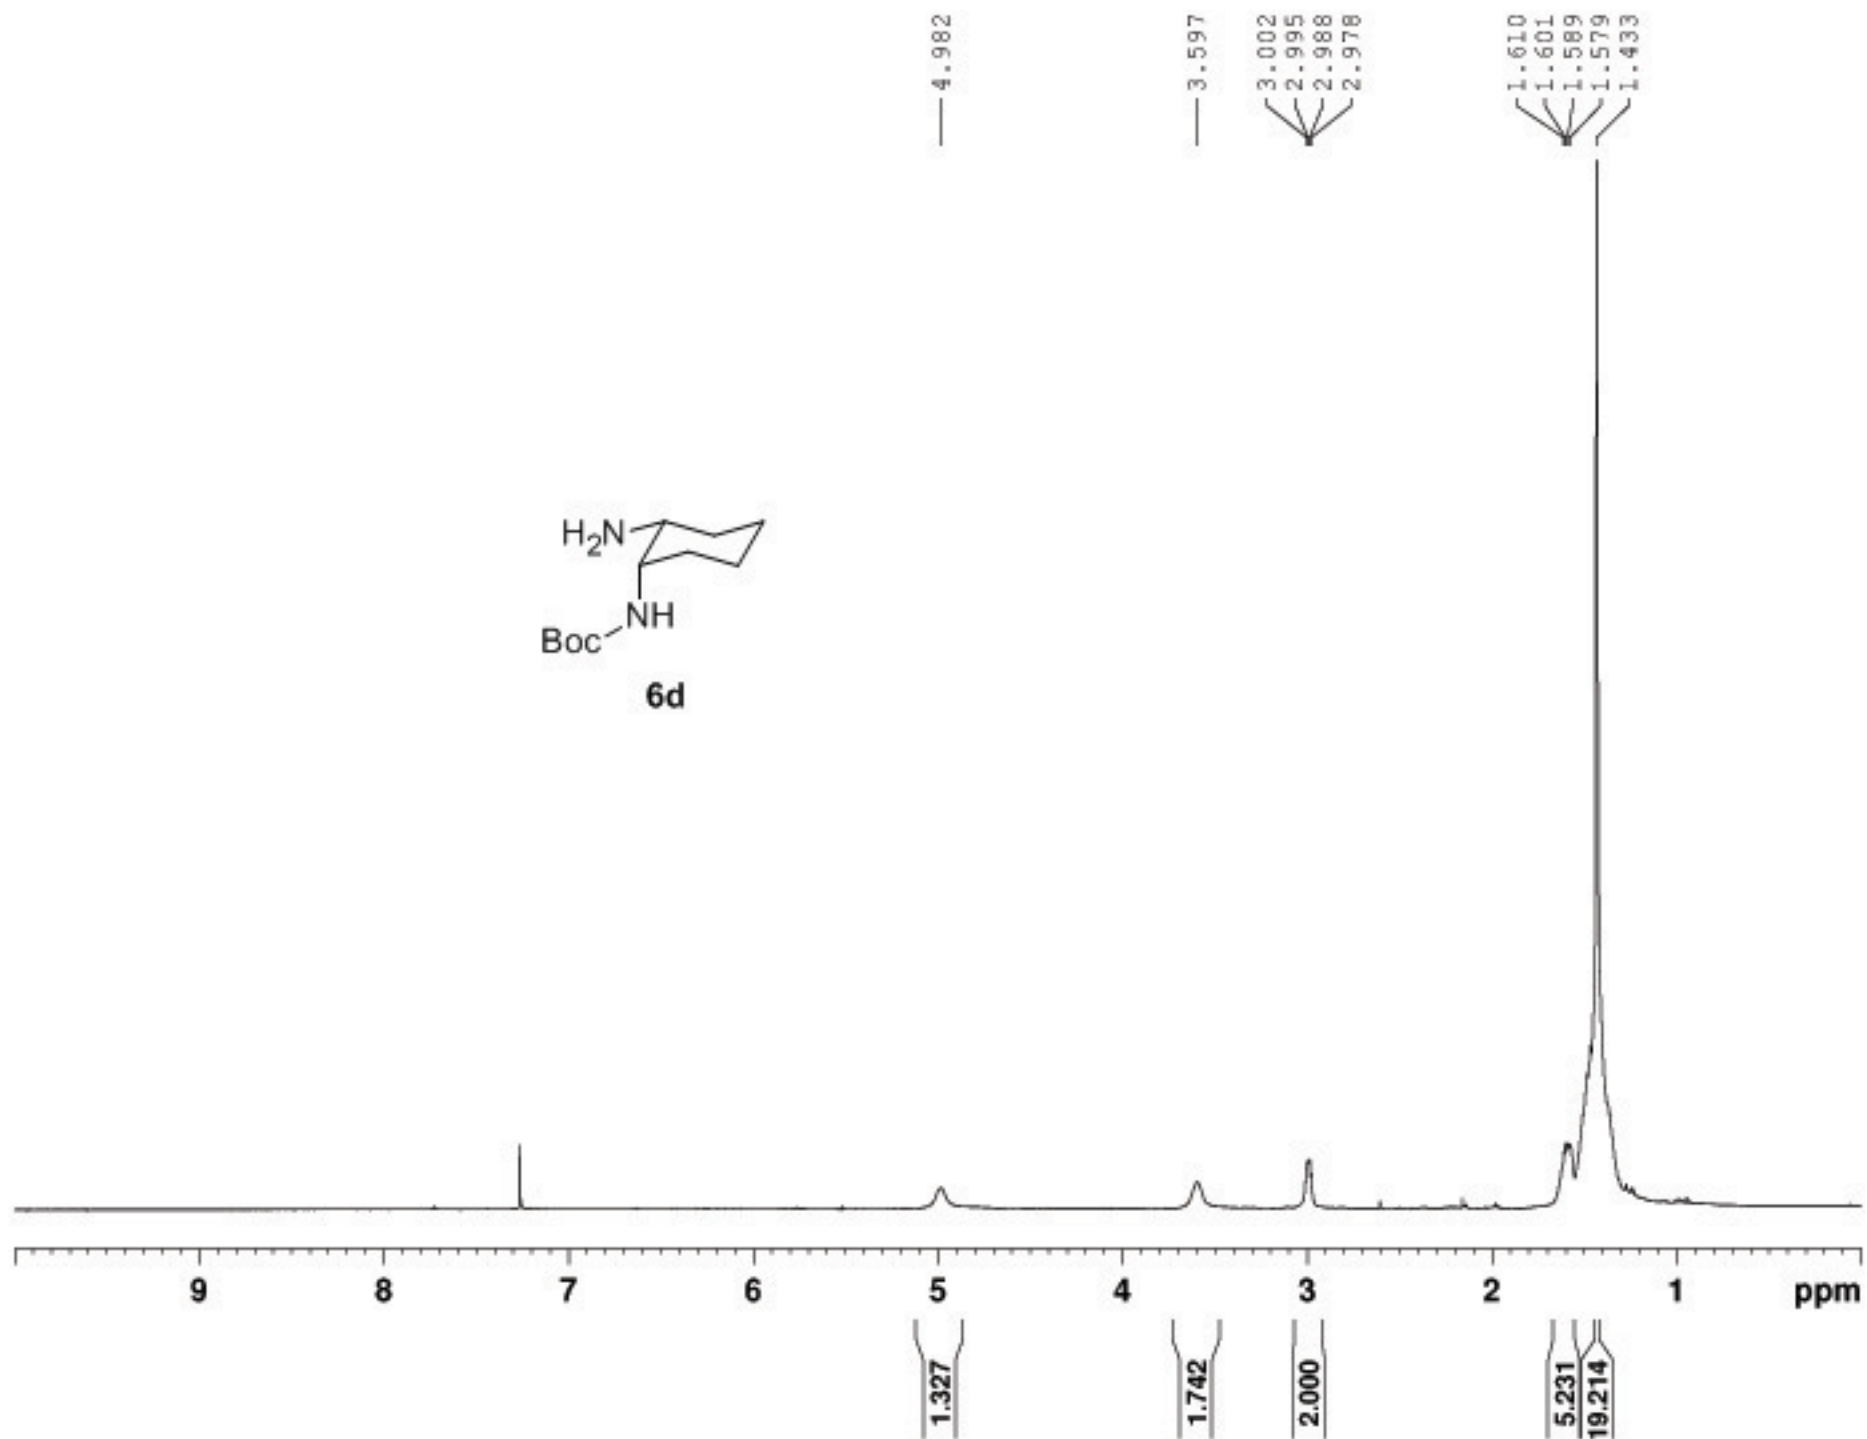

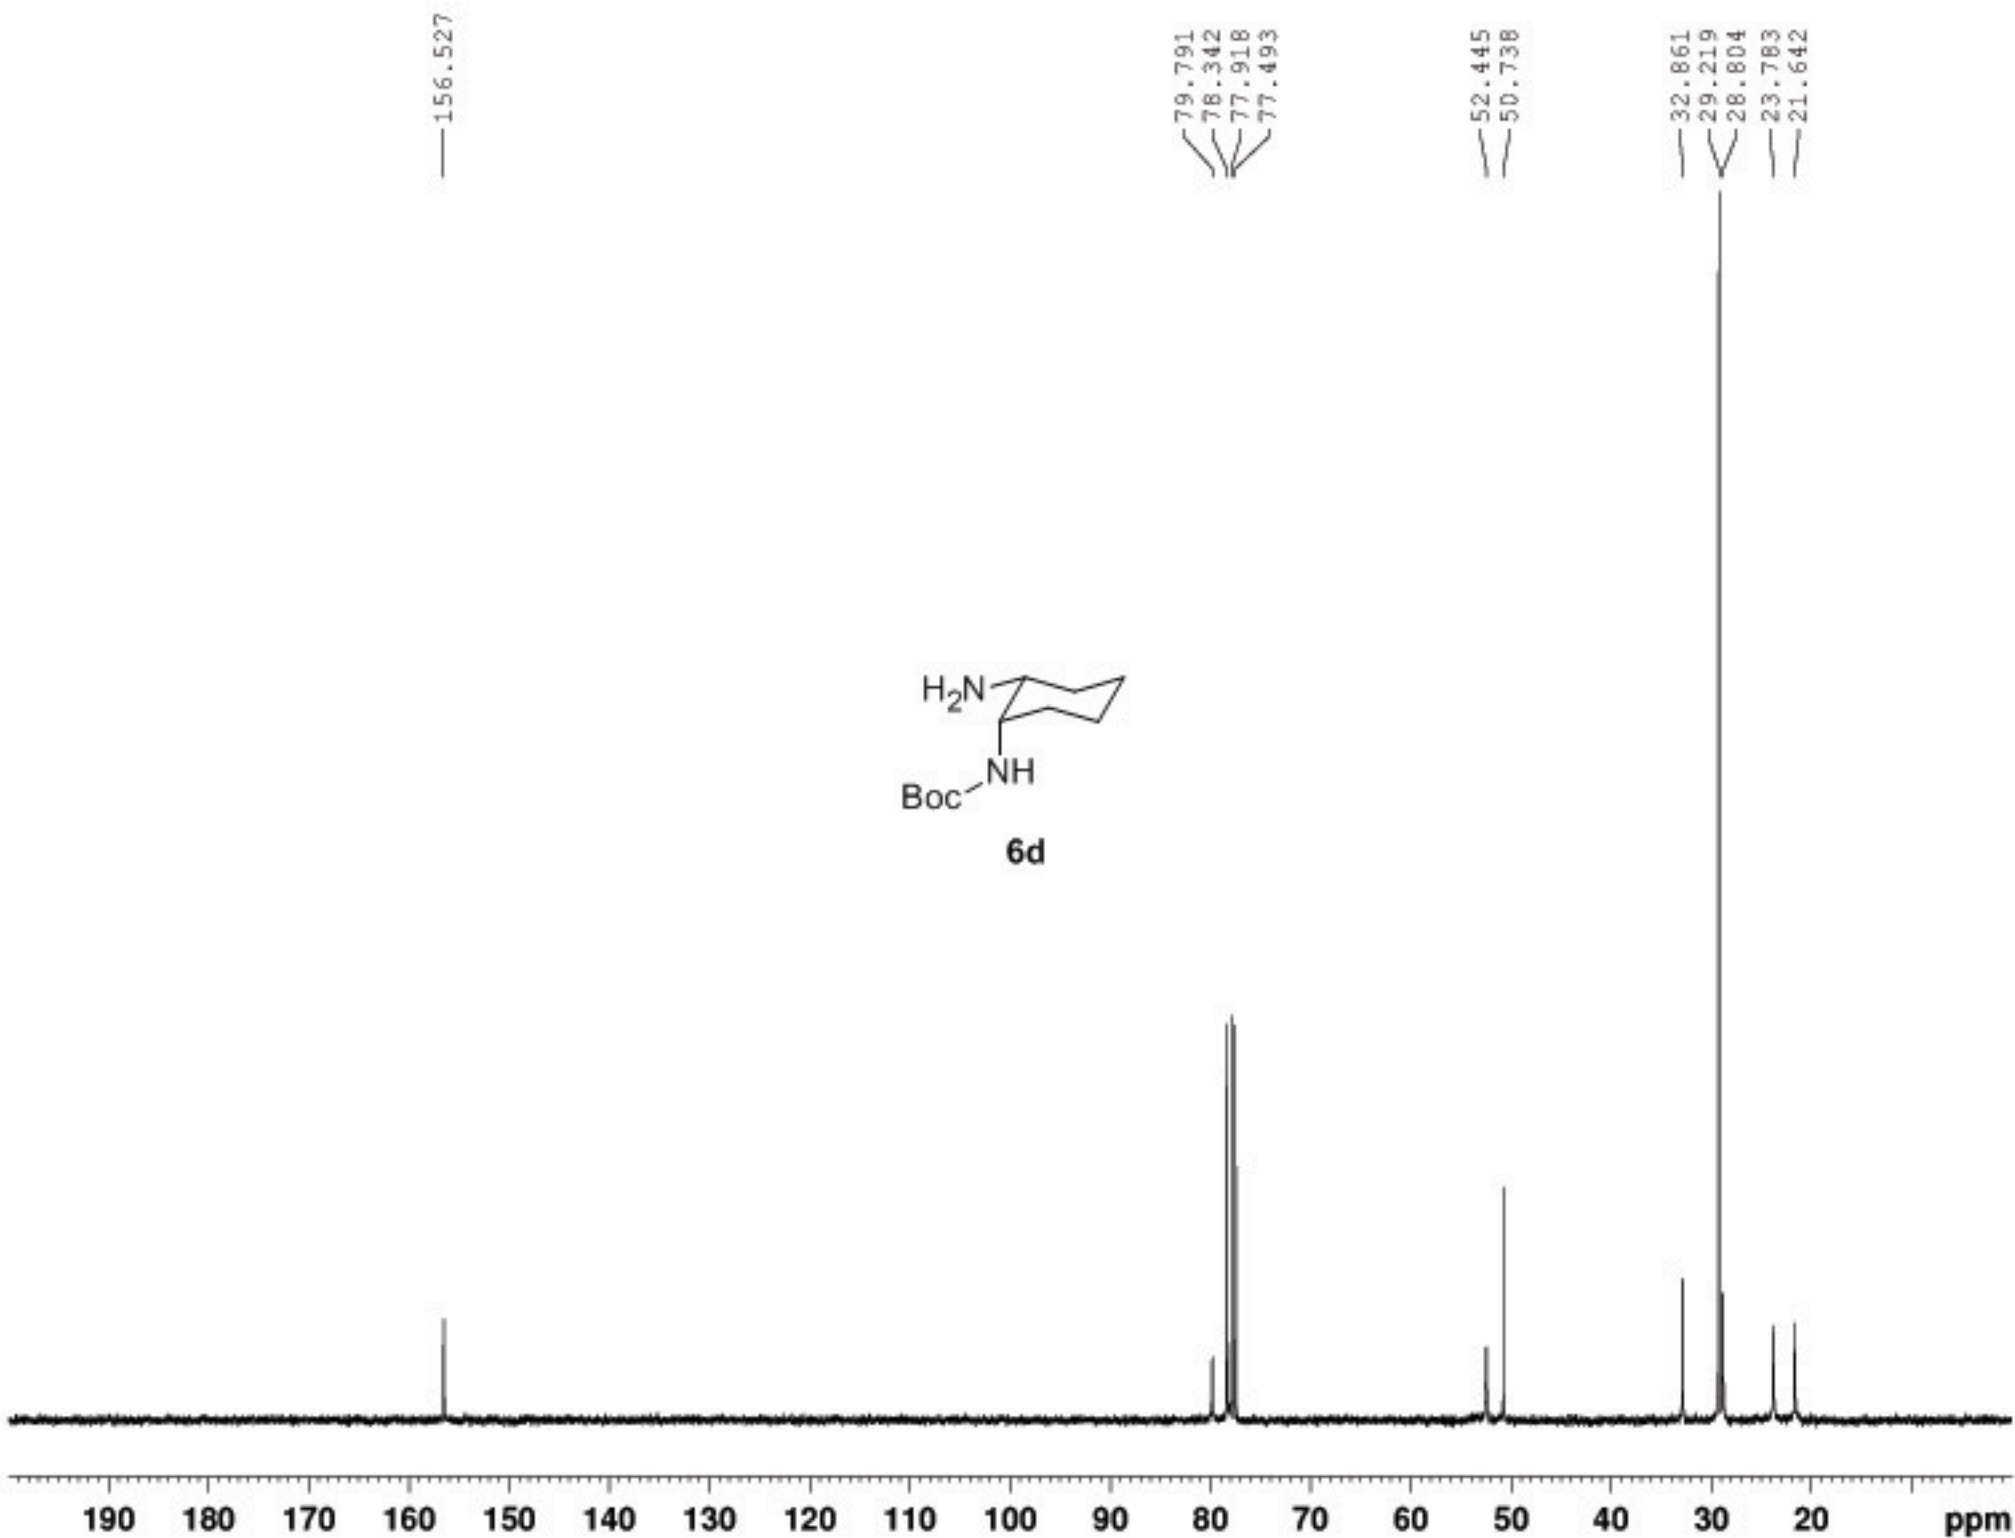

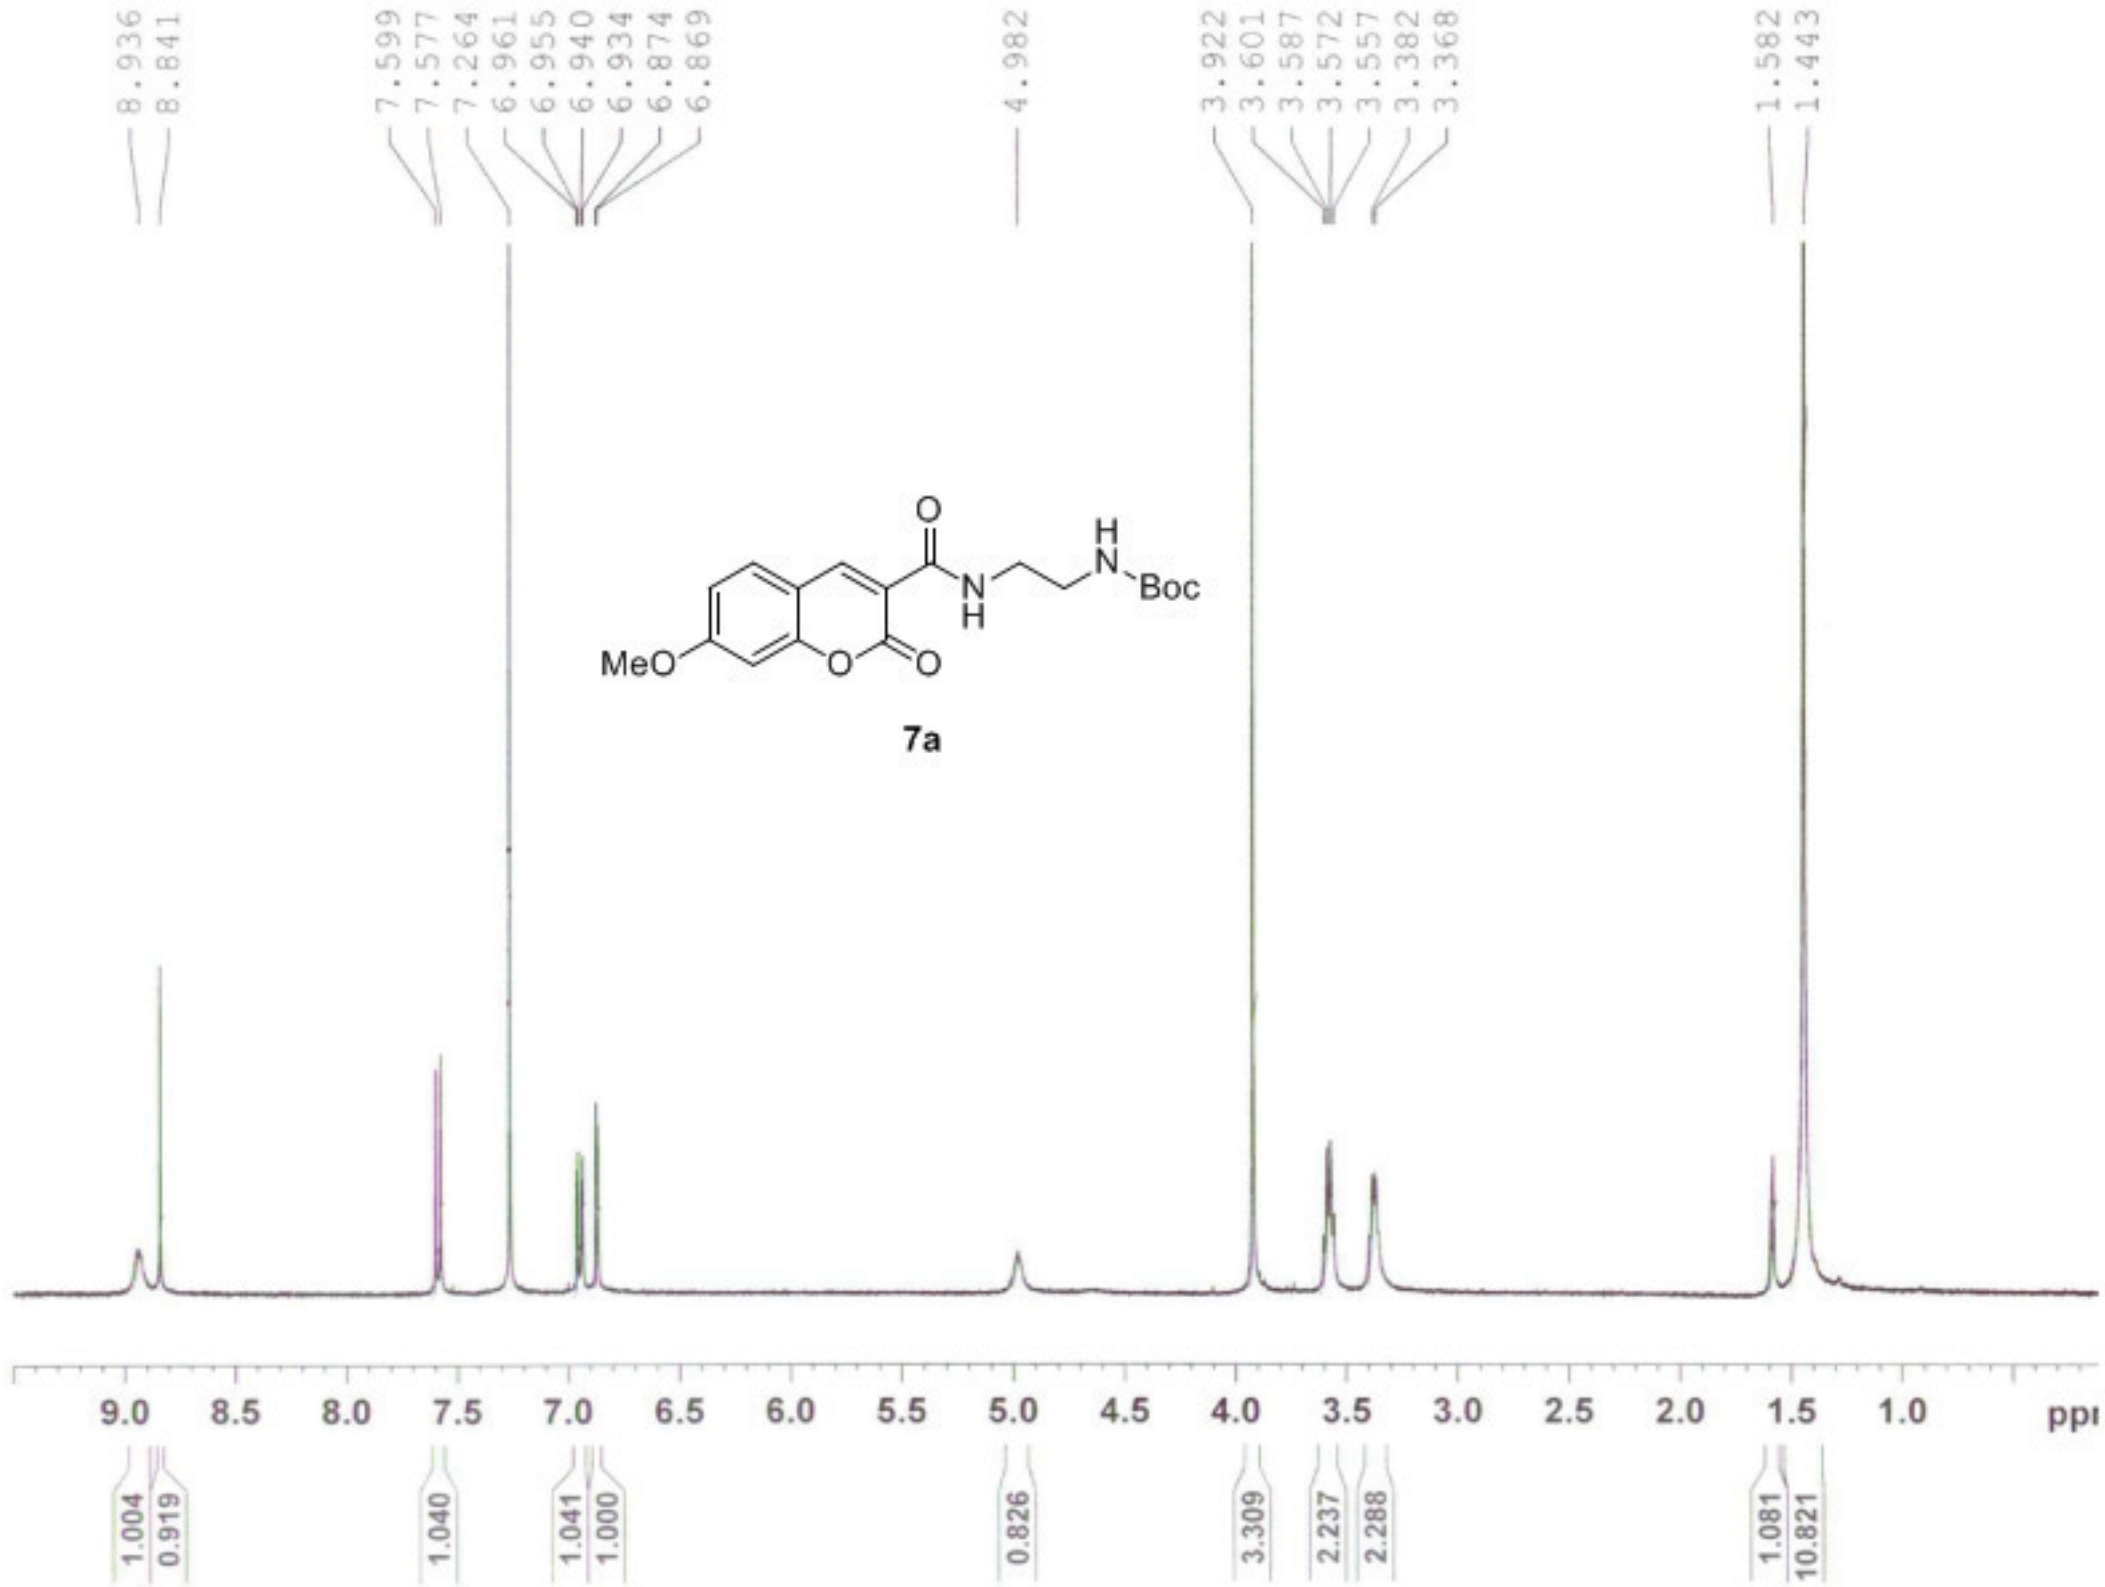

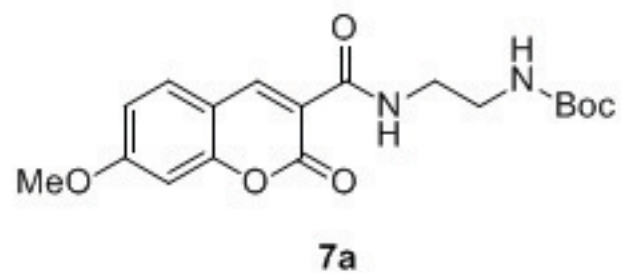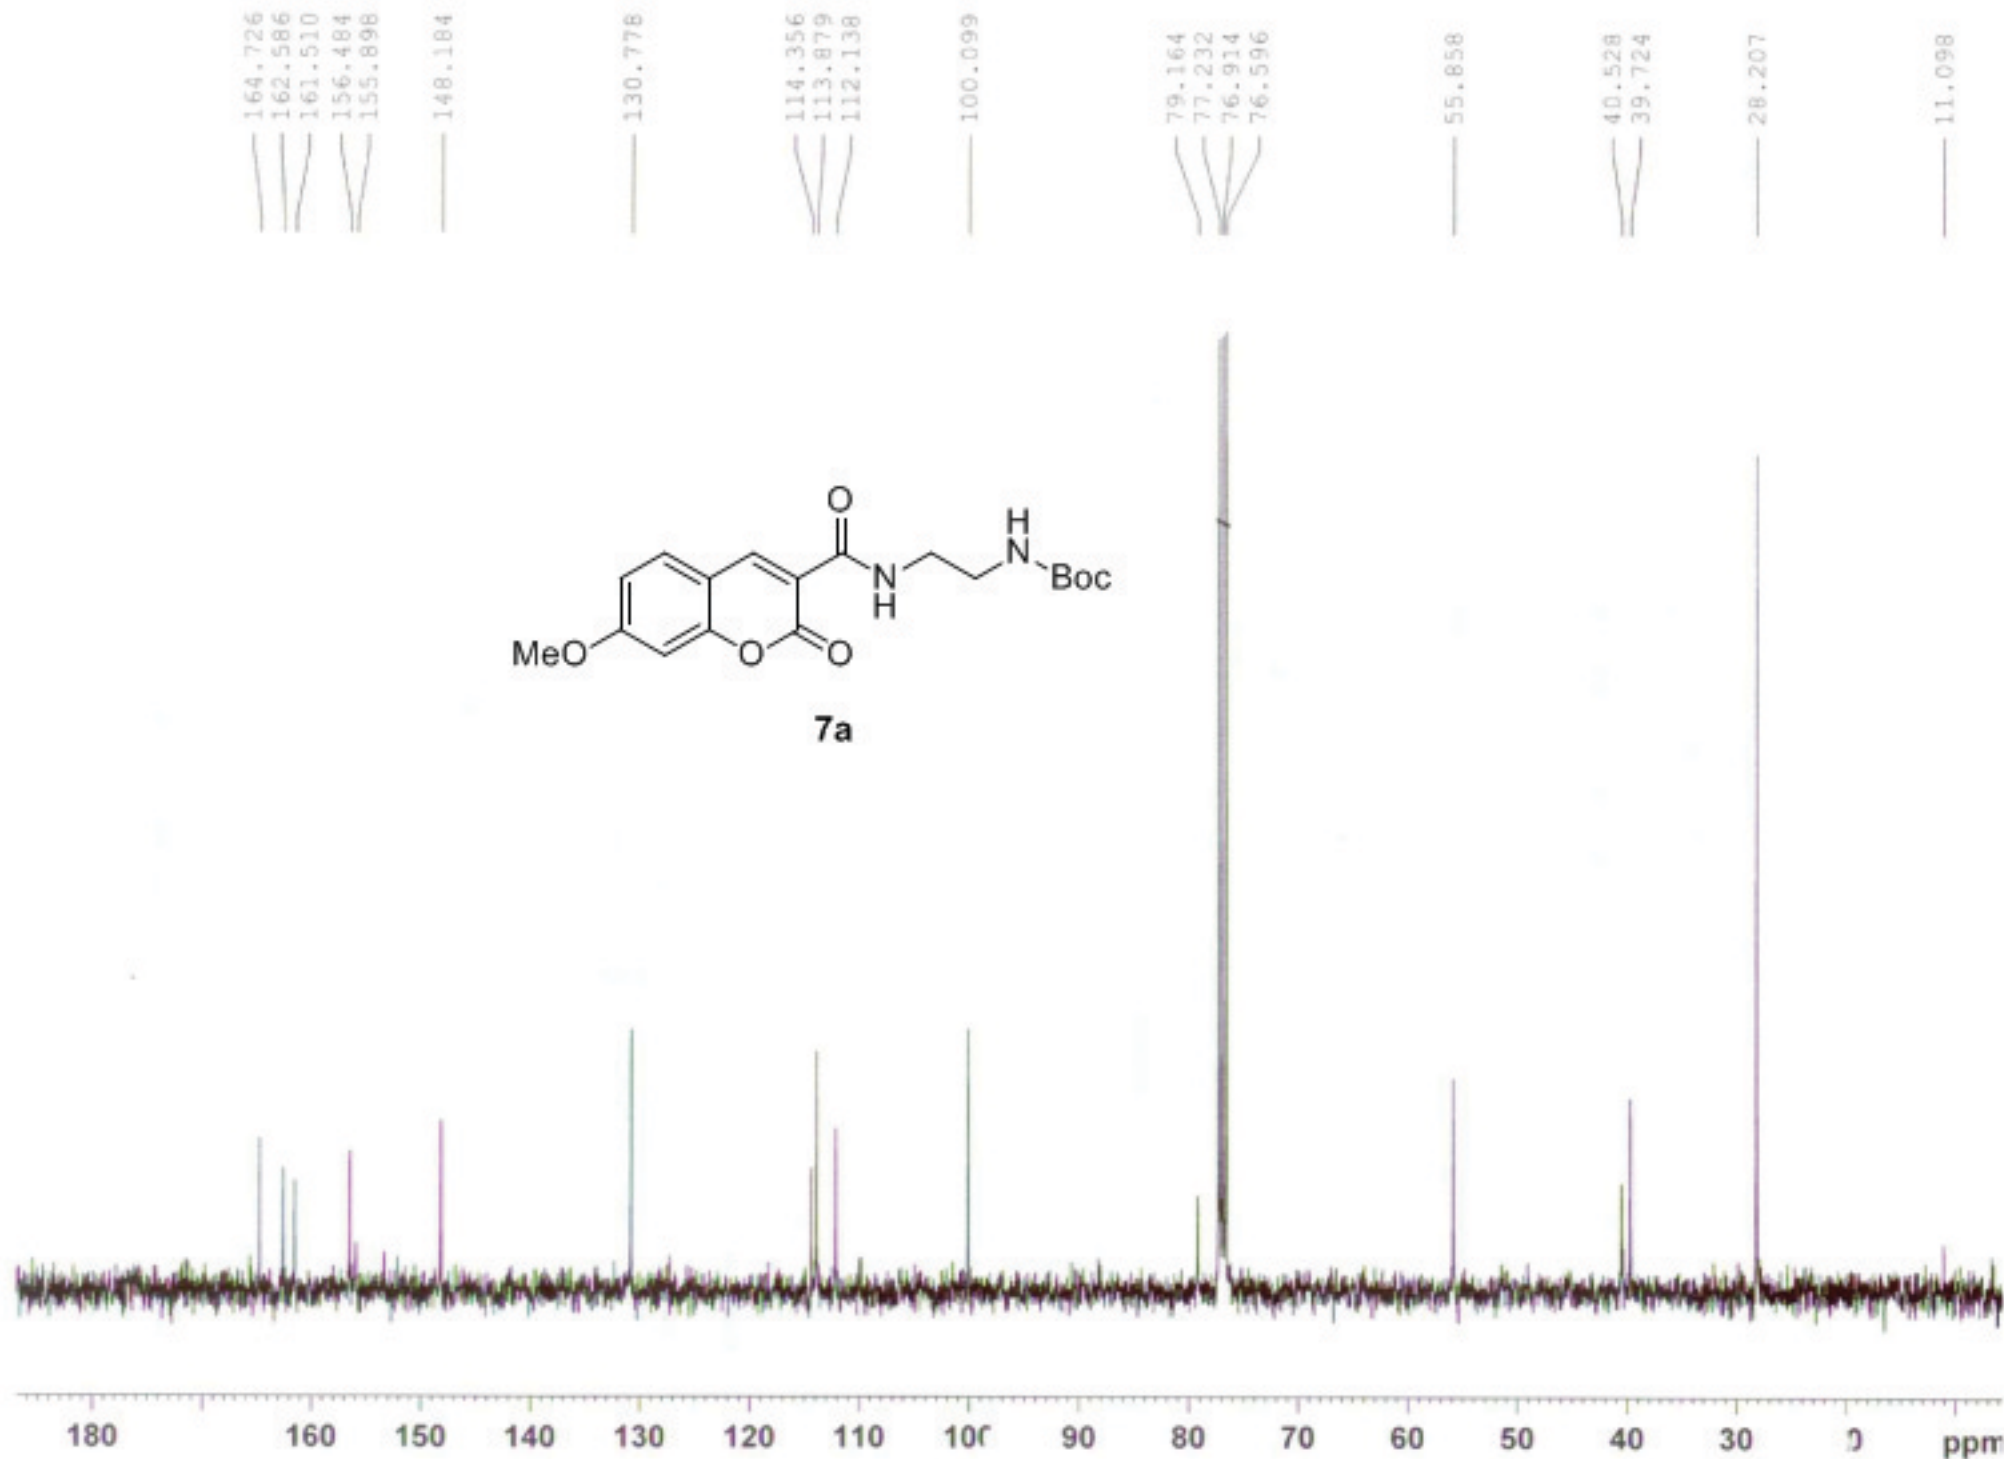

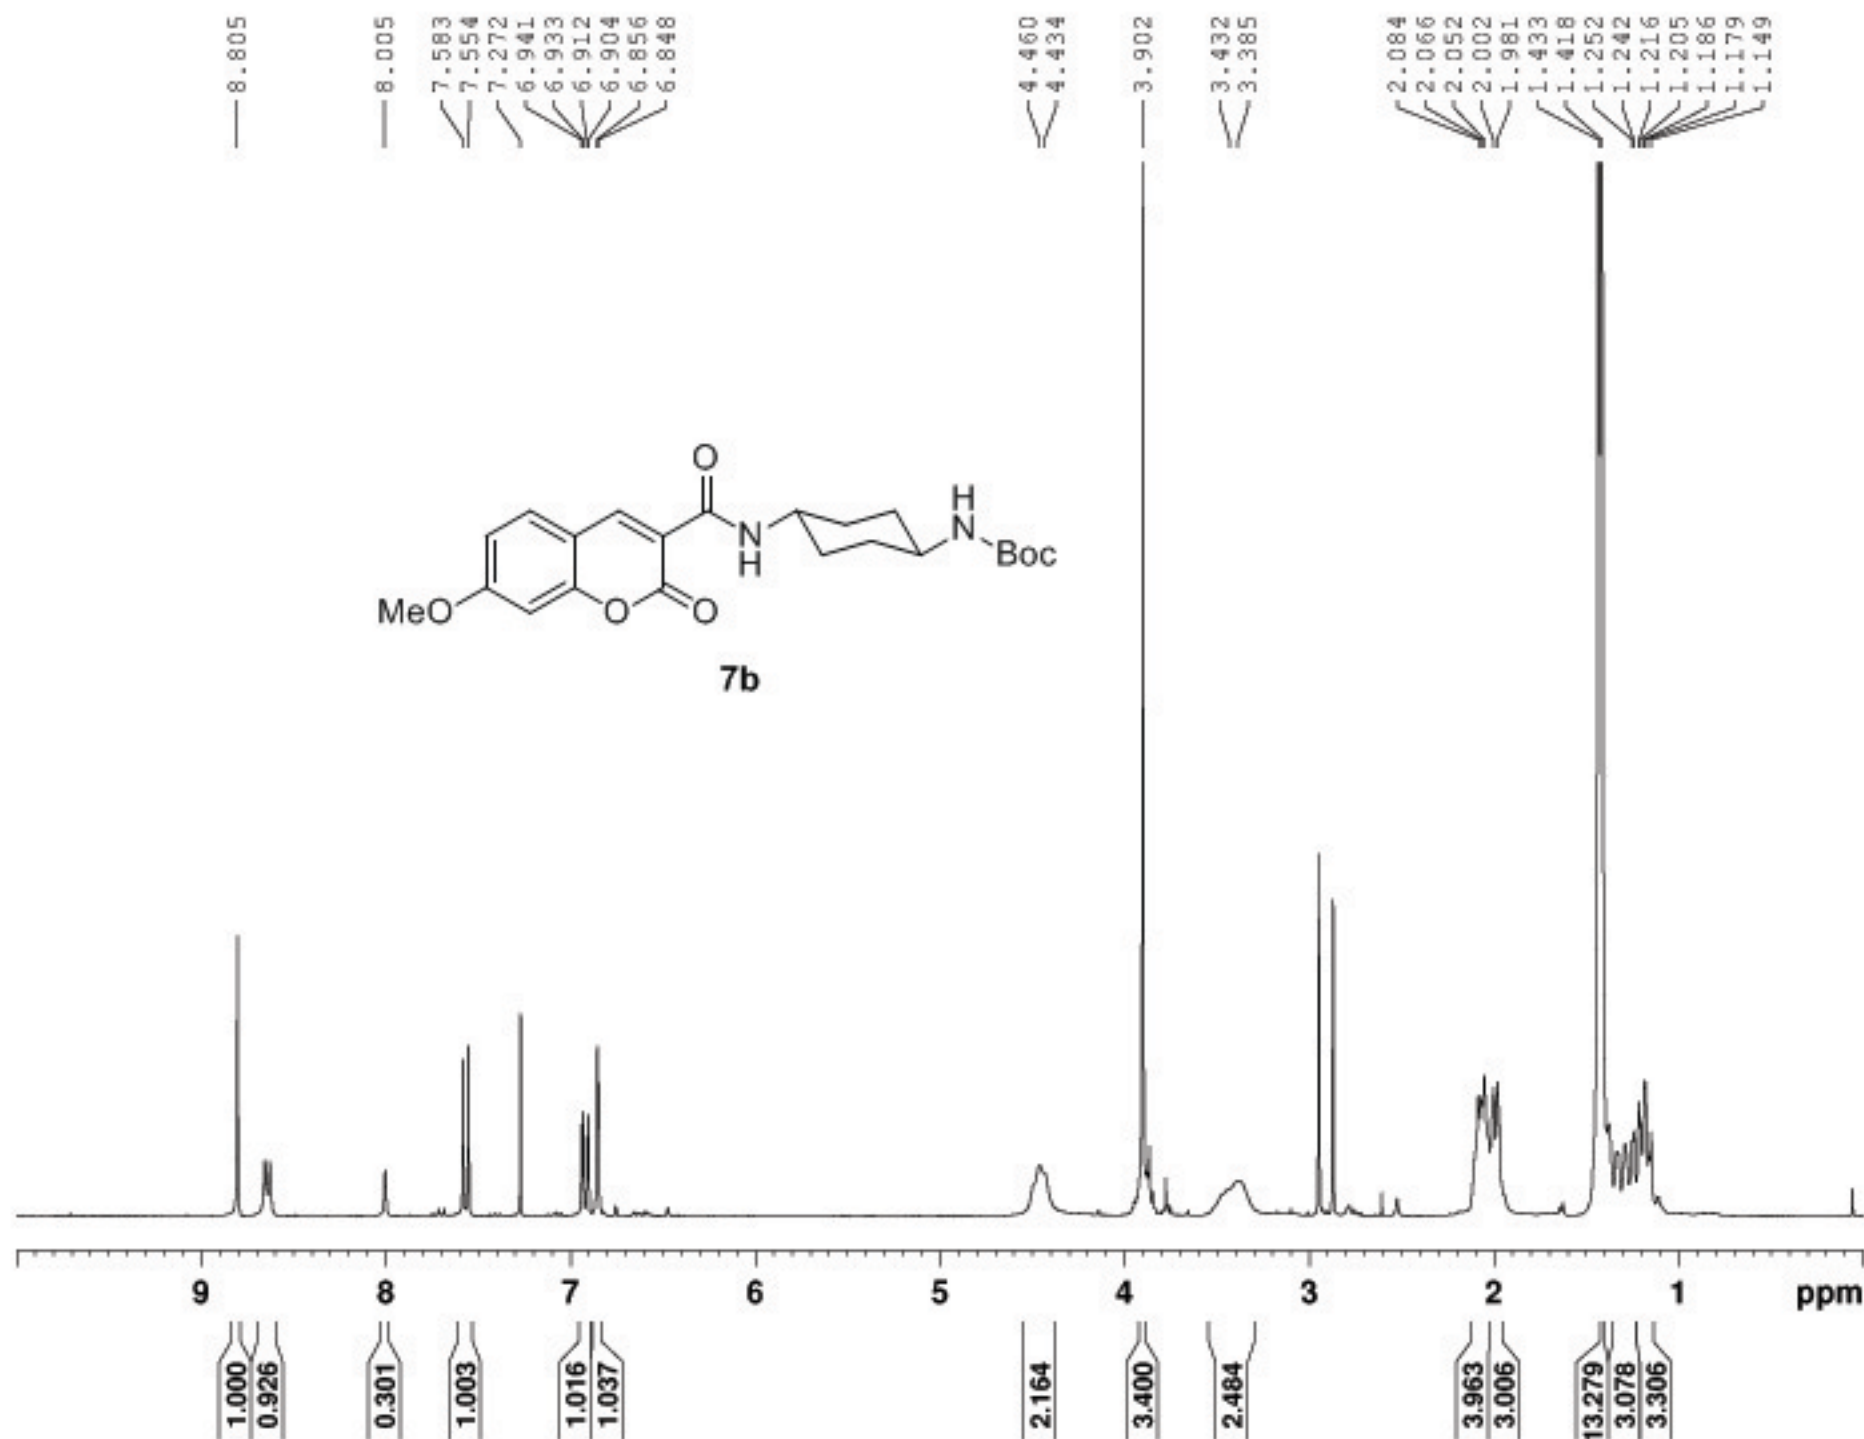



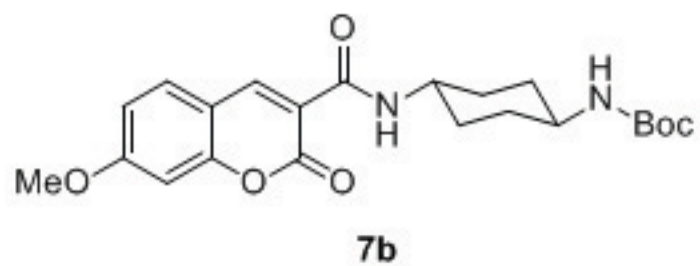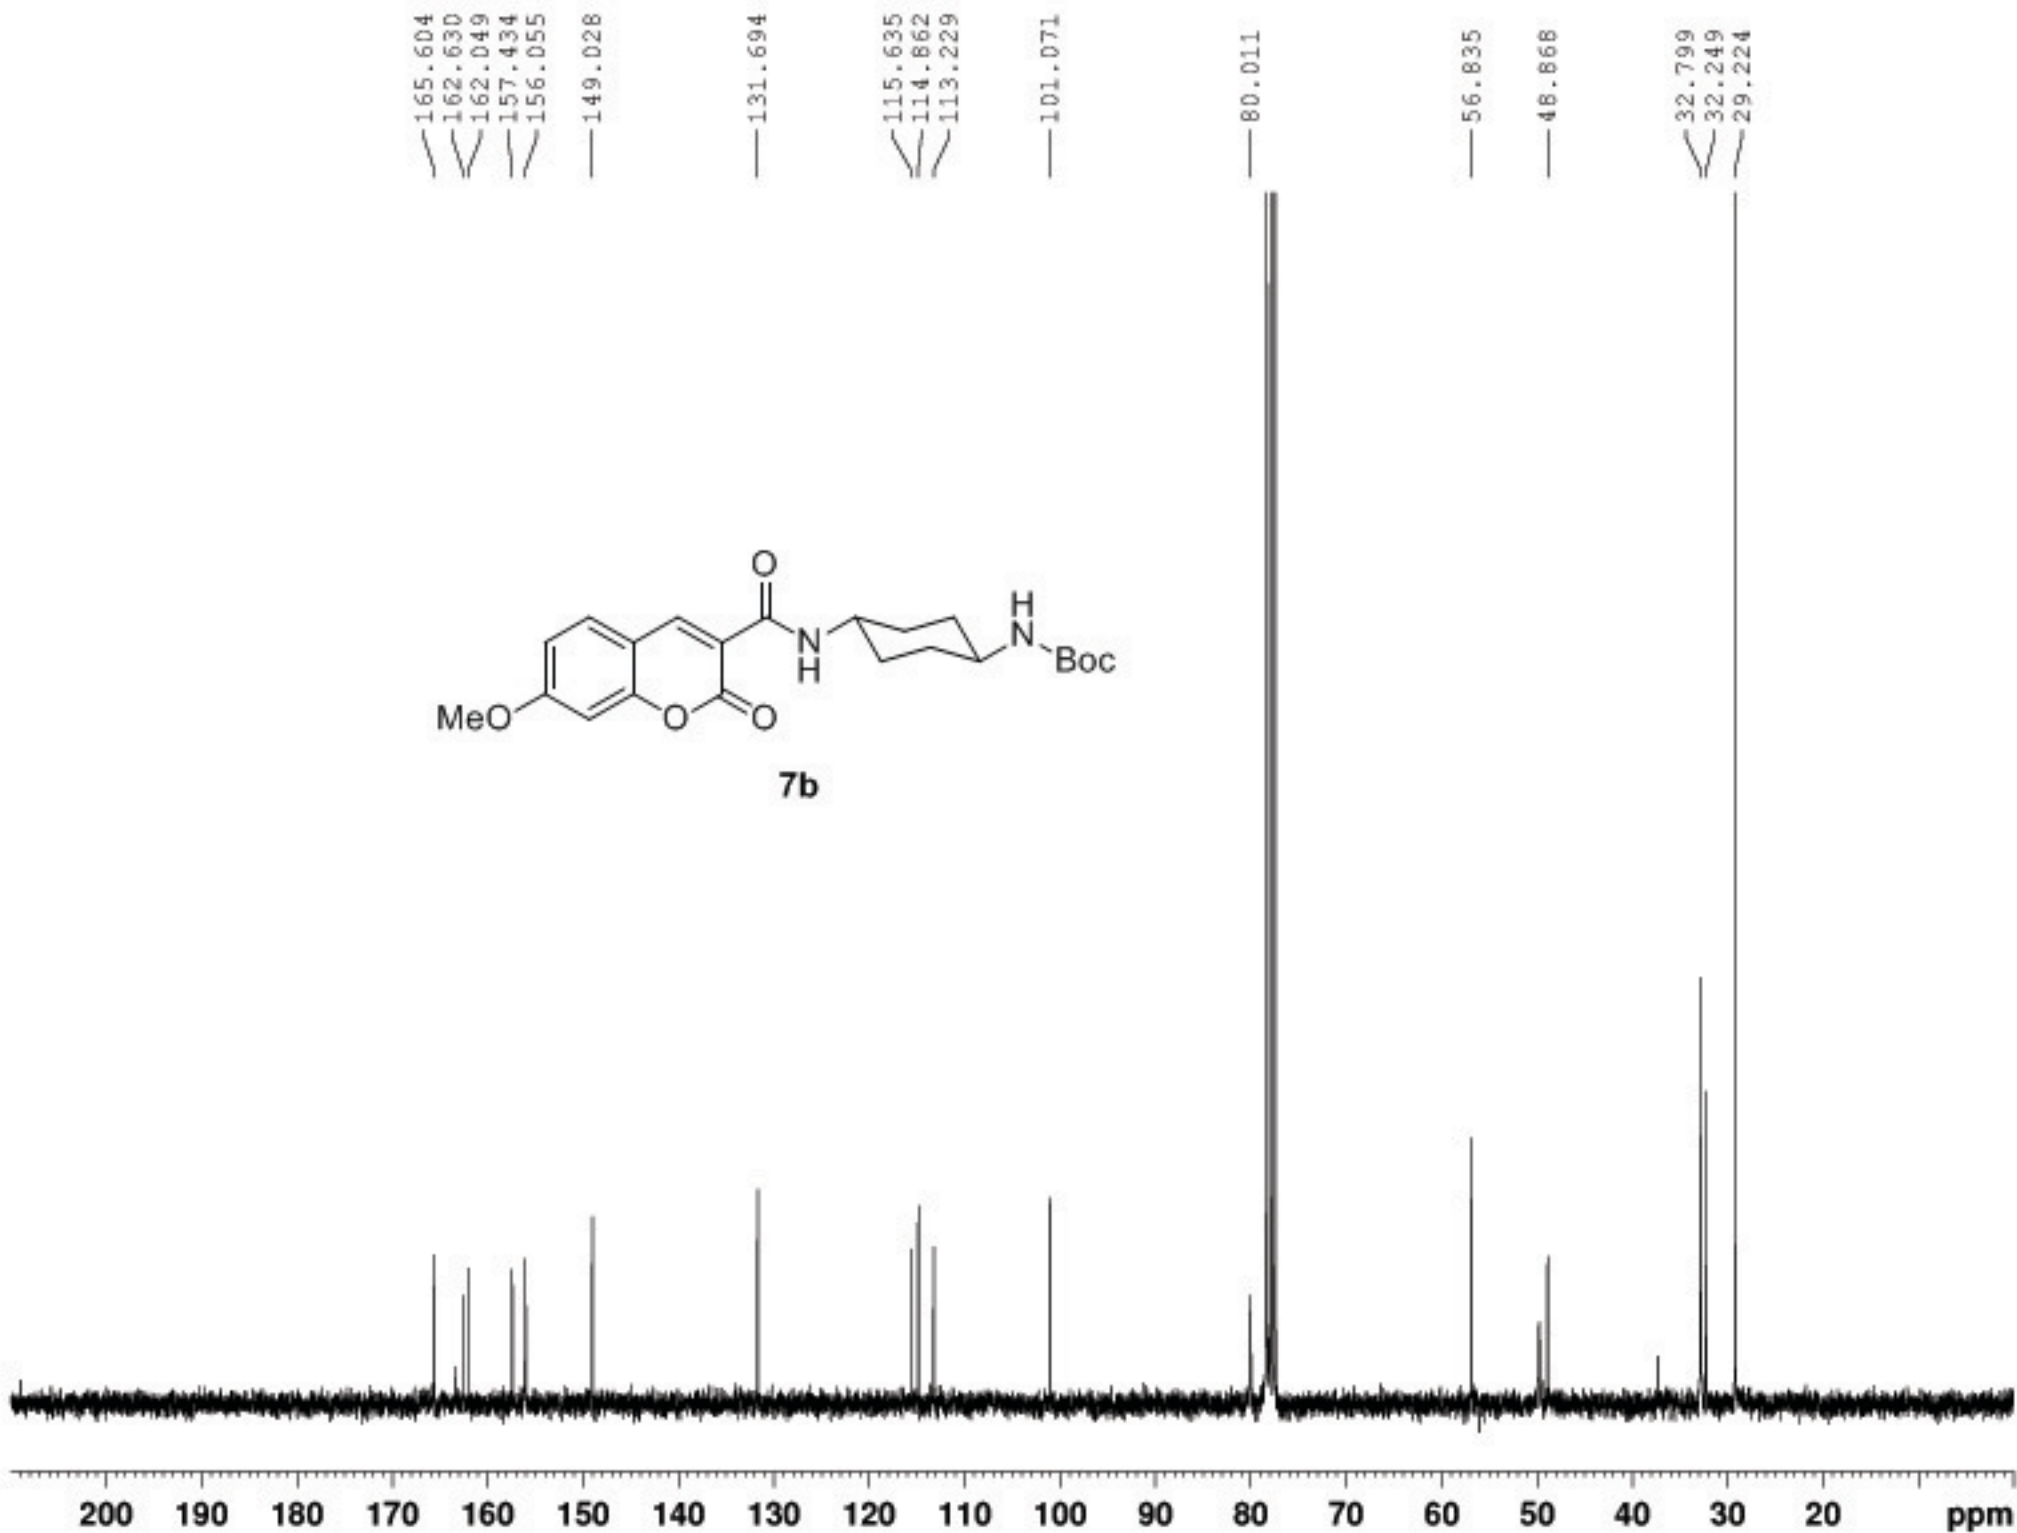

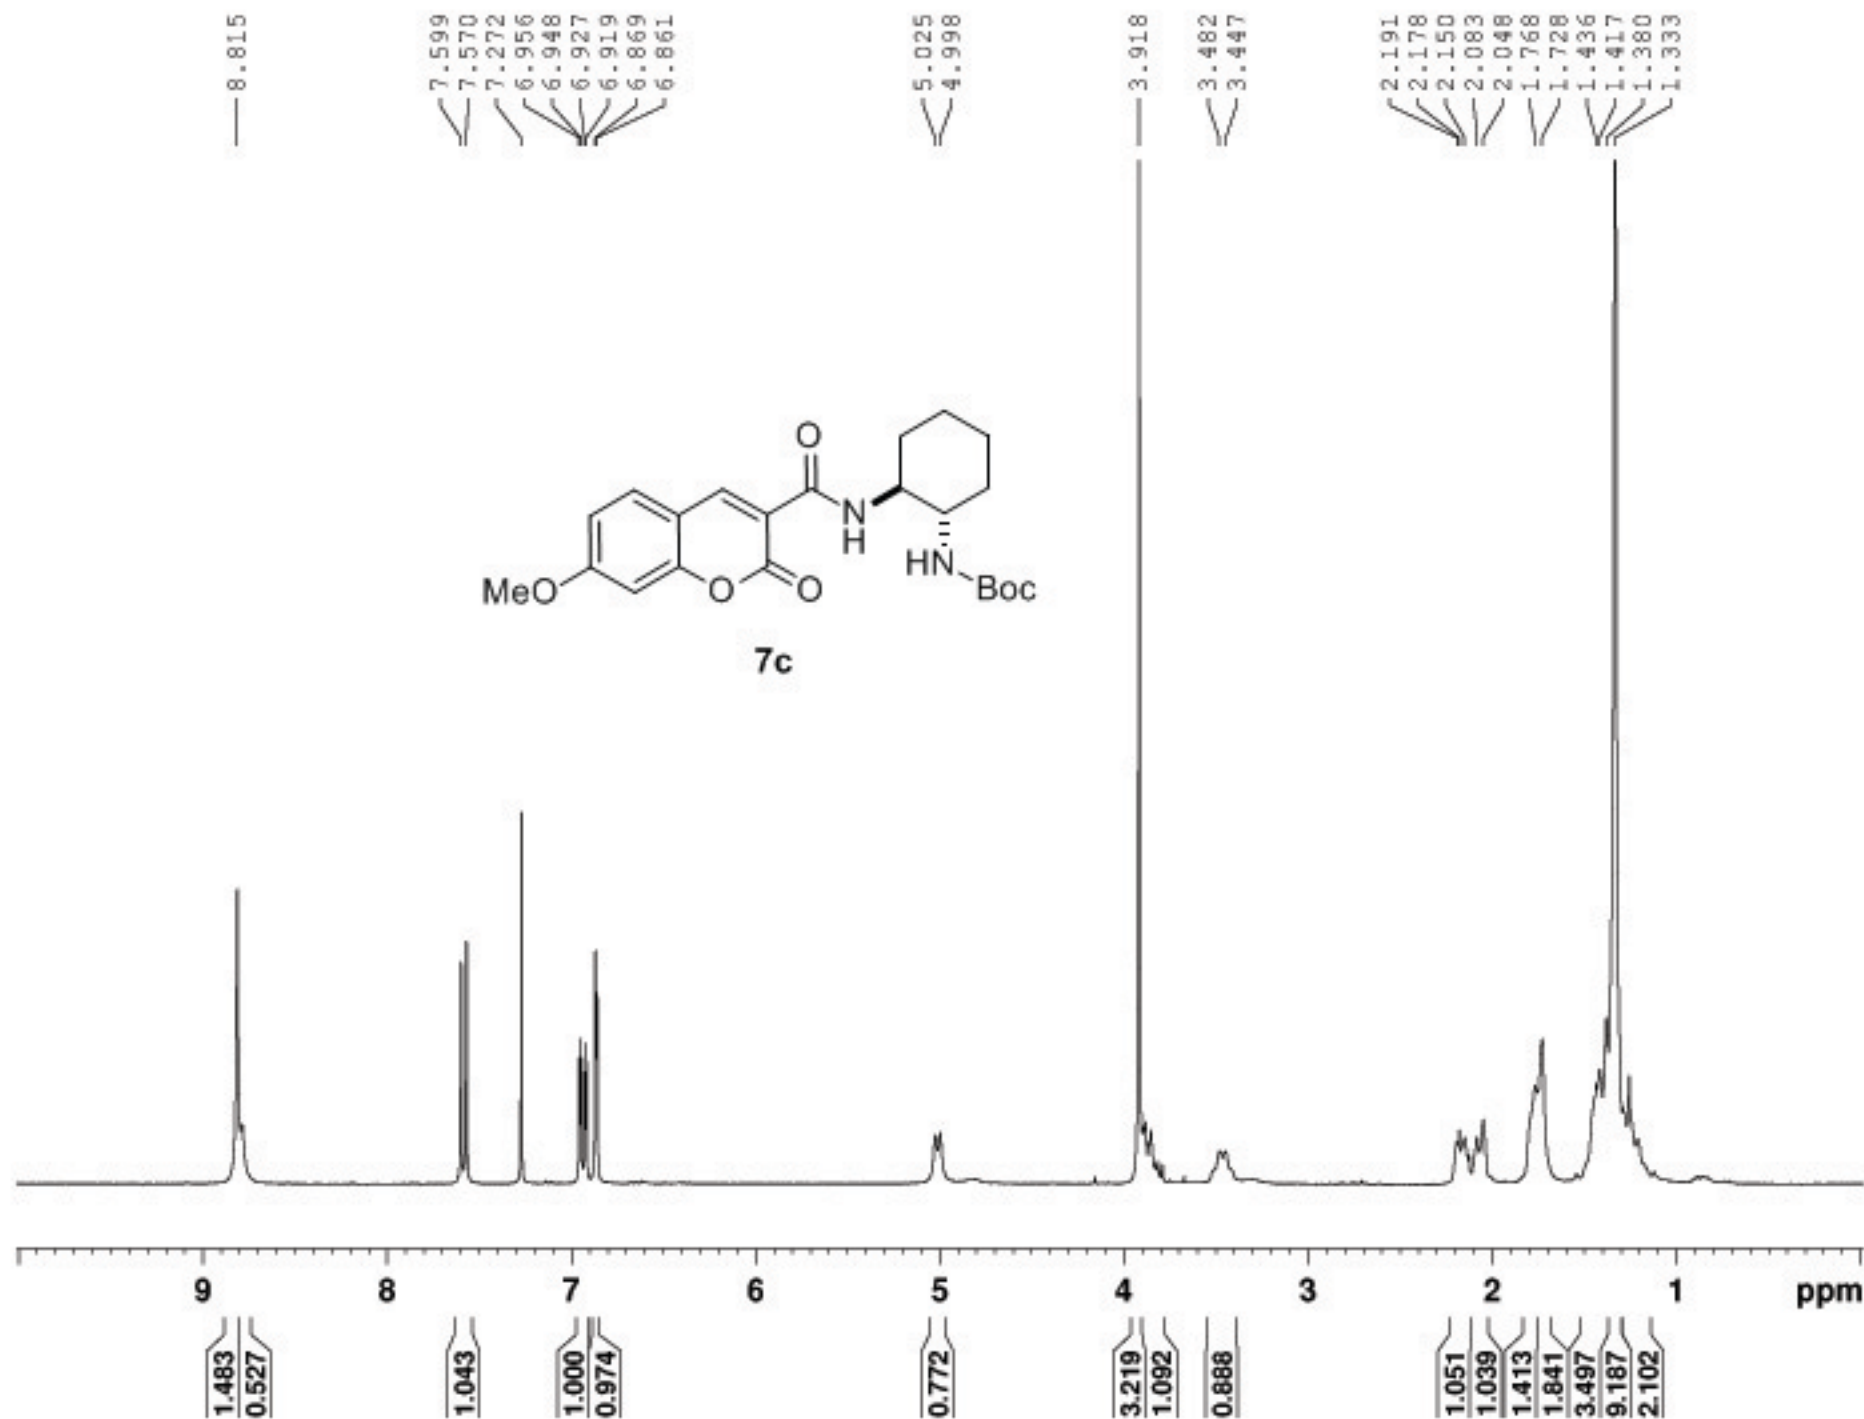

165.627  
163.338  
162.154  
157.498  
156.594

148.955

131.681

115.511  
114.817  
113.150

101.072

79.748  
78.313  
78.089  
77.888  
77.465

56.835  
56.056  
53.991

33.738  
33.222  
29.135  
25.680  
25.474

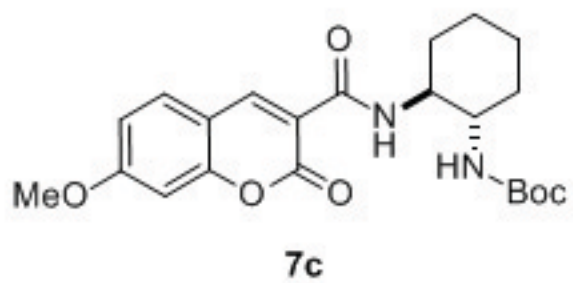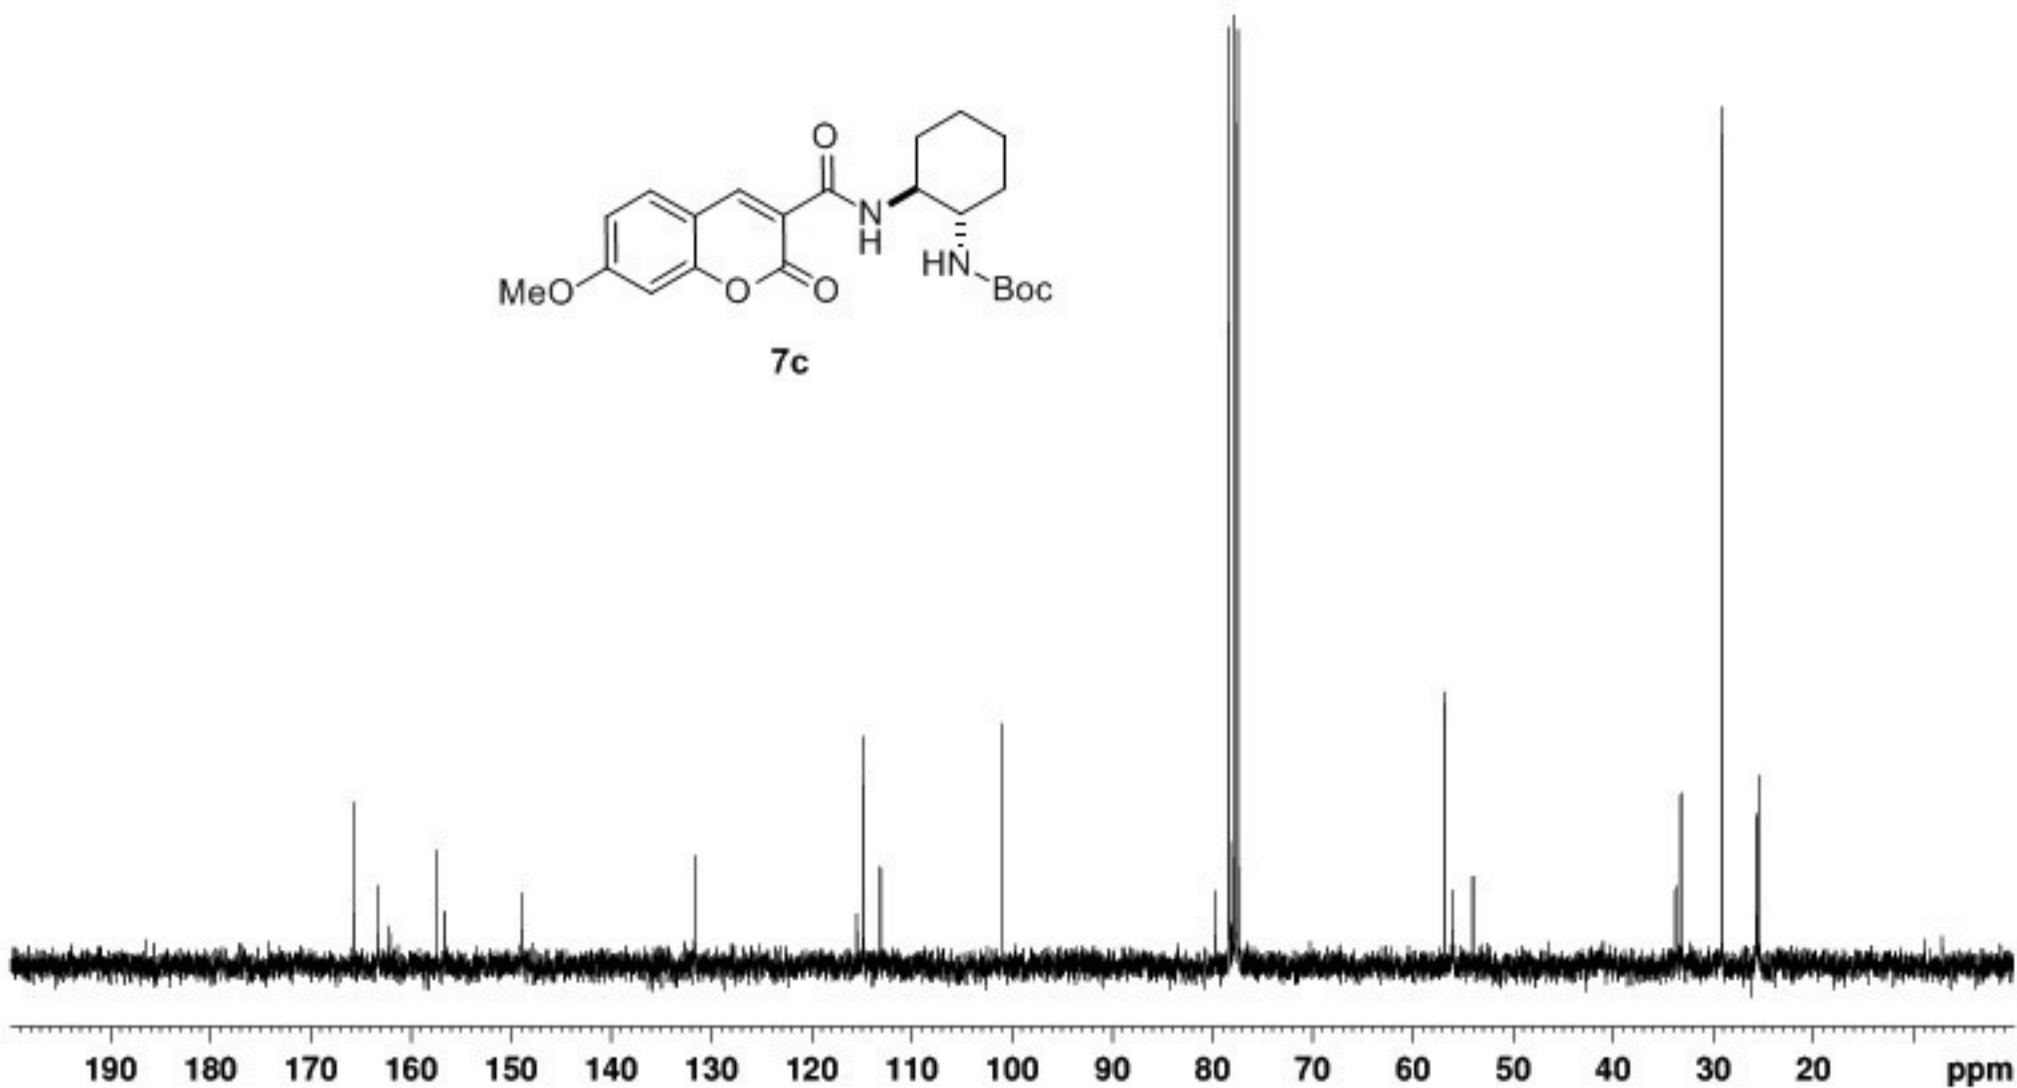

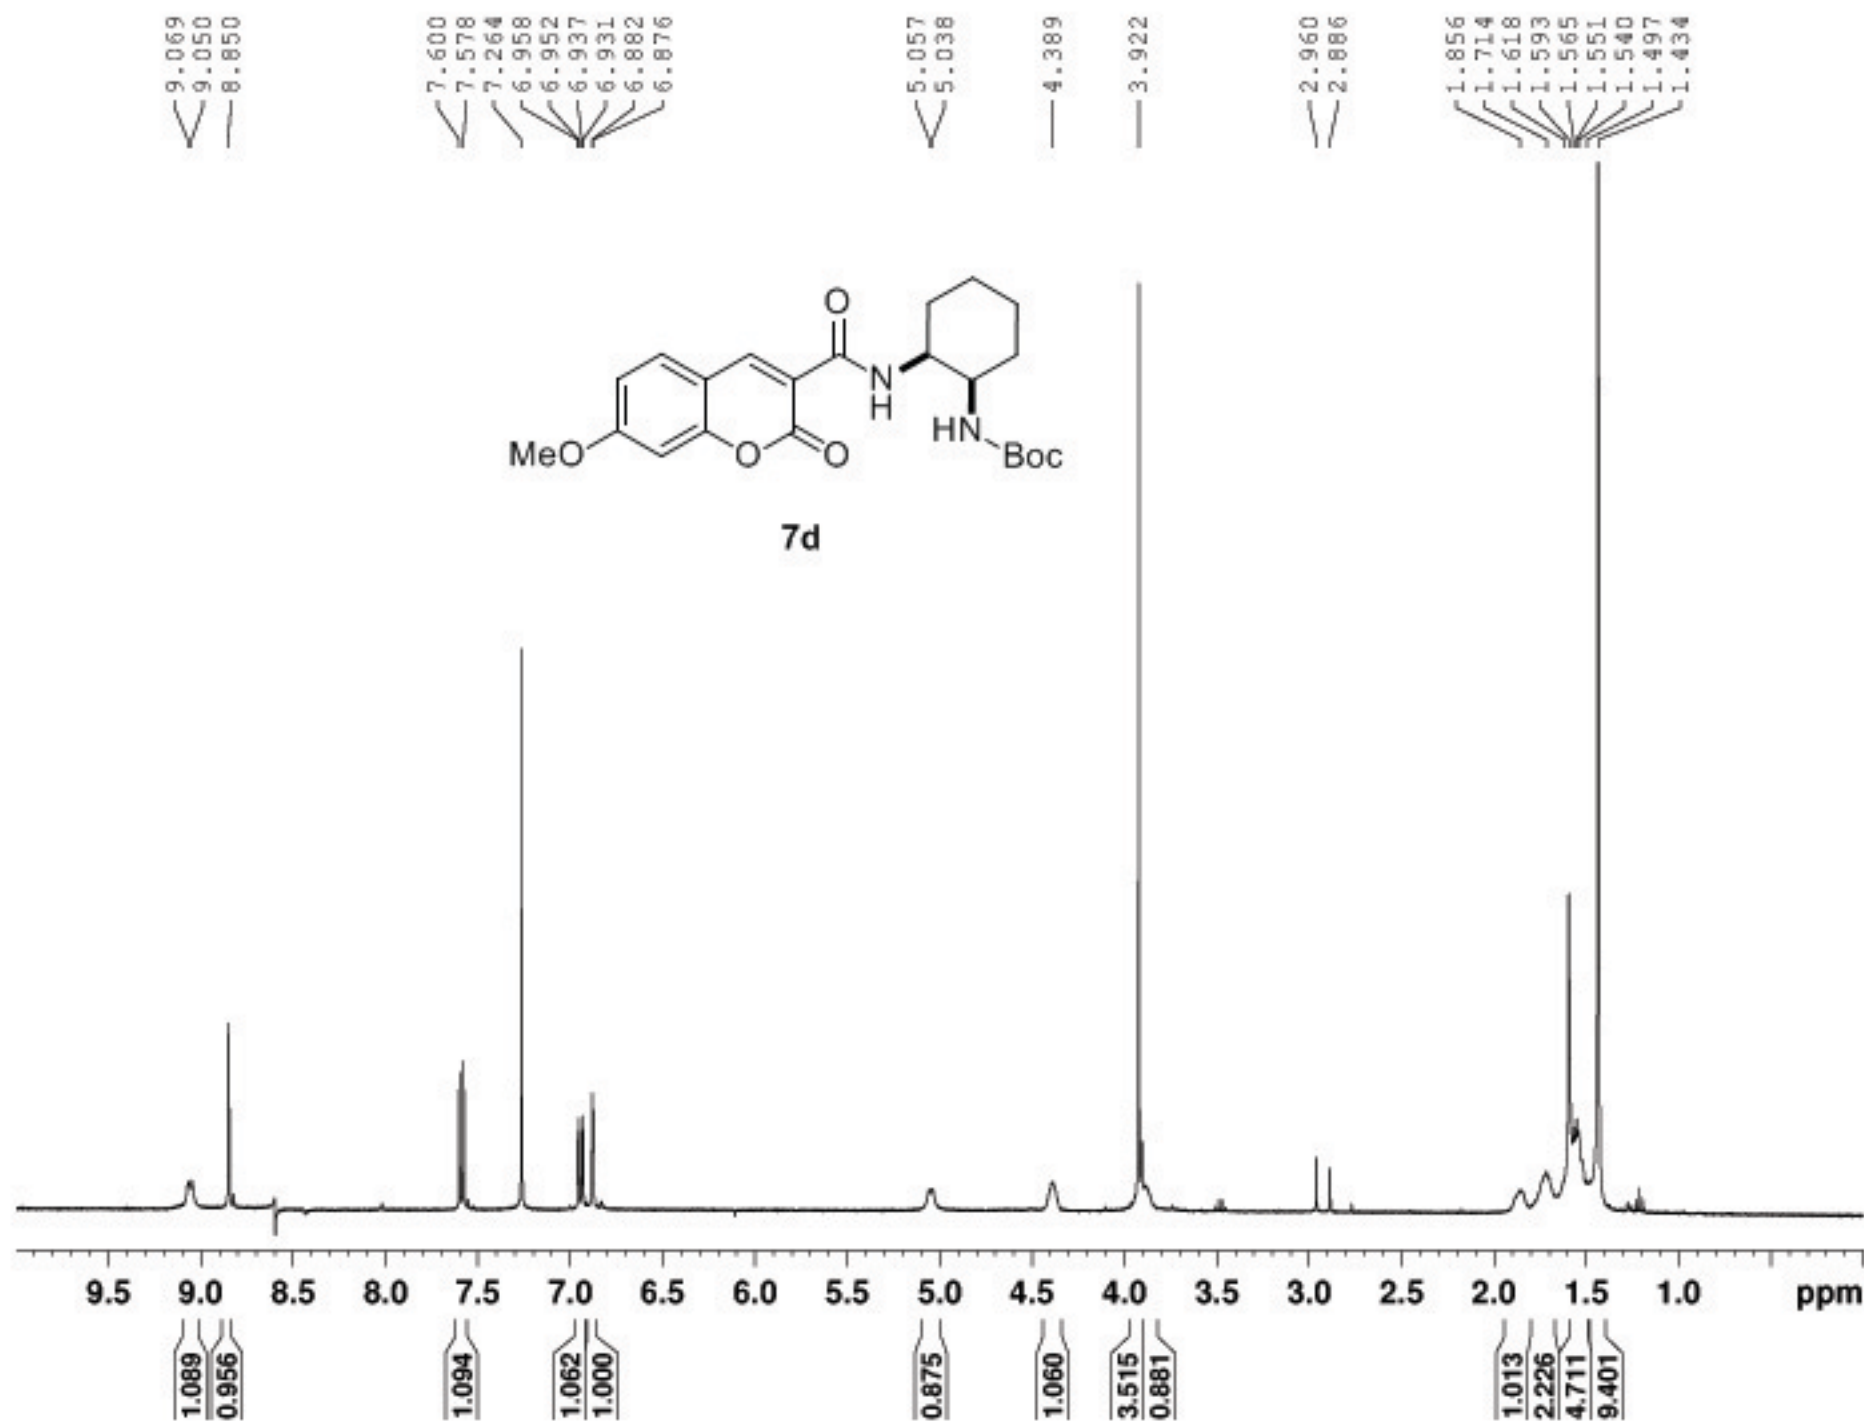

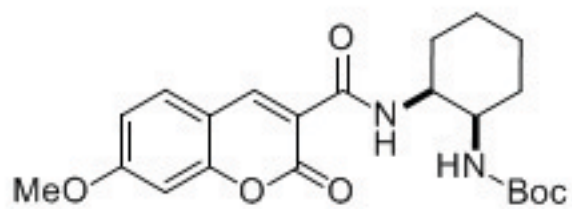

7d

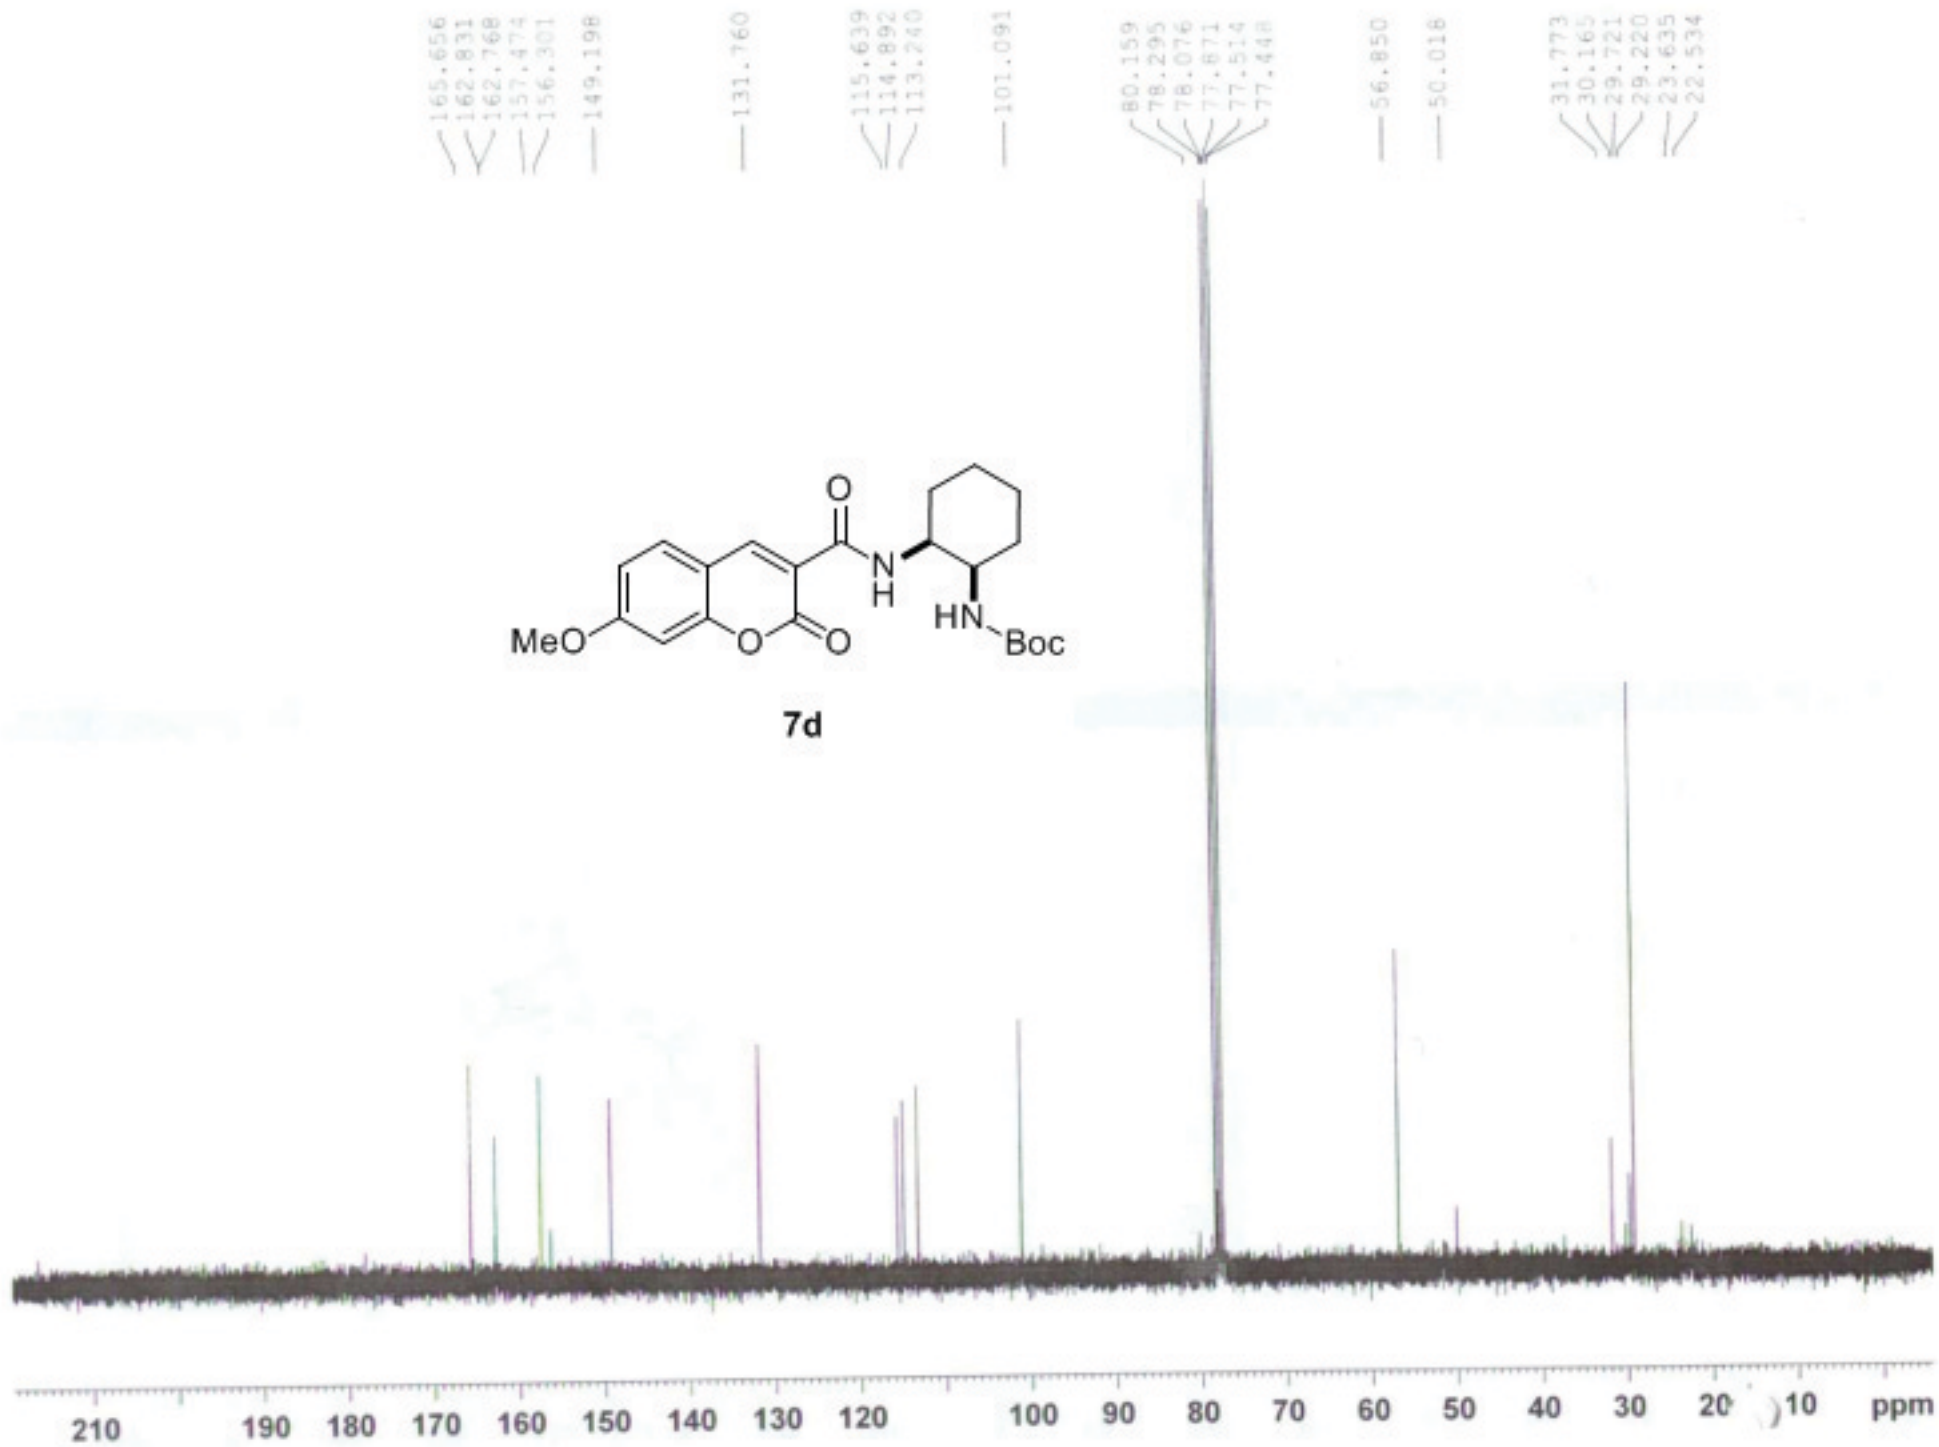

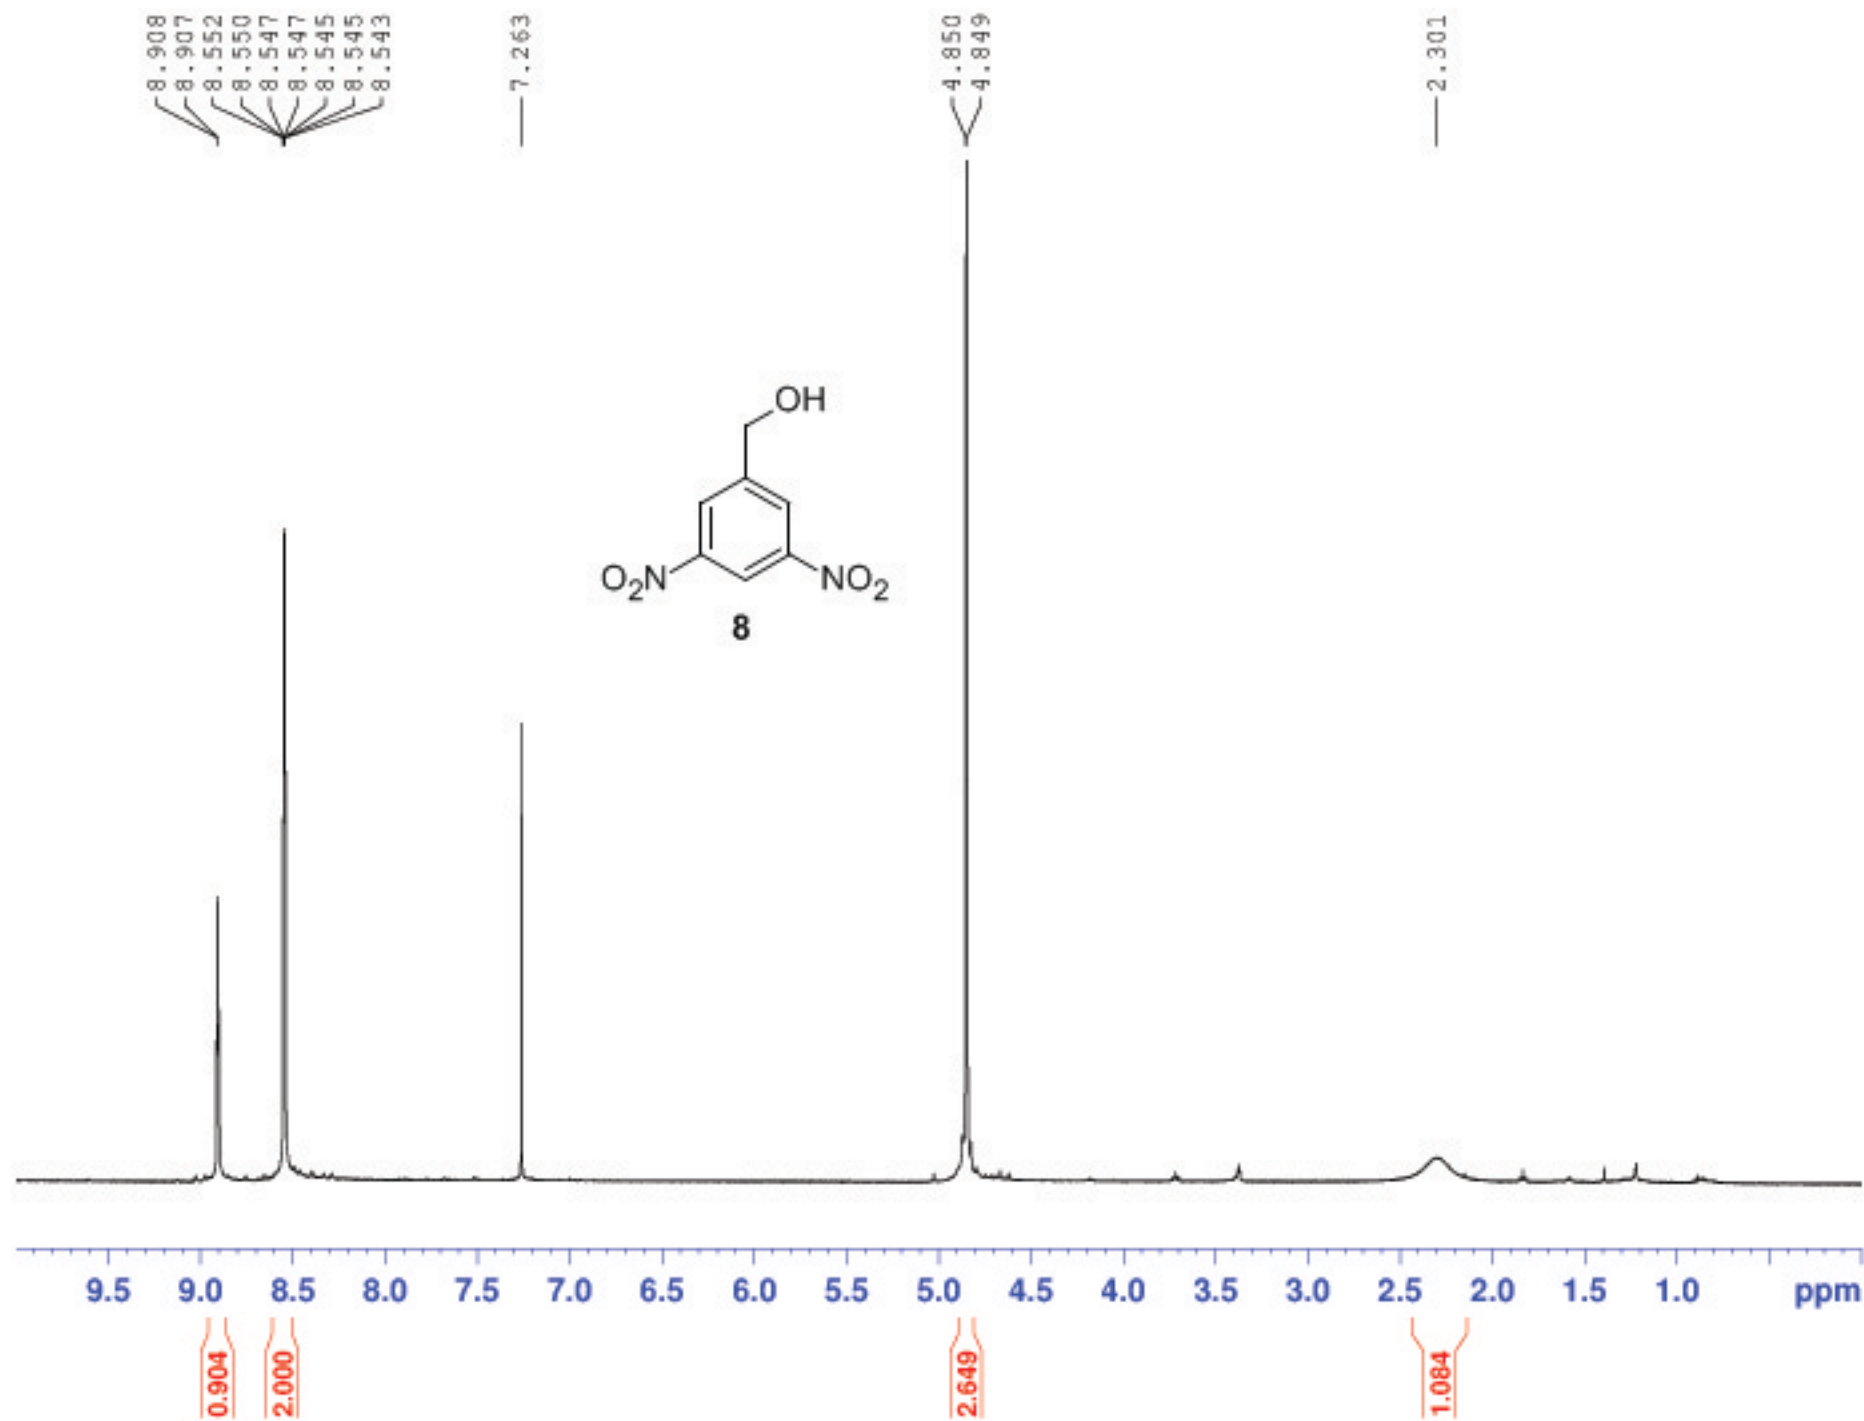



149.349  
148.367

126.966

117.596

62.770

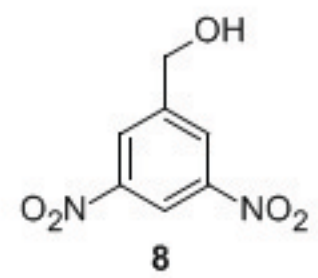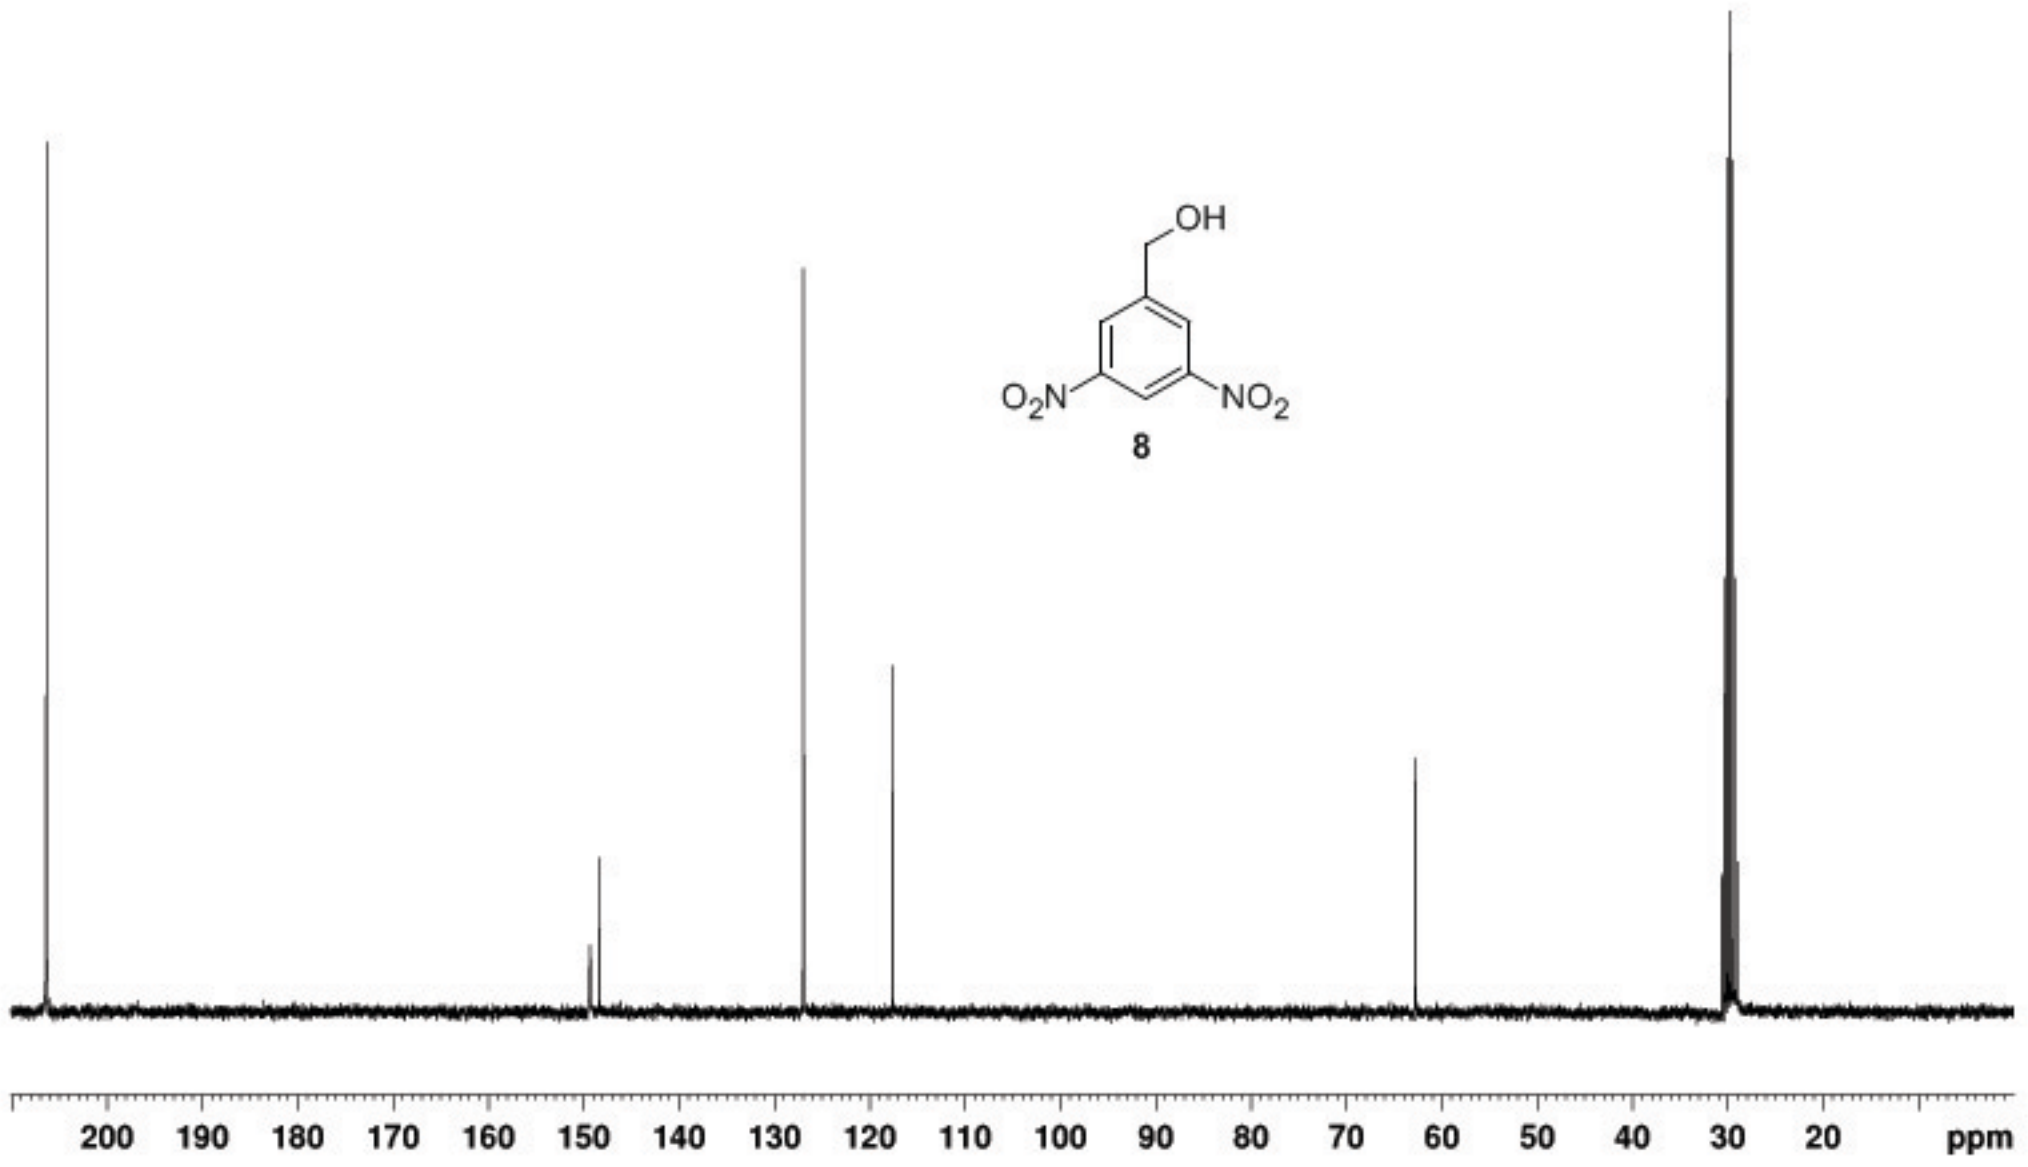

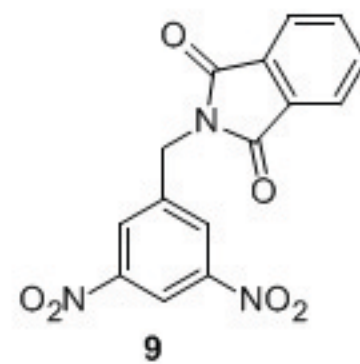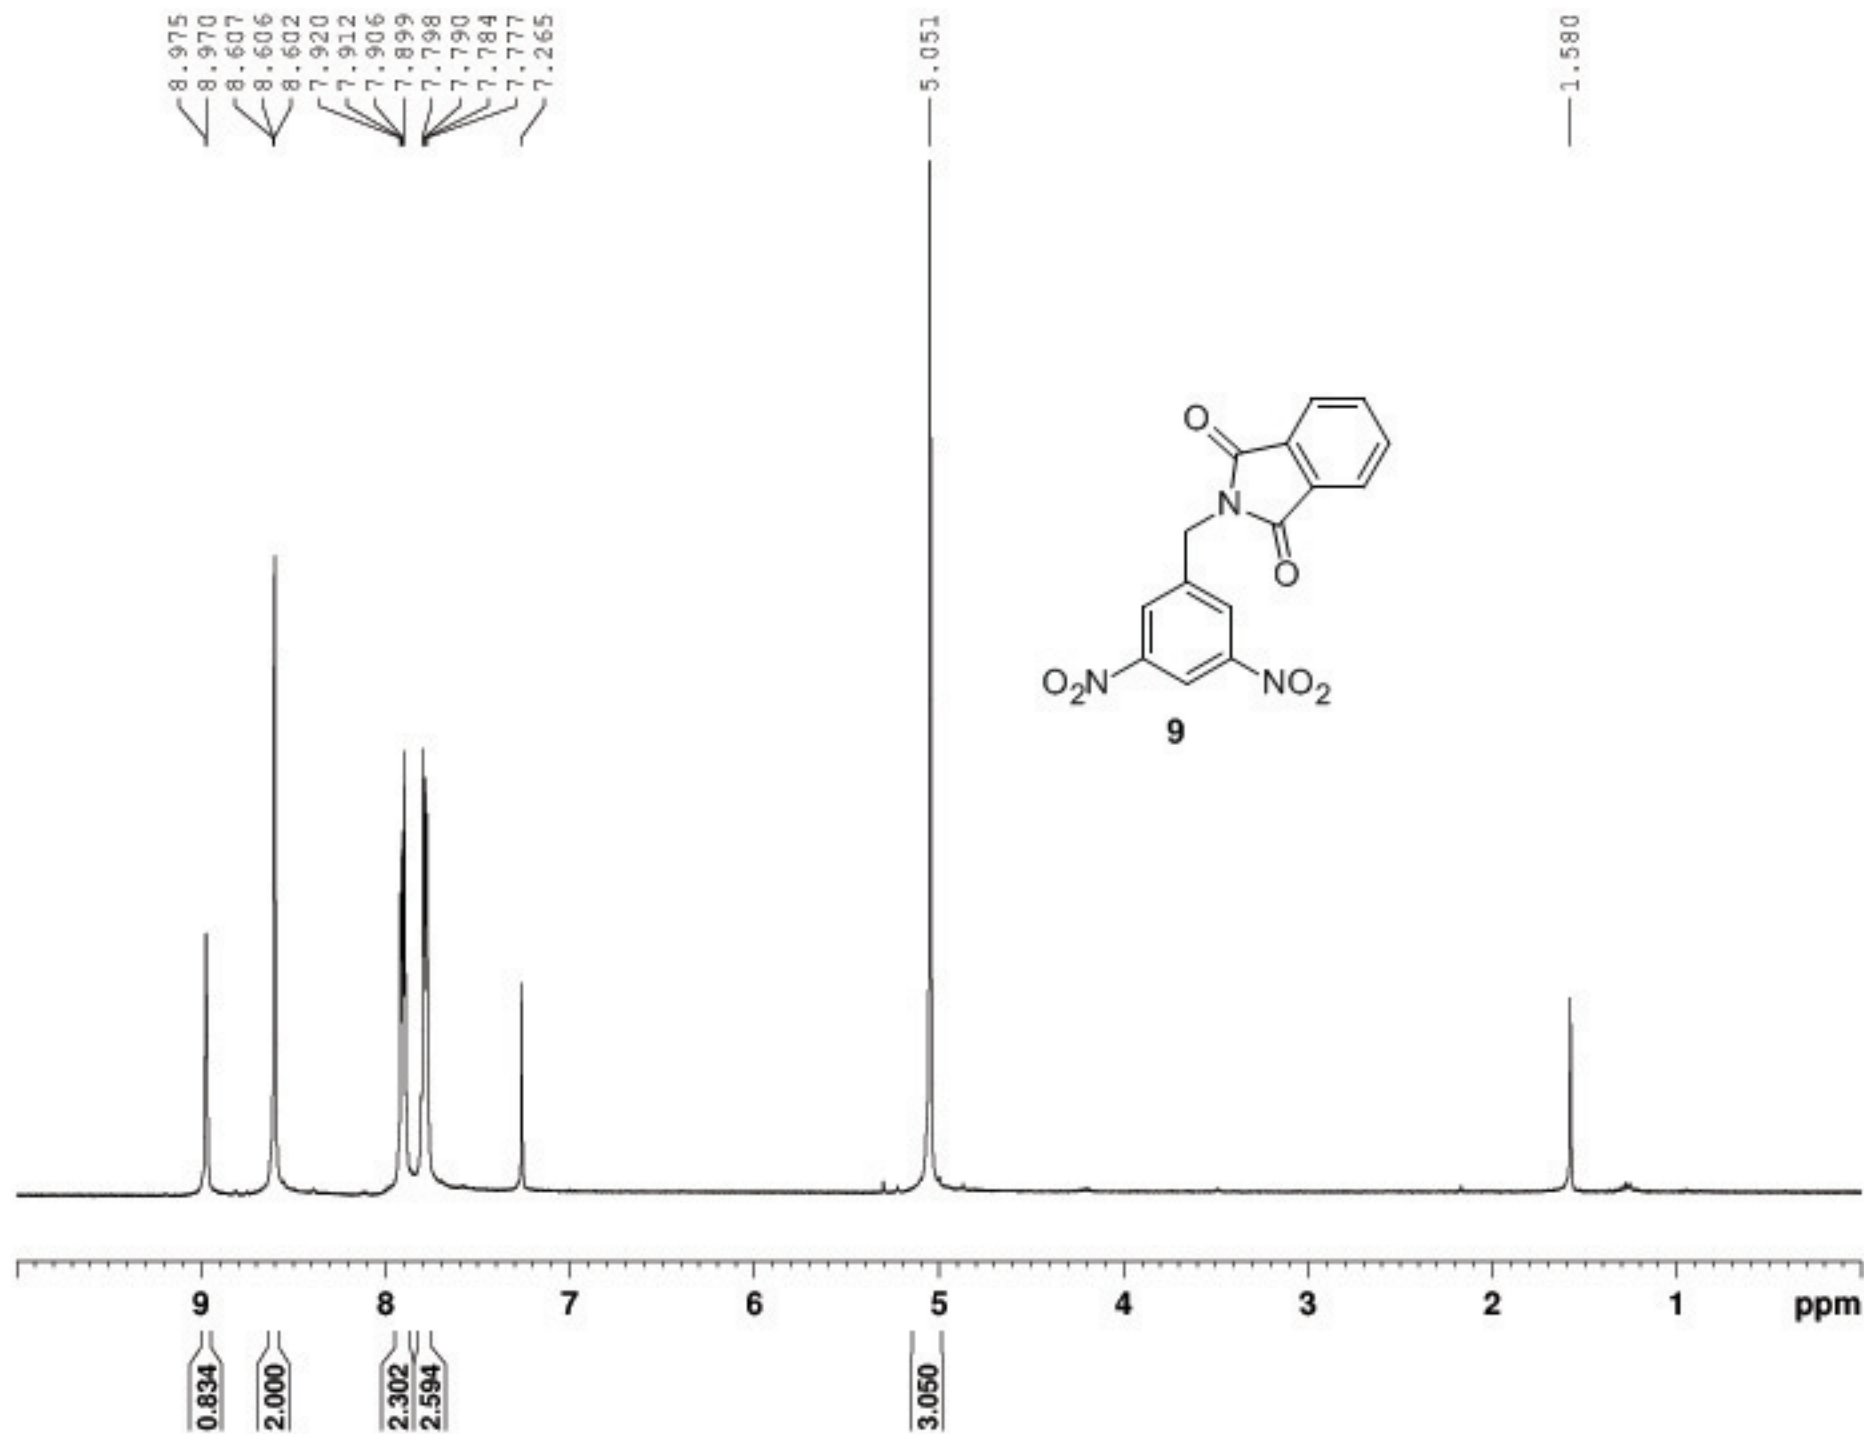

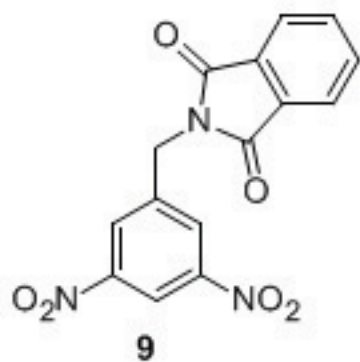

— 168.383

— 149.571

— 141.329

— 135.470

— 132.480

— 129.573

— 124.723

— 119.259

78.269  
77.846  
77.422

— 41.248

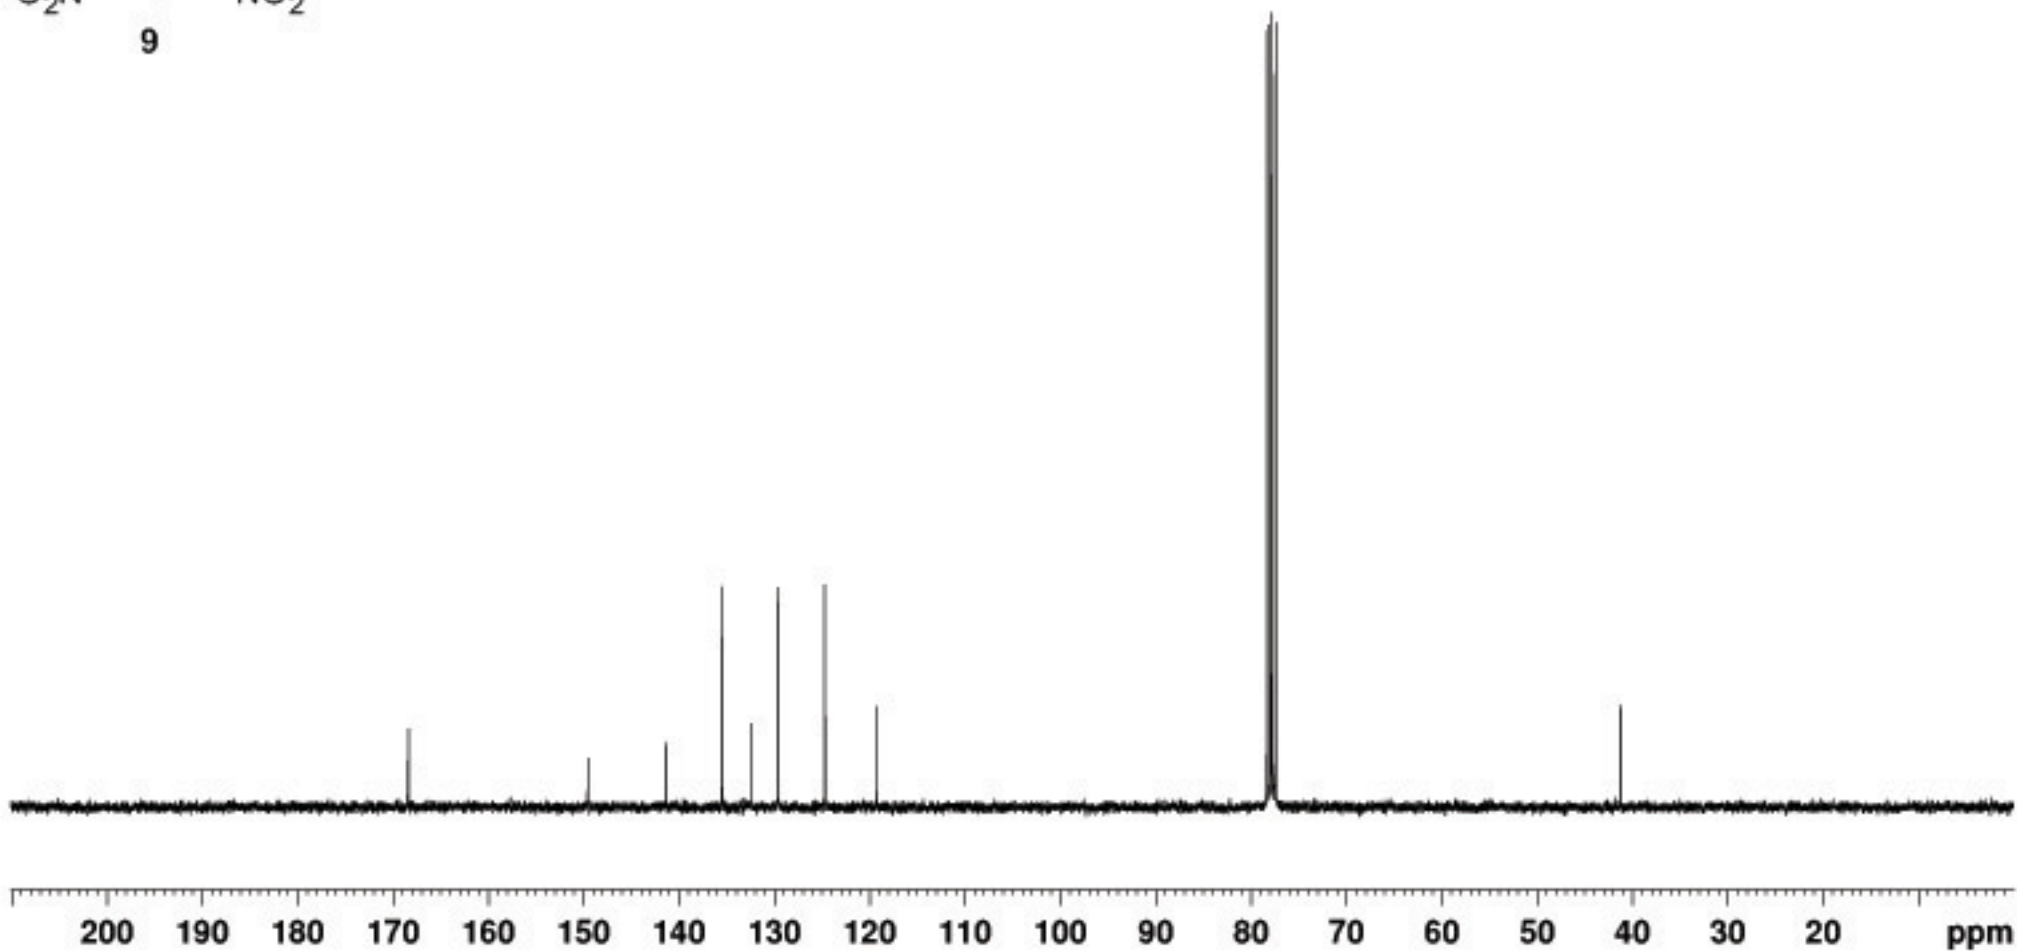

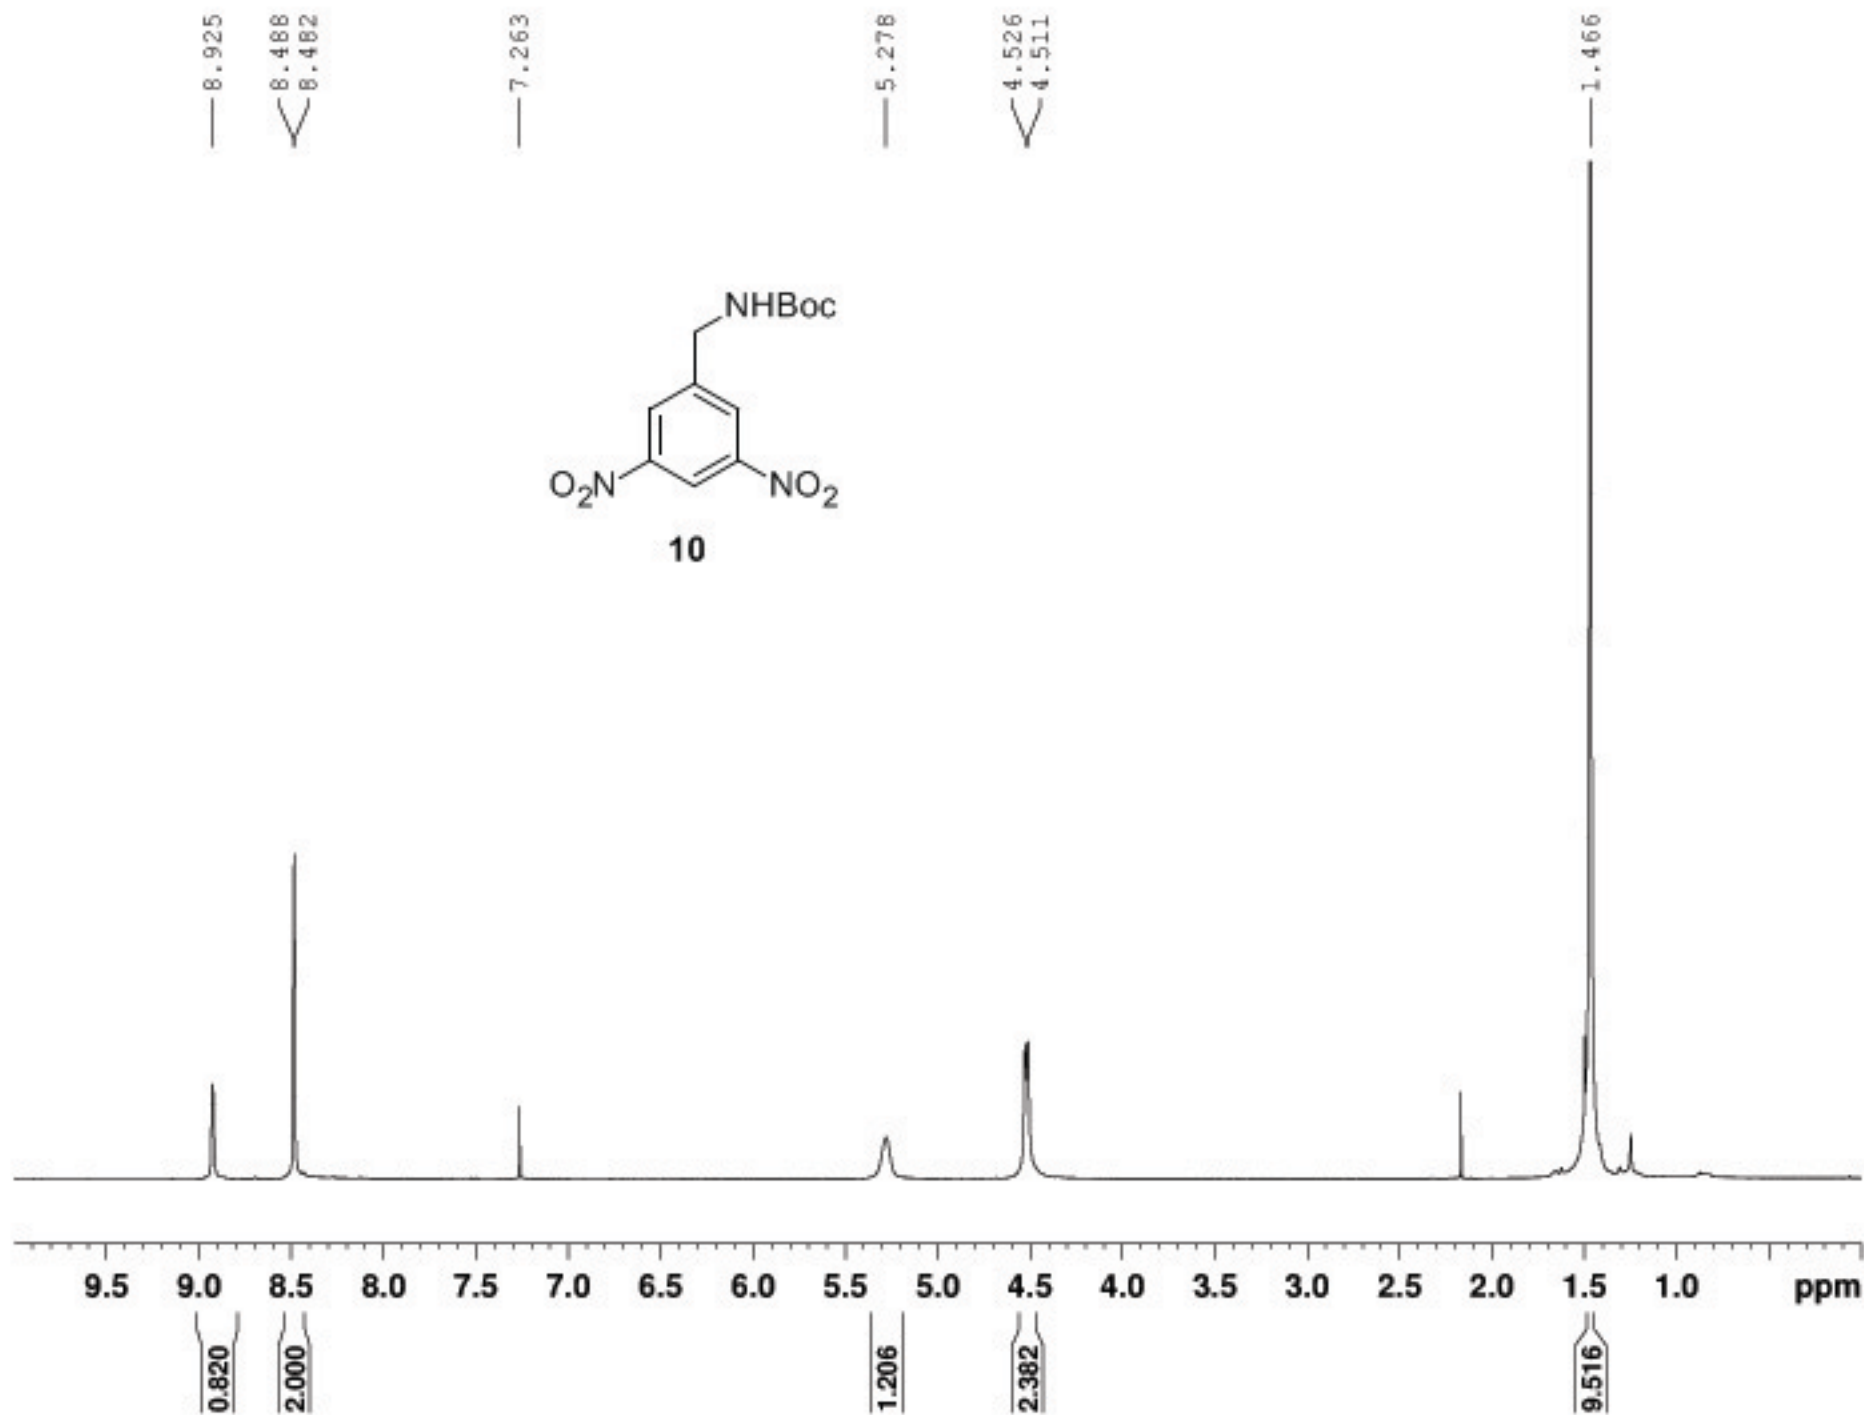

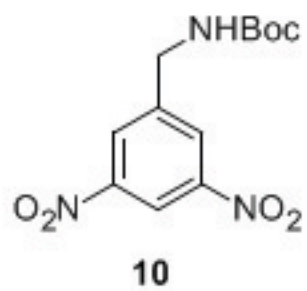

— 155.803  
— 148.438  
— 144.155  
  
— 127.085  
— 117.473  
  
— 80.580  
  
— 43.424  
— 28.117

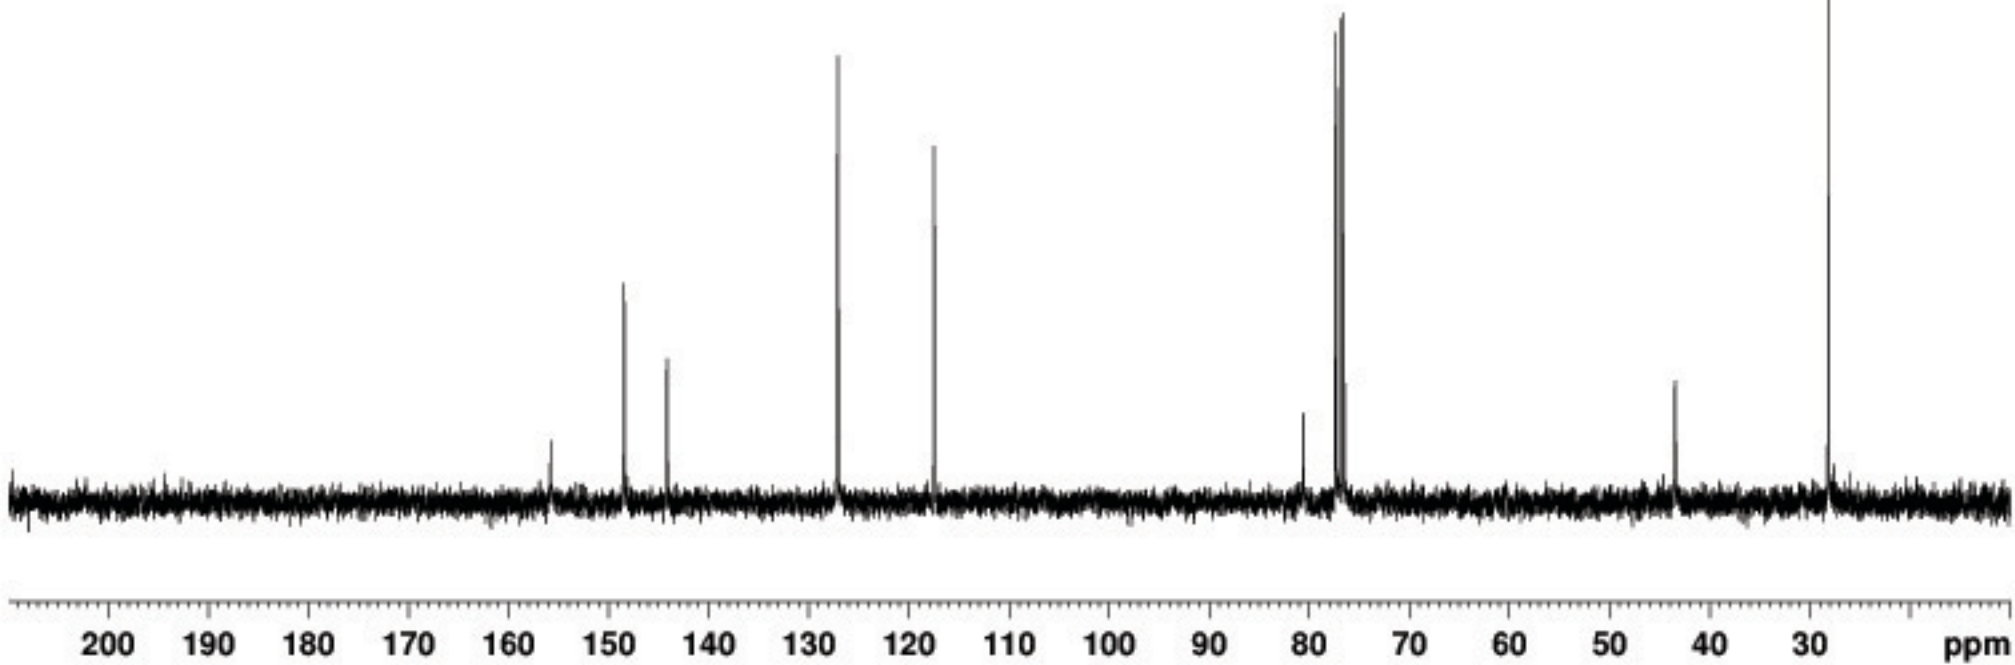

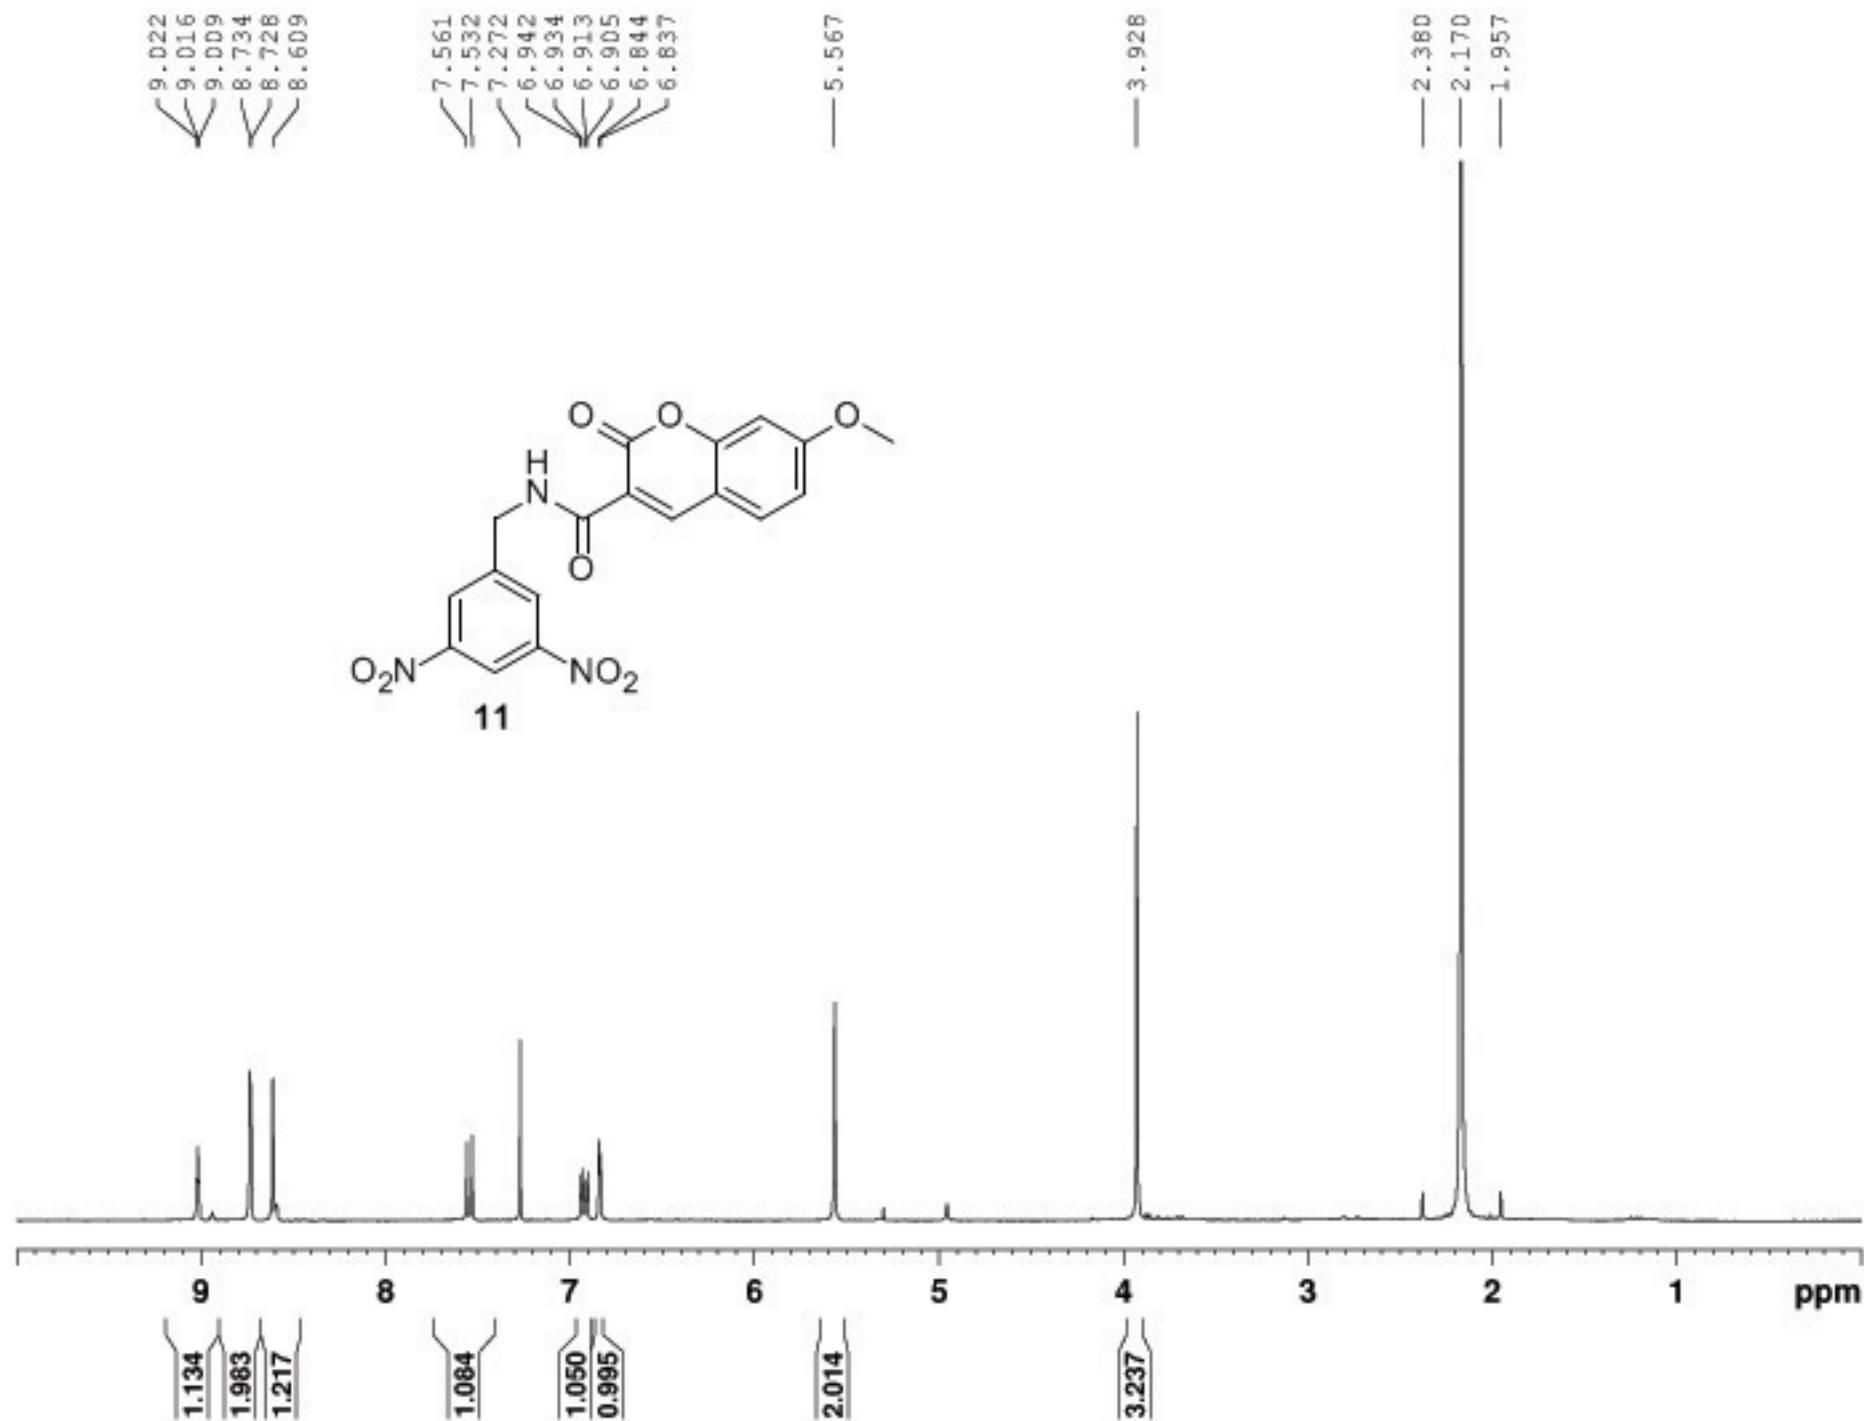

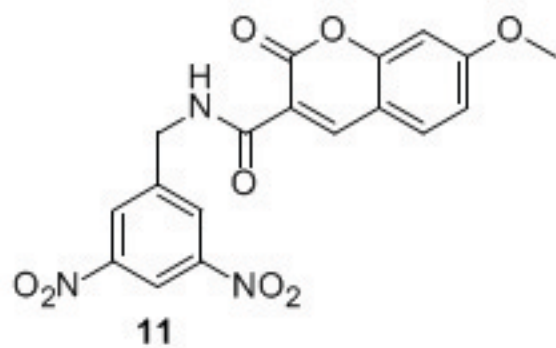

166.668  
164.111  
158.833  
151.332  
149.537  
141.132  
131.924  
128.660  
119.339  
114.916  
113.353  
112.331  
101.246

65.468  
56.959

31.761

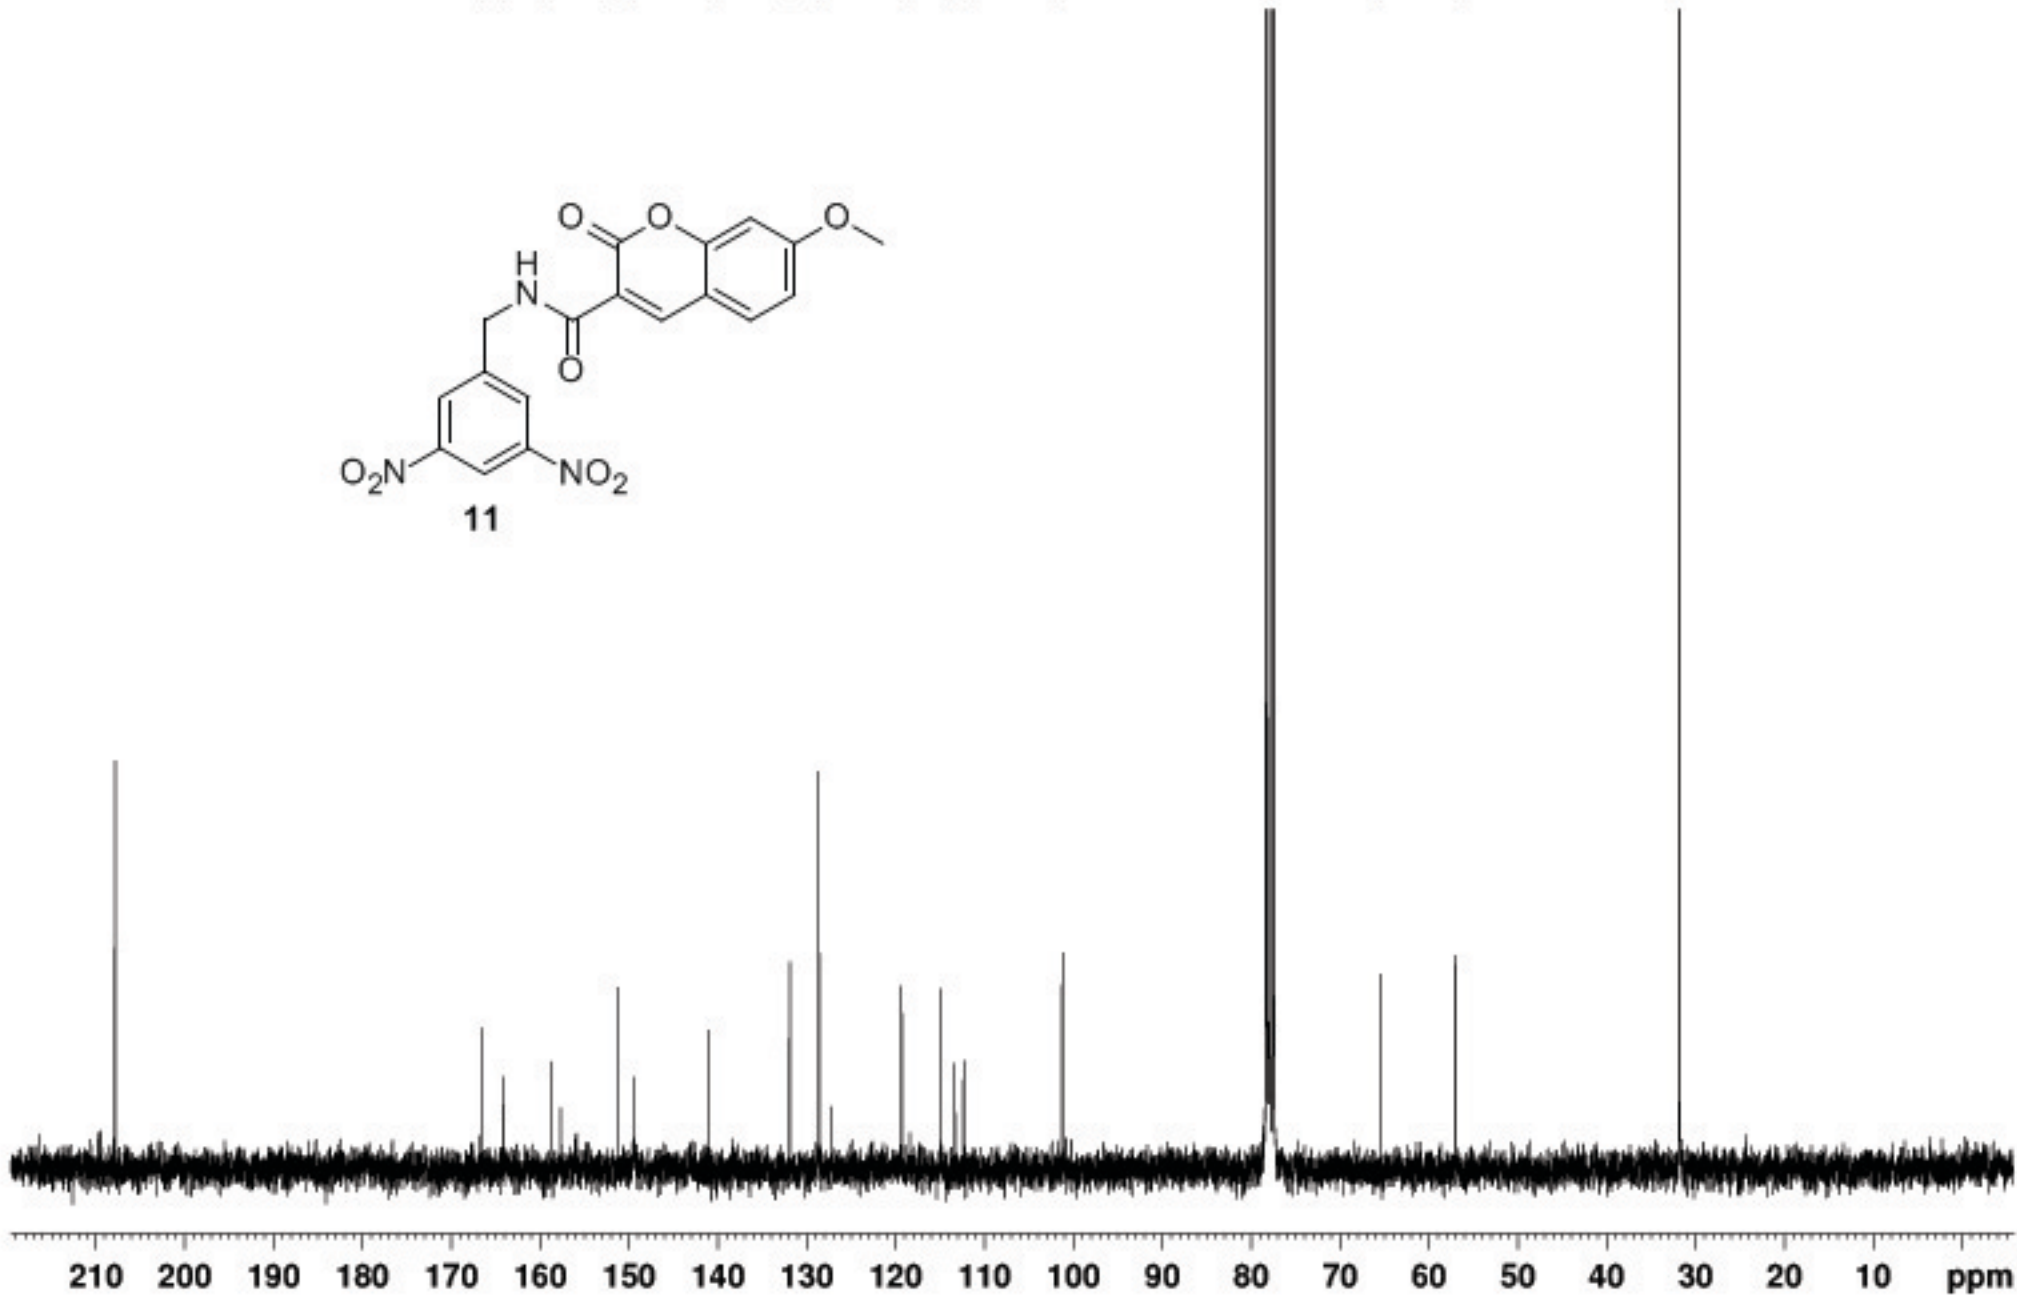

9.204  
8.860  
7.946  
7.929  
7.908  
7.345  
7.223  
7.128  
7.064  
7.044  
6.808  
4.622  
4.609  
3.905  
3.340  
2.897  
2.737  
2.505  
2.068  
1.246  
0.865

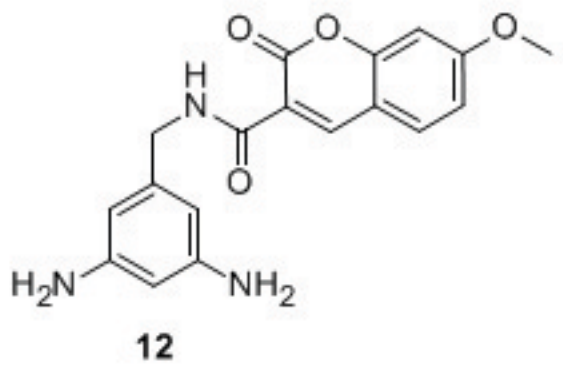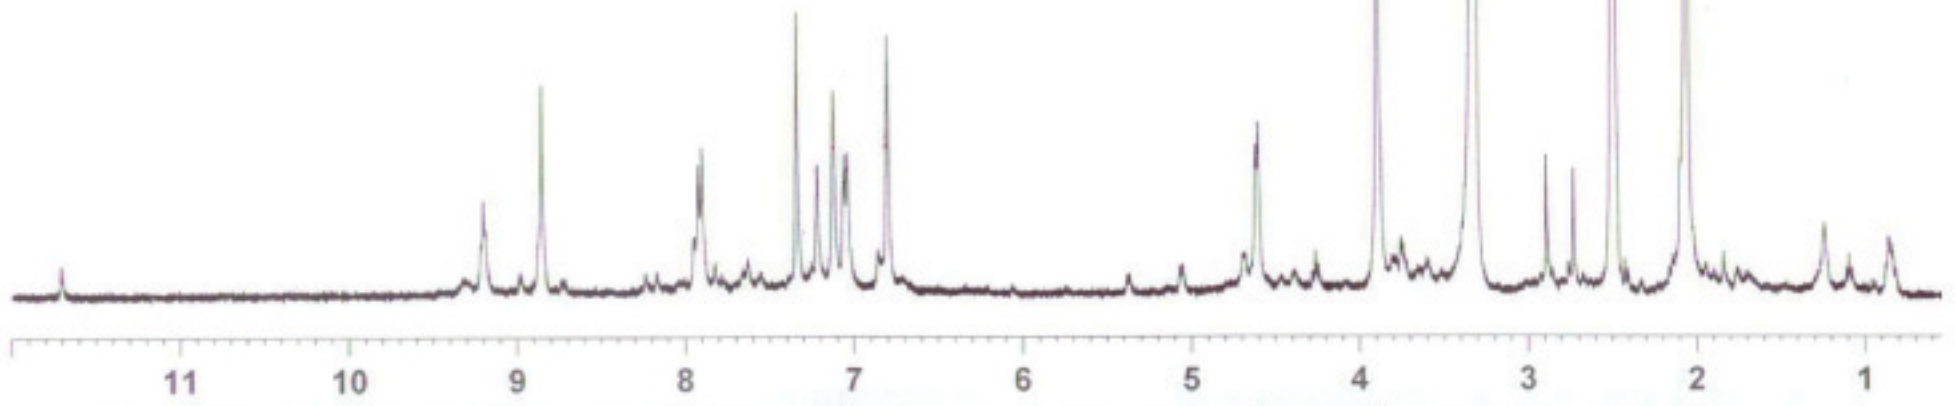

1.000  
1.413  
1.909  
1.640  
0.956  
1.619  
1.773  
2.090  
1.773  
4.663  
6.601



171.595  
 170.705  
 165.771  
 163.018  
 161.999  
 157.497  
 149.416  
 147.117  
 142.292  
 133.551  
 132.883  
 128.816  
 125.957  
 124.592  
 115.949  
 114.939  
 113.380  
 101.560

57.543  
 43.497  
 41.605  
 41.326  
 41.048  
 40.770  
 40.492  
 40.213  
 39.935  
 12.120

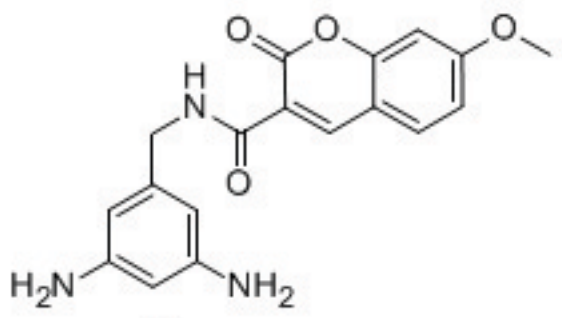

12

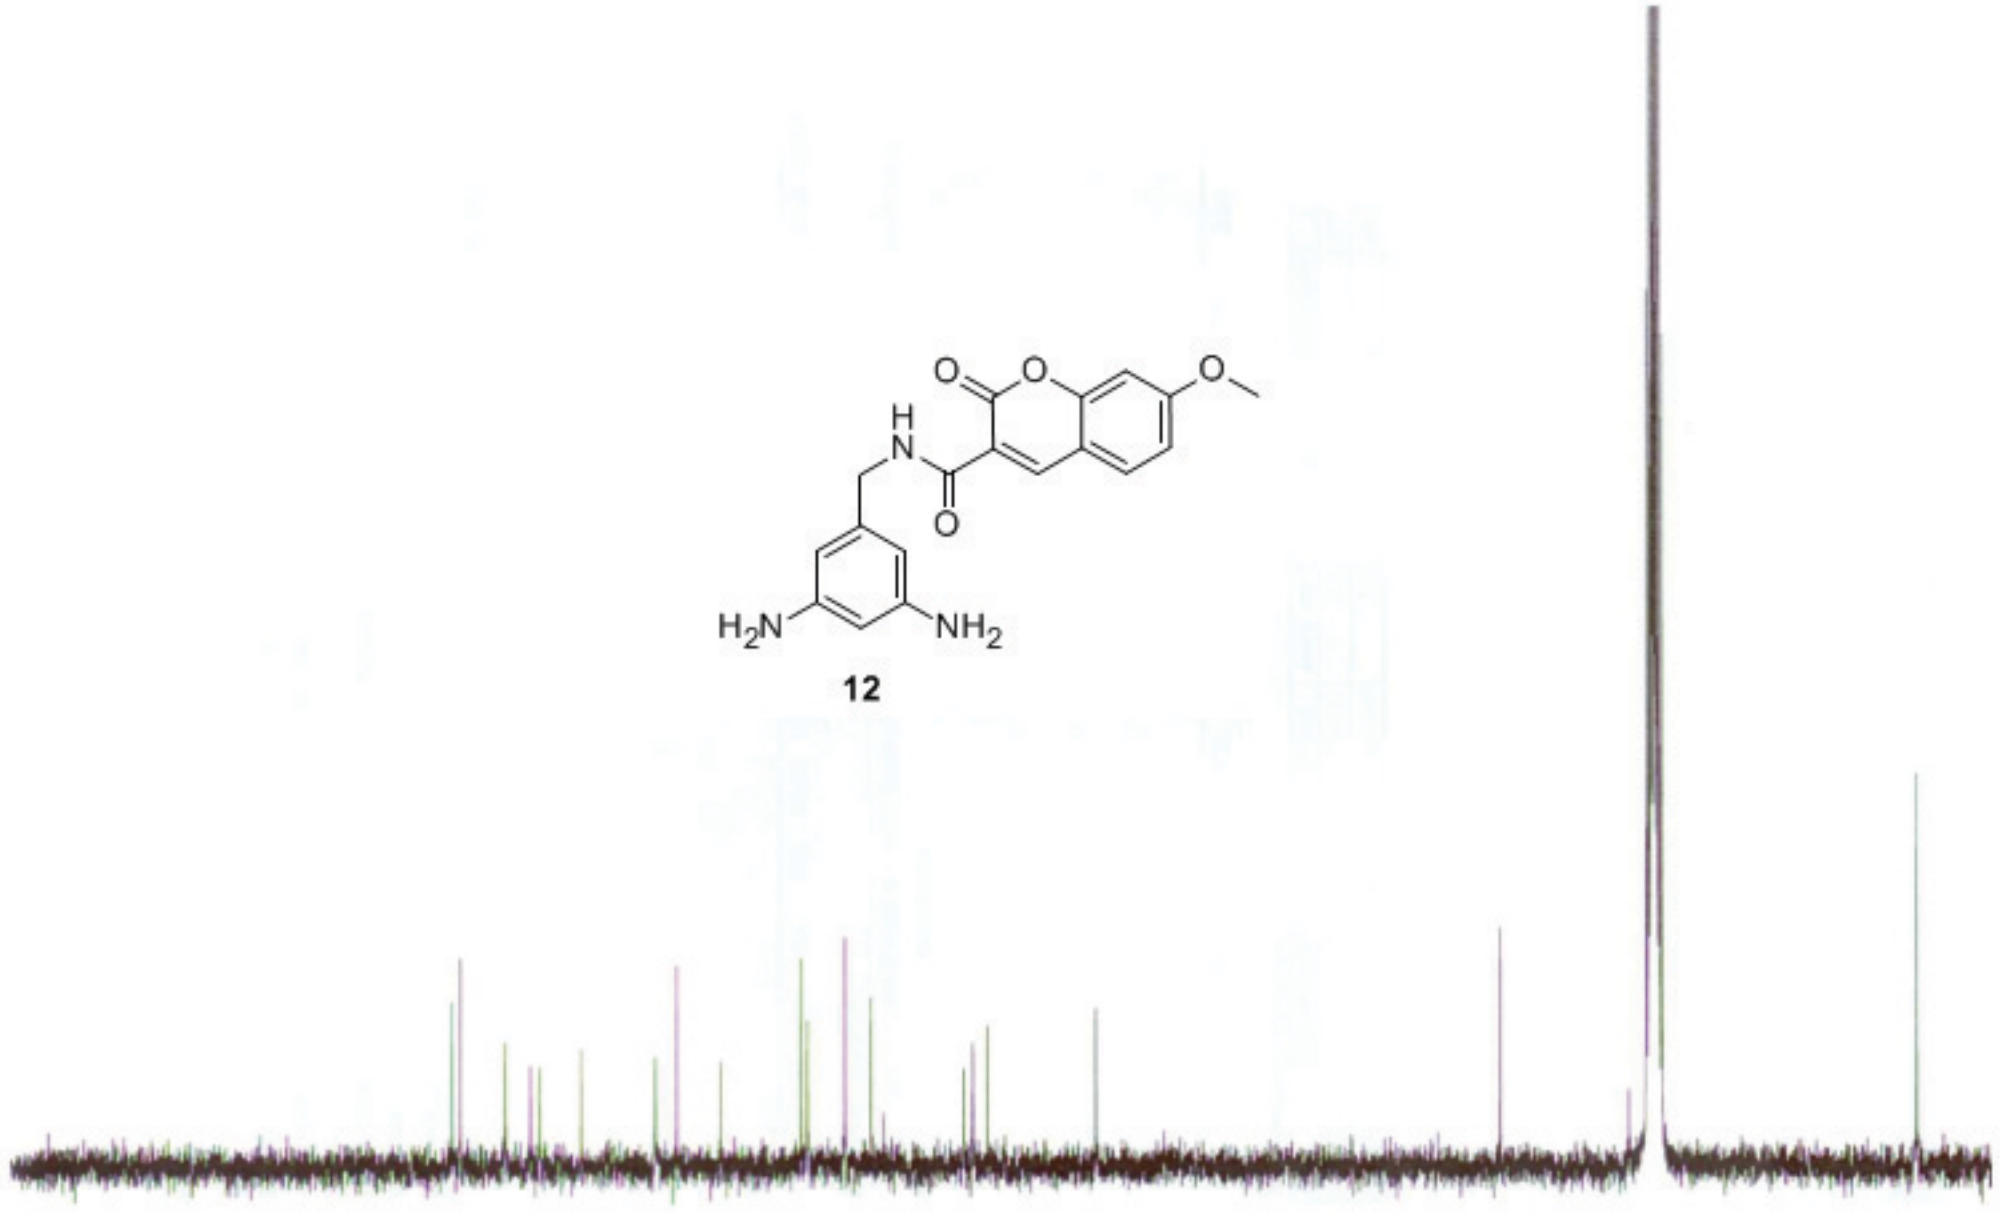

210 200 190 180 170 160 150 140 130 120 110 100 90 80 70 60 50 40 30 20 ppm

8.143  
8.136  
8.130  
7.646  
7.640  
7.237

3.634

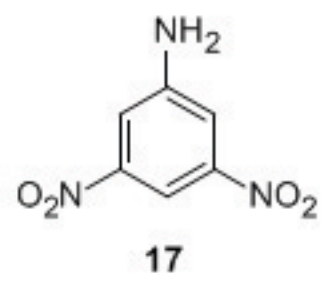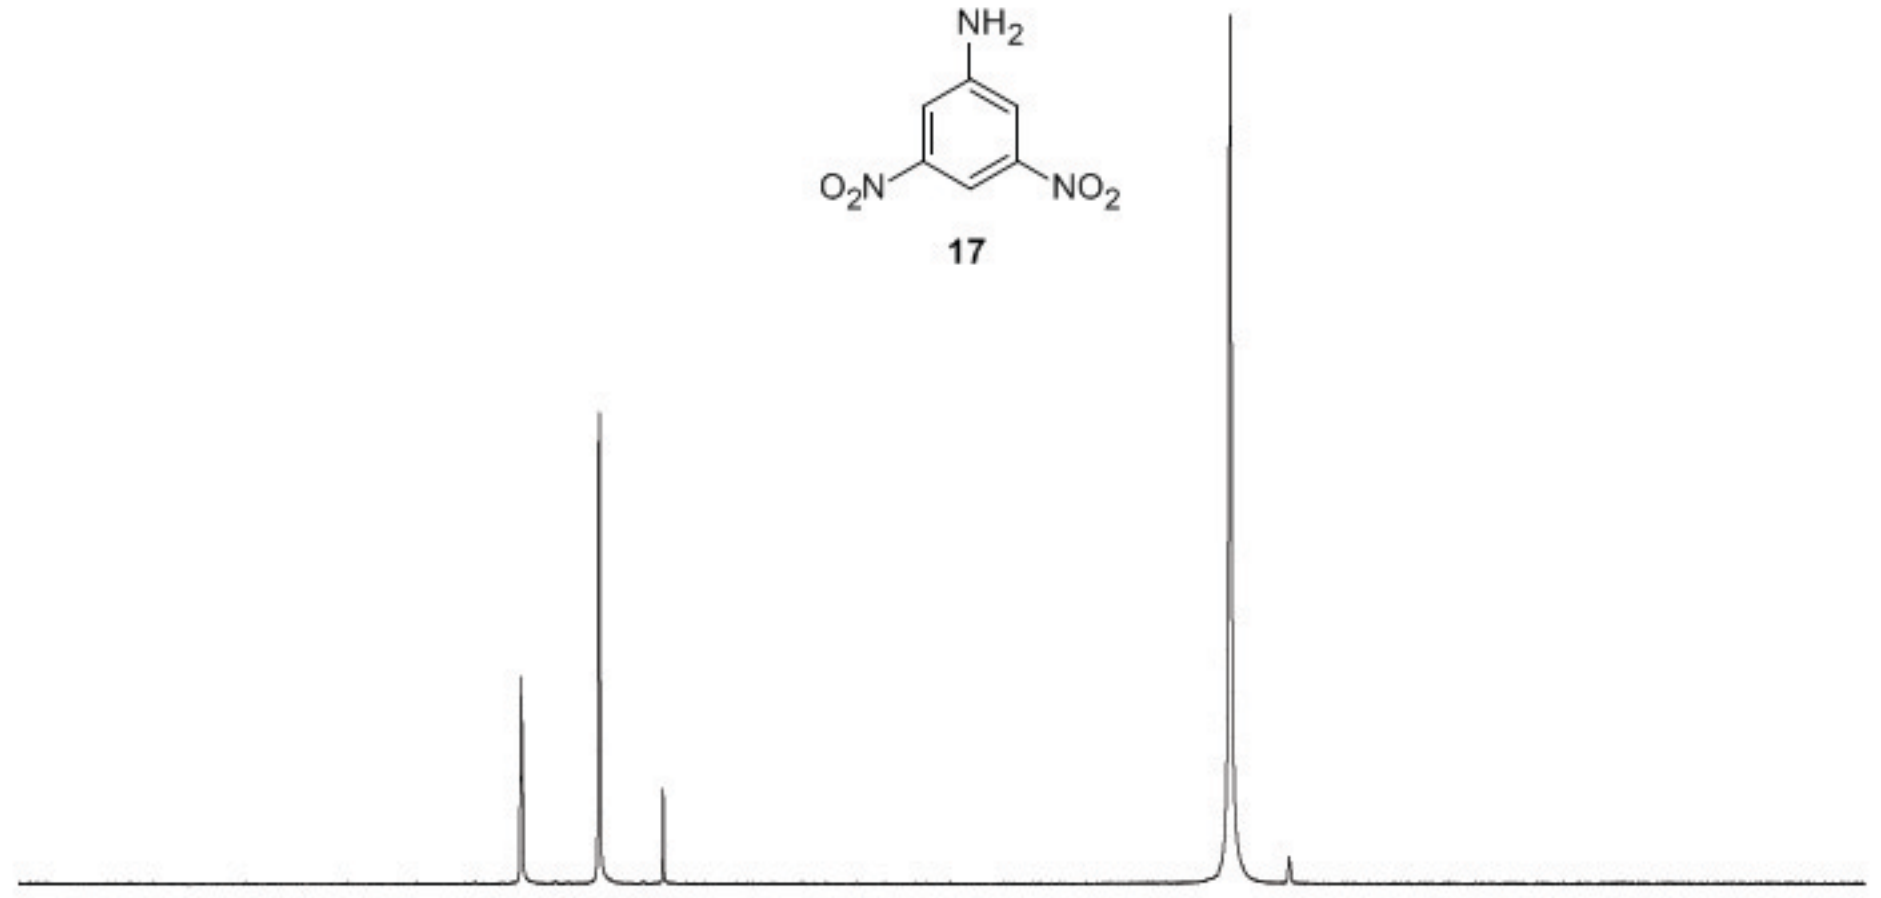

11 10 9 8 7 6 5 4 3 2 1 ppm

1.000

2.204

7.792

151.869  
150.135

113.114

105.202

48.719  
48.435  
48.151

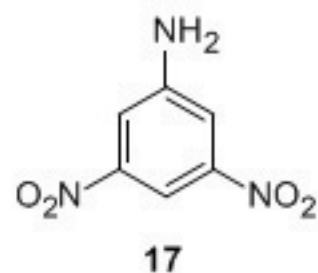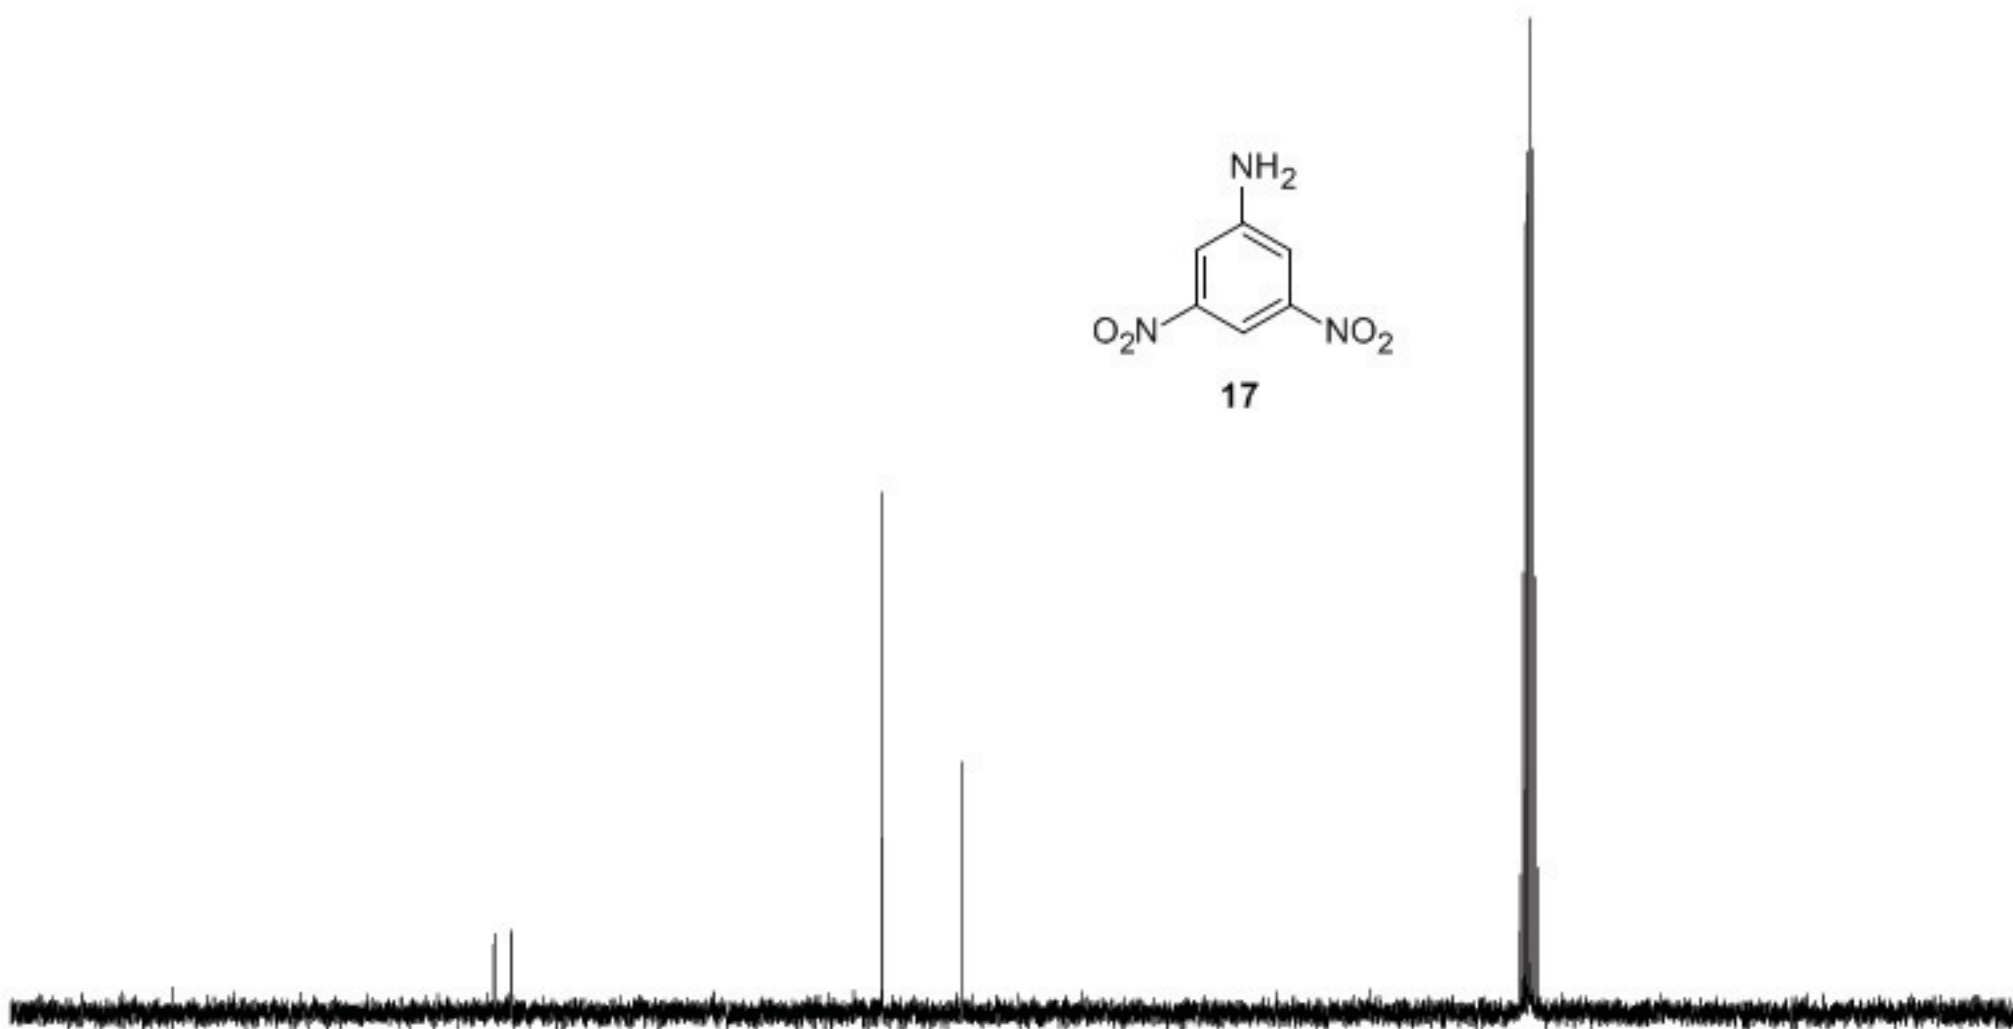

190 180 170 160 150 140 130 120 110 100 90 80 70 60 50 40 30 20 ppm

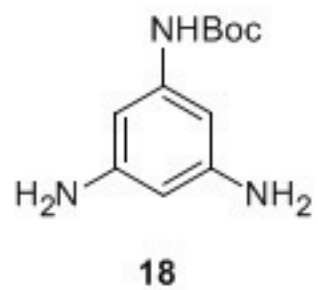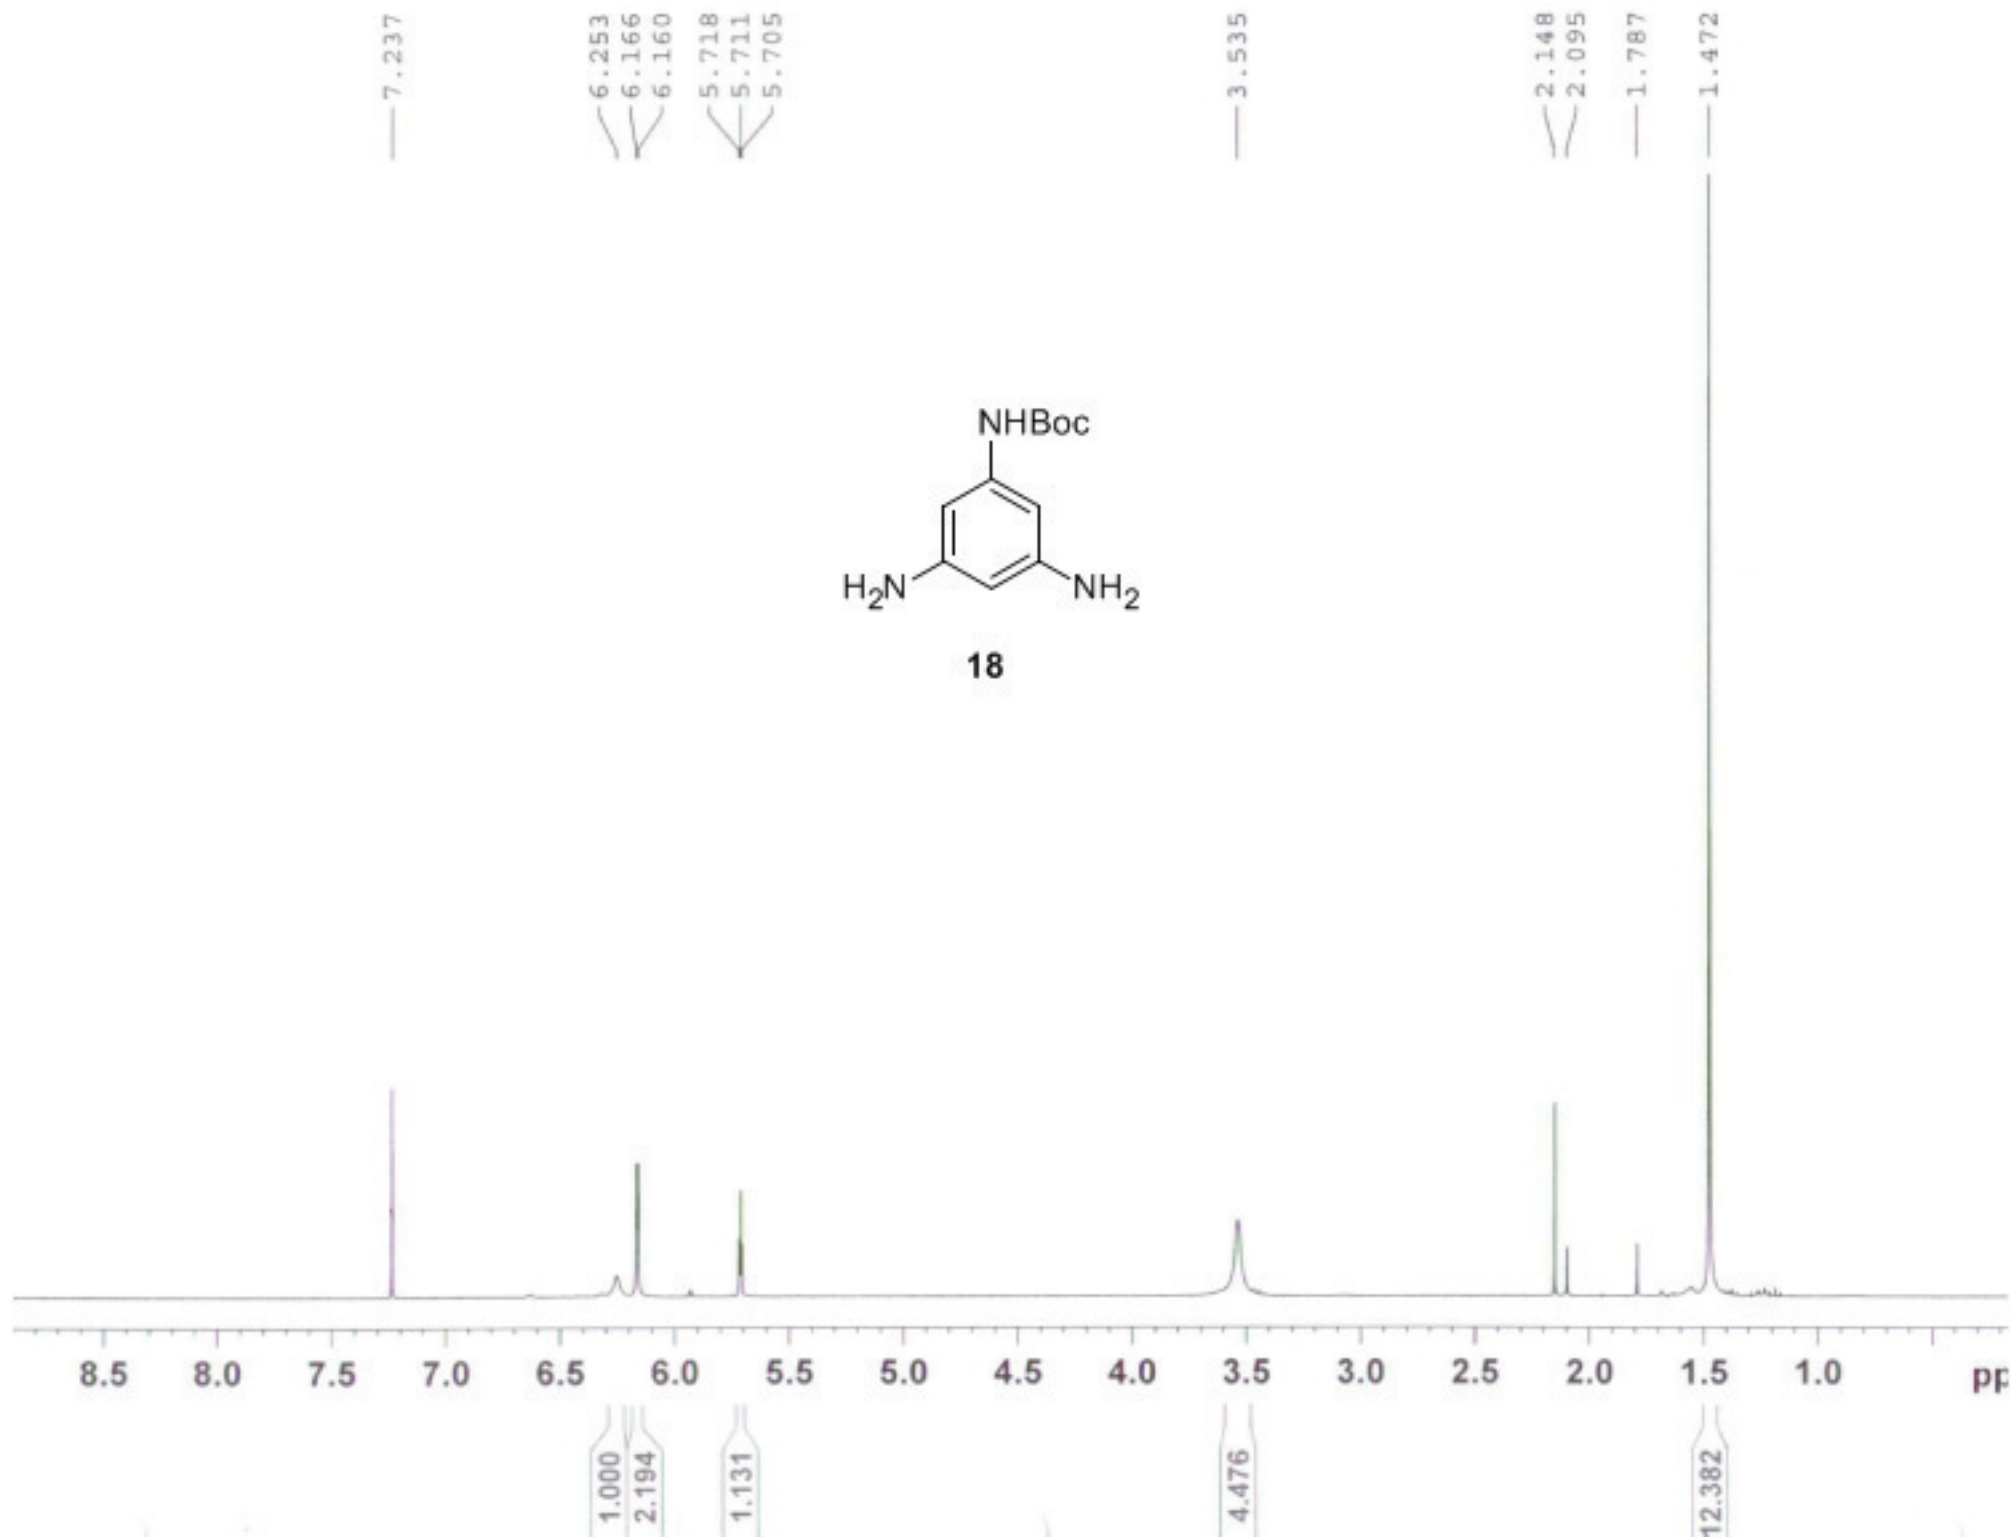

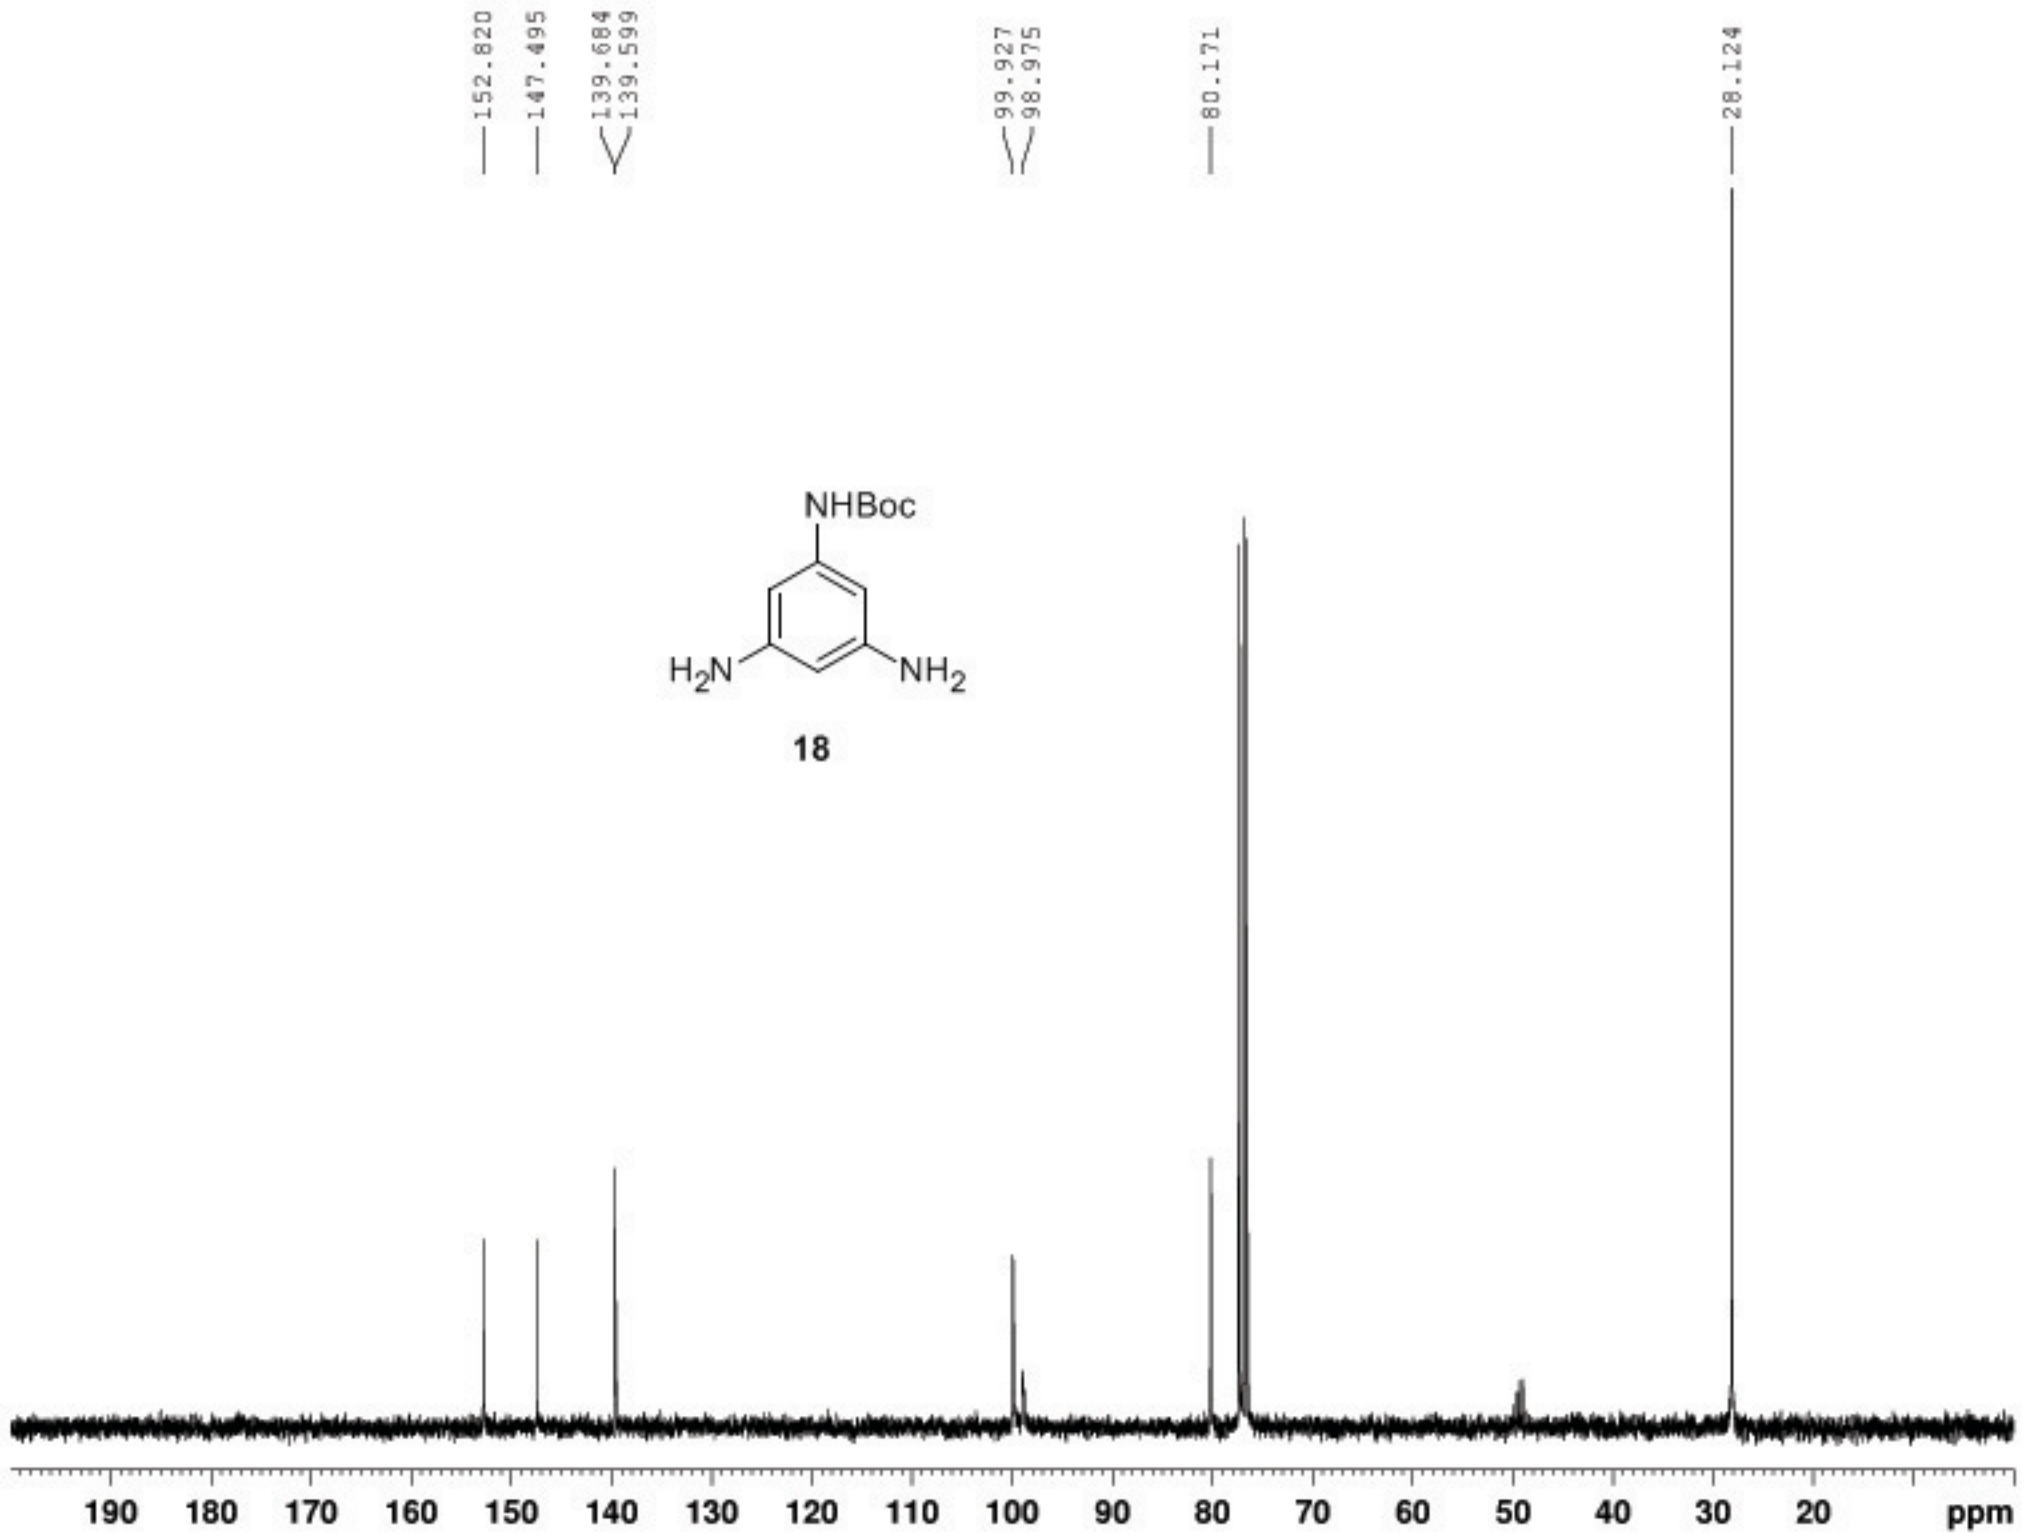

7.424  
7.418  
7.105  
7.099  
7.093  
6.427  
6.423  
6.421  
6.417  
6.415  
6.409

2.126  
2.123  
2.123  
2.098  
2.093  
1.450  
0.835

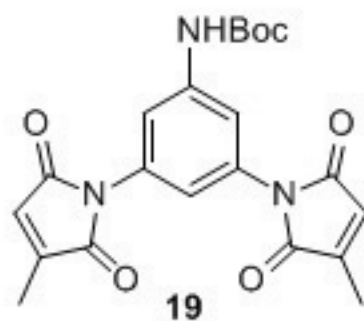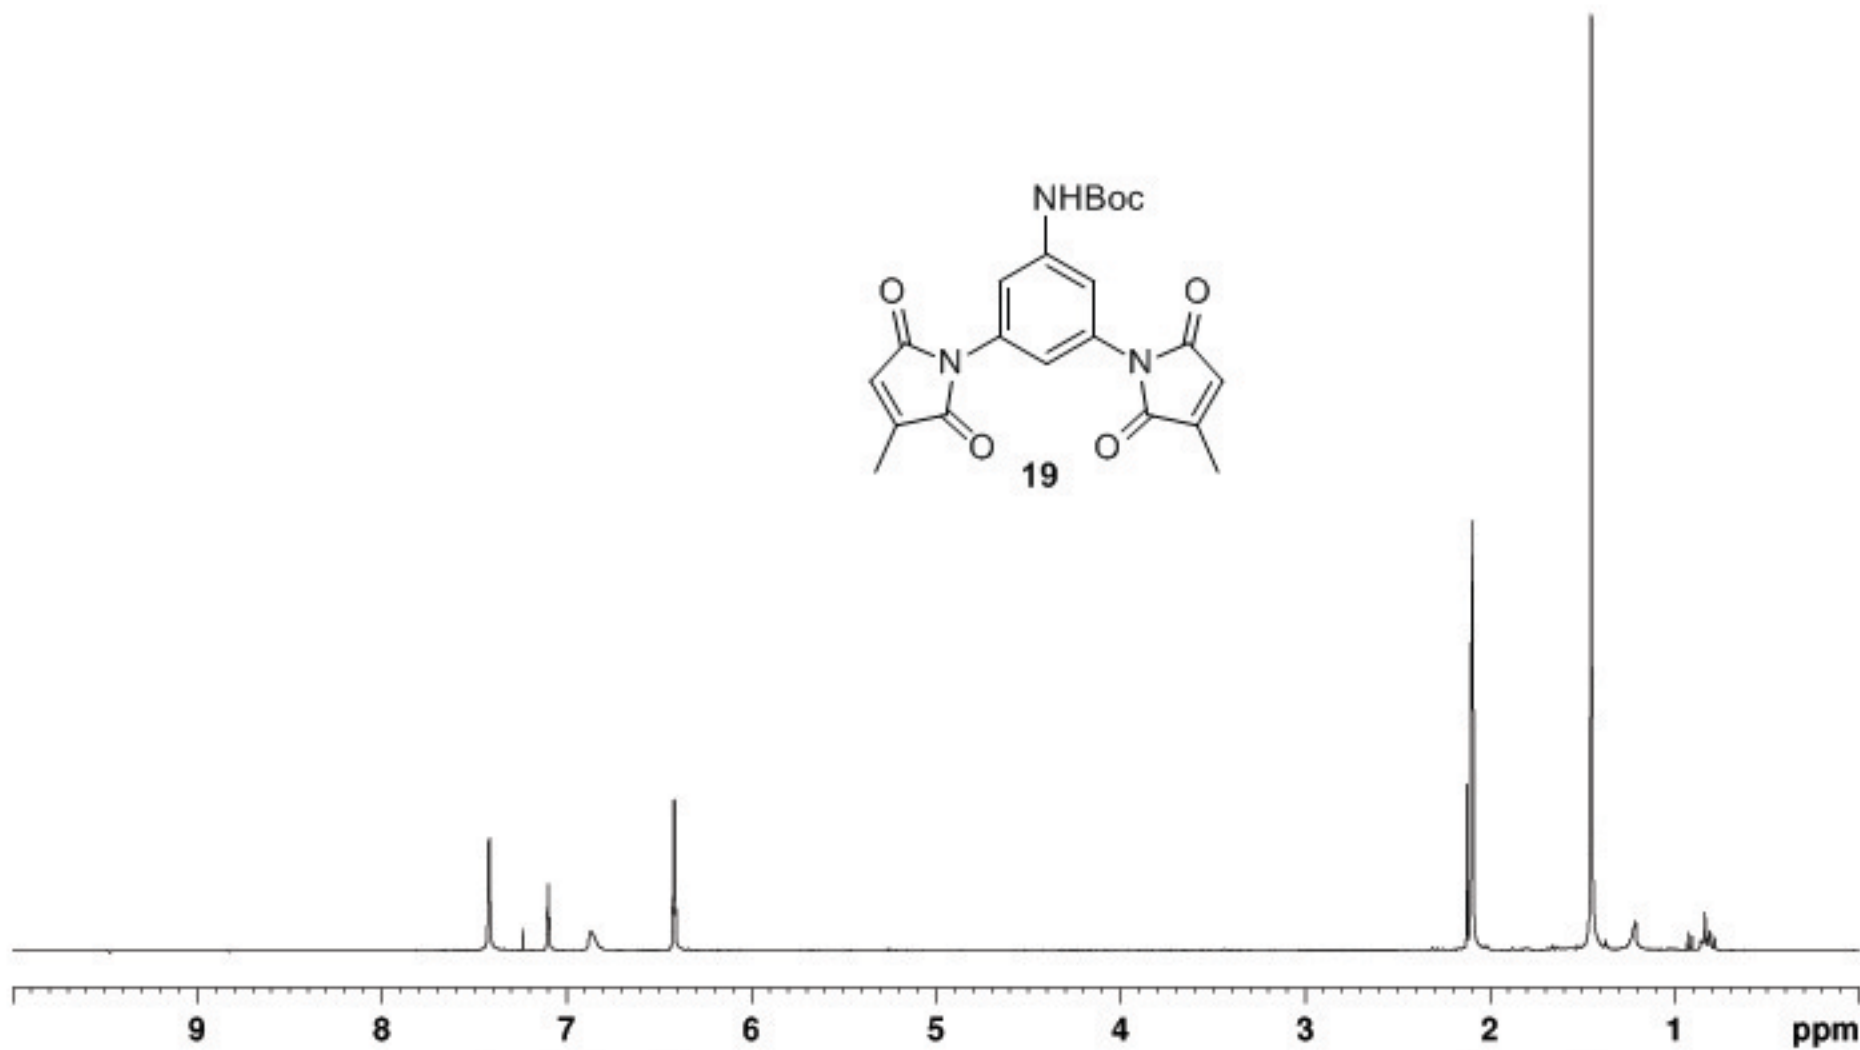

2.044  
0.890  
1.013  
2.000

6.665  
10.338

169.972  
168.896

152.173

145.724

139.466

132.486

127.353

116.516

114.062

80.864

77.364

76.940

76.516

28.118

10.996

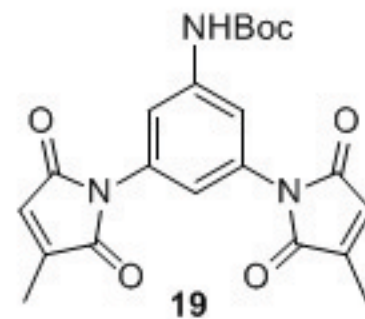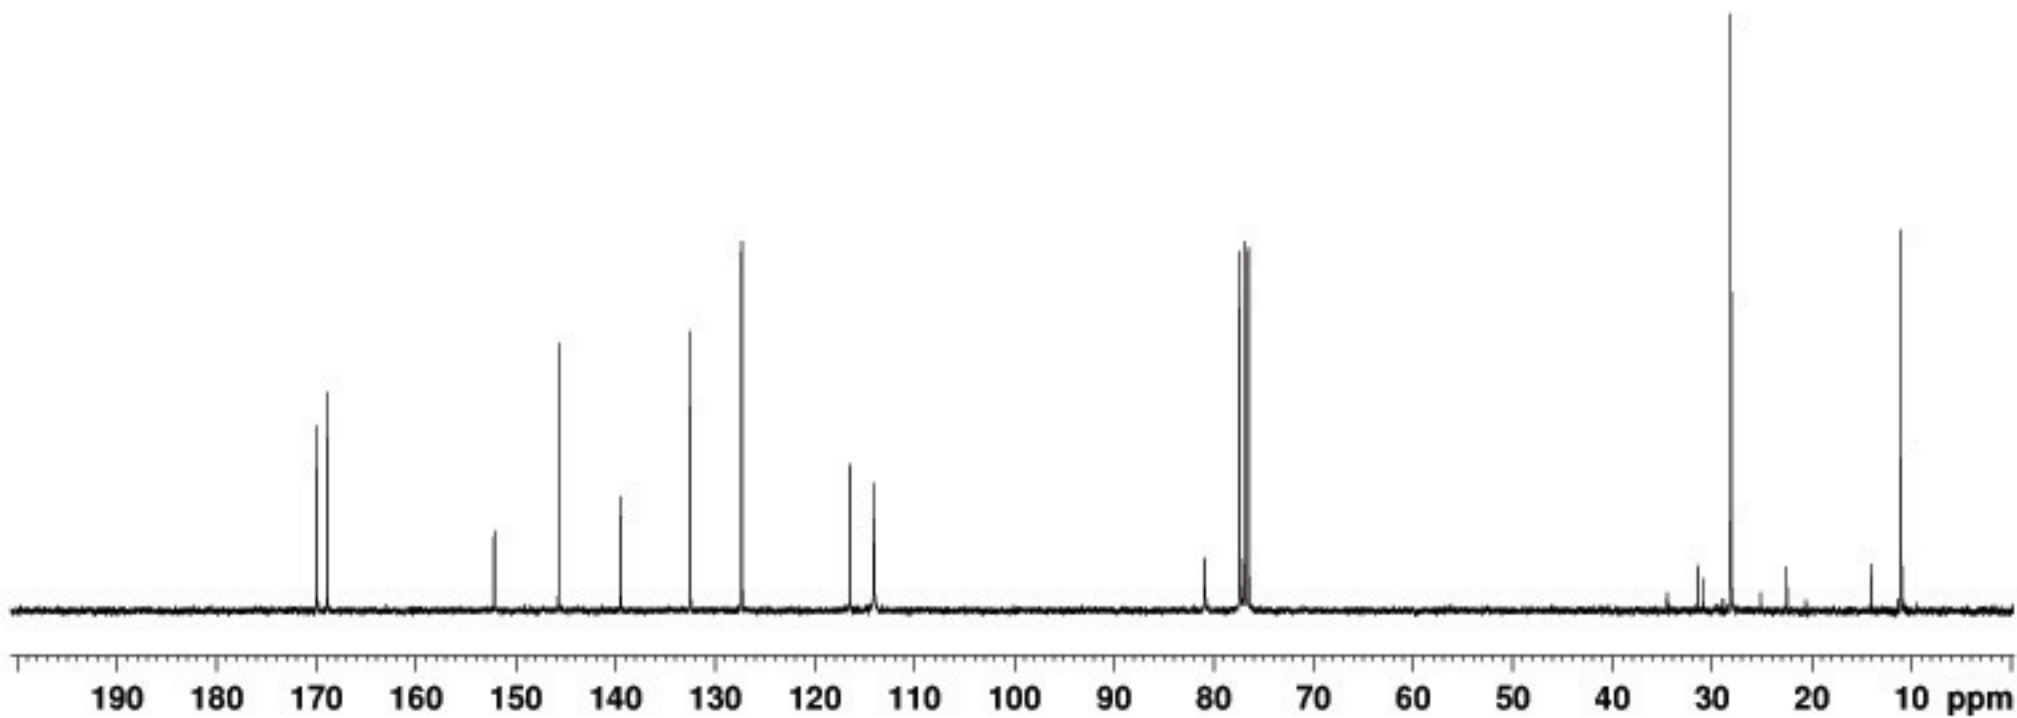



— 11.083

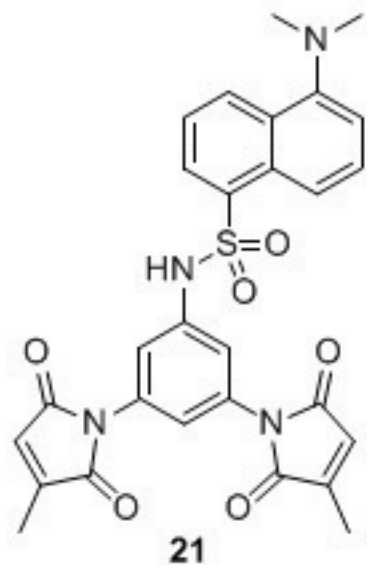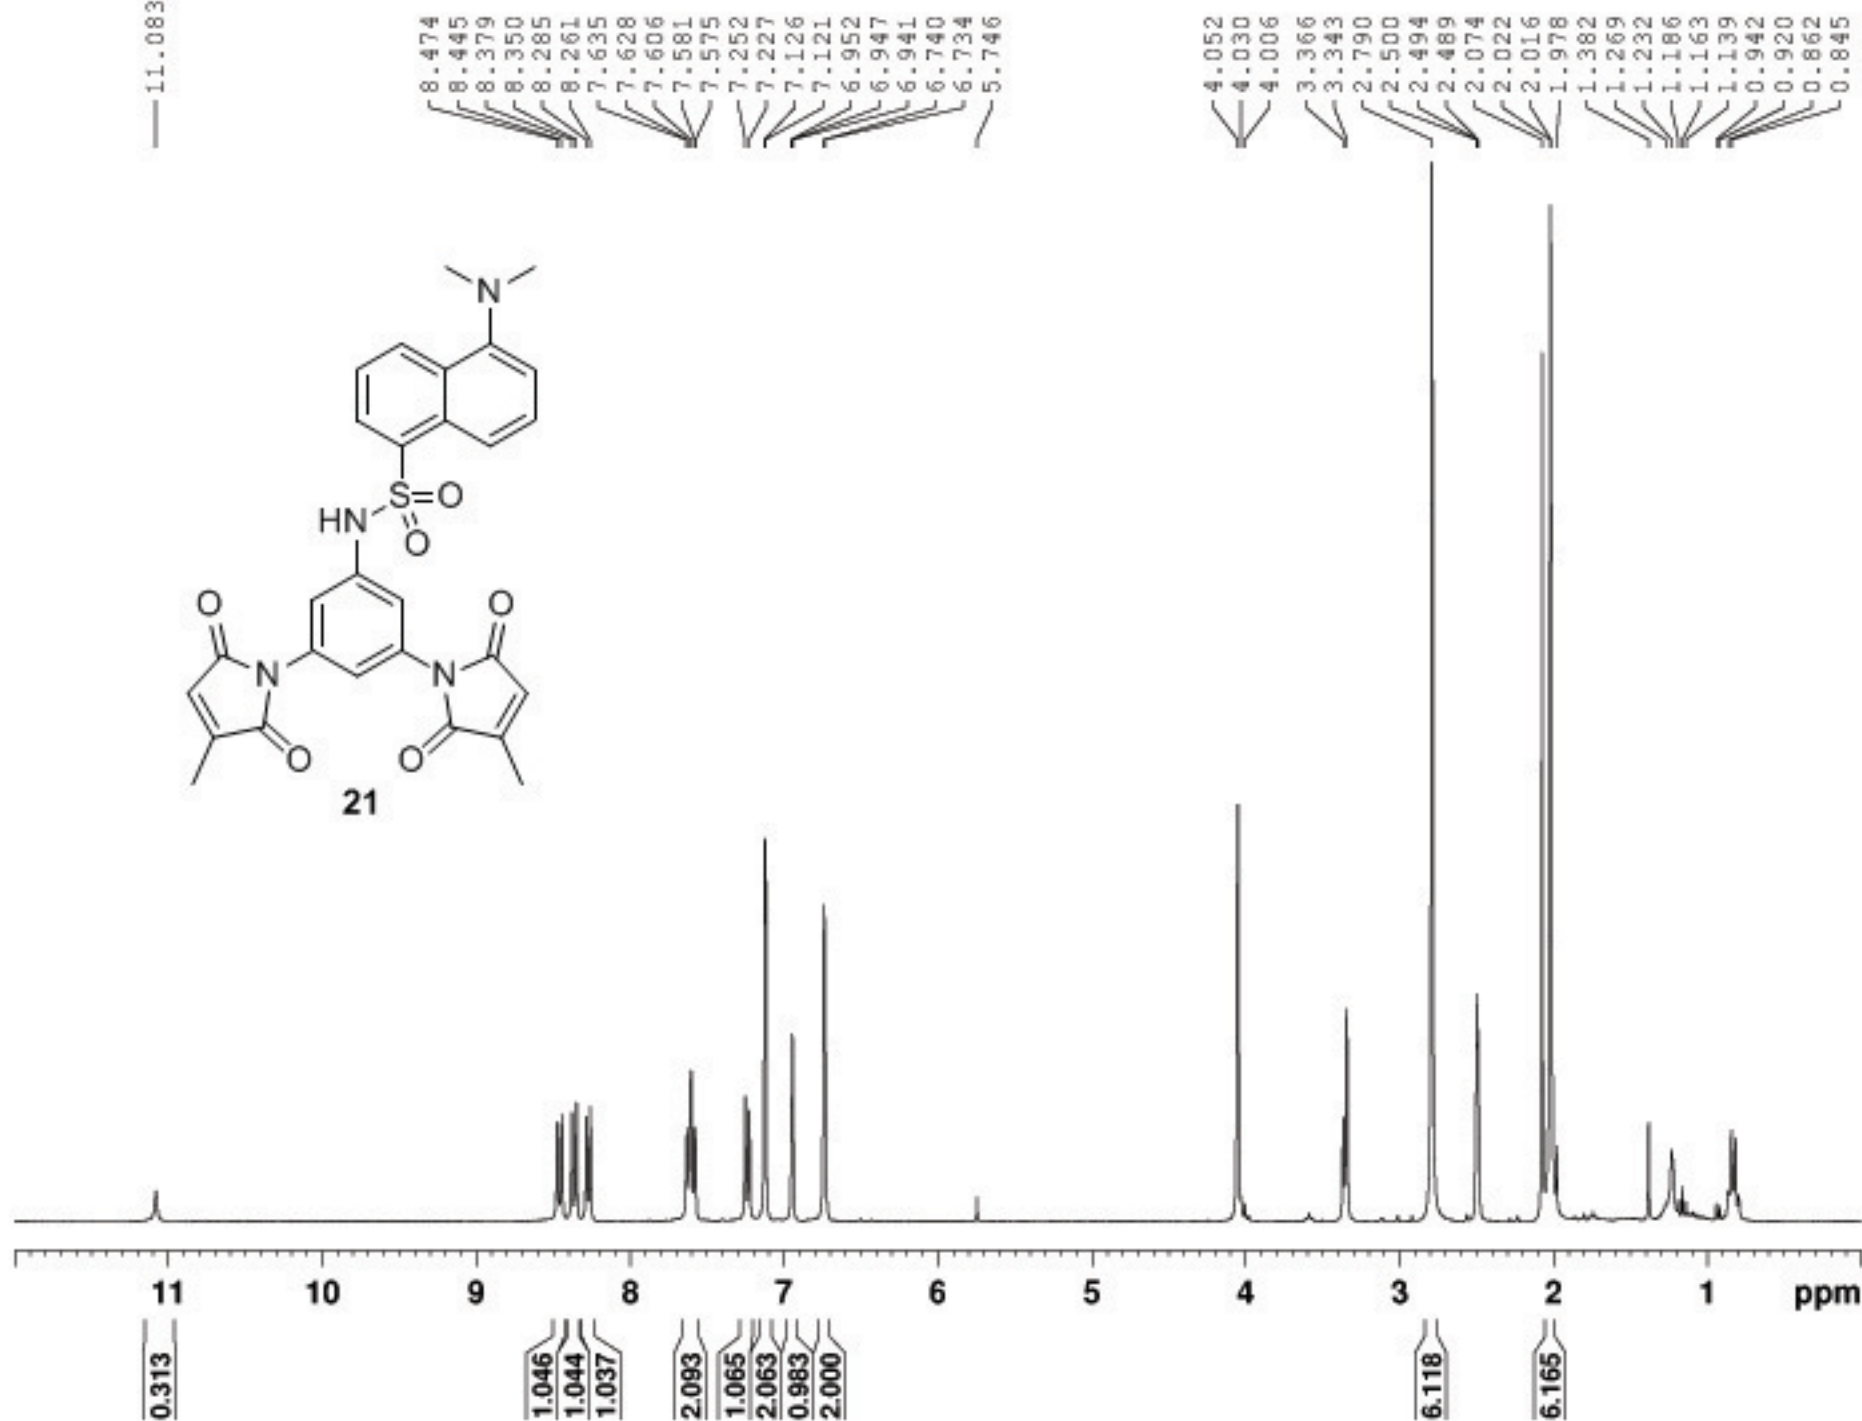

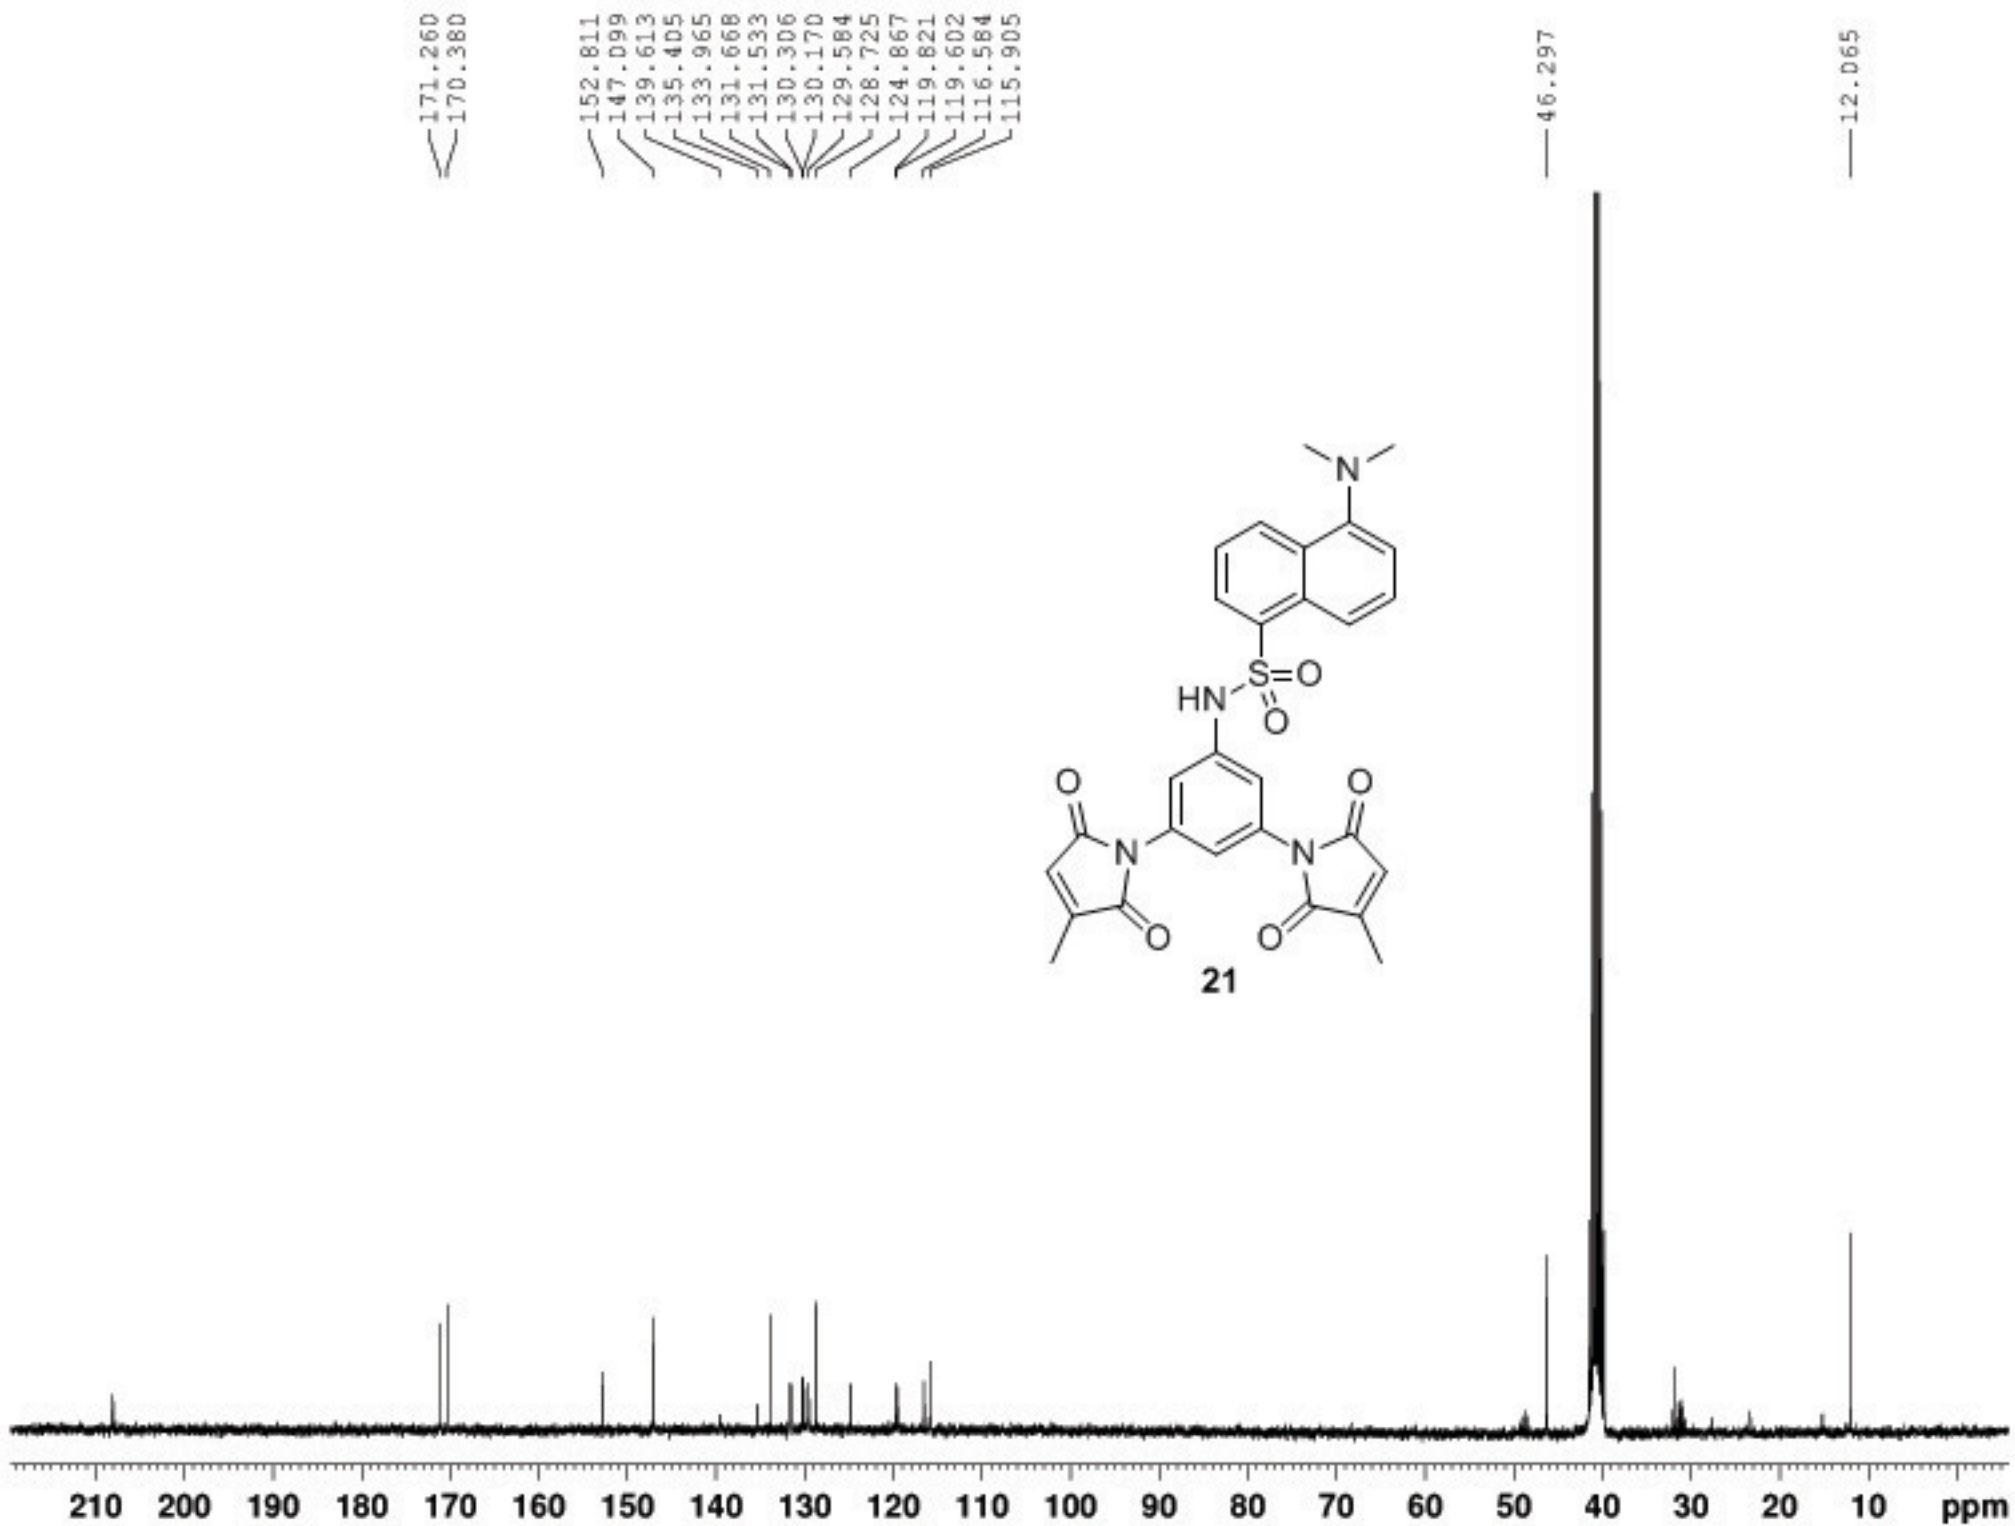

Supplement: c0ob00455c_1.pdf [file c0ob00455c_1.pdf]
